# Supplementary material for: School-based interventions for preventing substance use in indigenous children ages 7–13: a scoping review protocol
Source: PubMed Central journal article supplement — BMJ Open. 2020 Feb 12;10(2):e034032. doi: 10.1136/bmjopen-2019-034032 (PMC7045254; doi:10.1136/bmjopen-2019-034032), 2020-02-12
Supplement: bmjopen-2019-034032.draft_revisions.pdf [file bmjopen-2019-034032.draft_revisions.pdf]

# BMJ Open

BMJ Open is committed to open peer review. As part of this commitment we make the peer review history of every article we publish publicly available.

When an article is published we post the peer reviewers' comments and the authors' responses online. We also post the versions of the paper that were used during peer review. These are the versions that the peer review comments apply to.

The versions of the paper that follow are the versions that were submitted during the peer review process. They are not the versions of record or the final published versions. They should not be cited or distributed as the published version of this manuscript.

BMJ Open is an open access journal and the full, final, typeset and author-corrected version of record of the manuscript is available on our site with no access controls, subscription charges or pay-per-view fees (<http://bmjopen.bmj.com>).

If you have any questions on BMJ Open's open peer review process please email [info.bmjopen@bmj.com](mailto:info.bmjopen@bmj.com)

# BMJ Open

## School-based interventions for preventing substance use in Indigenous children ages 7-13: A scoping review protocol

|                               |                                                                                                                                                                                                                                                                                                                                                                                                                                                                                                                                      |
|-------------------------------|--------------------------------------------------------------------------------------------------------------------------------------------------------------------------------------------------------------------------------------------------------------------------------------------------------------------------------------------------------------------------------------------------------------------------------------------------------------------------------------------------------------------------------------|
| Journal:                      | <i>BMJ Open</i>                                                                                                                                                                                                                                                                                                                                                                                                                                                                                                                      |
| Manuscript ID                 | bmjopen-2019-034032                                                                                                                                                                                                                                                                                                                                                                                                                                                                                                                  |
| Article Type:                 | Protocol                                                                                                                                                                                                                                                                                                                                                                                                                                                                                                                             |
| Date Submitted by the Author: | 03-Sep-2019                                                                                                                                                                                                                                                                                                                                                                                                                                                                                                                          |
| Complete List of Authors:     | Maina , Geoffrey; University of Saskatchewan, College of Nursing<br>Phaneuf, Taryn; University of Saskatchewan College of Nursing<br>Kennedy, Megan ; University of Saskatchewan Health Sciences Library<br>Mclean, Maeve ; University of Saskatchewan College of Graduate Studies and Research, Public Health<br>Gakumo, Ann ; University of Massachusetts Boston, Nursing<br>Nguemo, Joseph; Ryerson University, Daphne Cockwell School of Nursing;<br>King , Alexandra ; University of Saskatchewan College of Medicine, Medicine |
| Keywords:                     | alcohol, substance use, addiction, elementary schools, prevention                                                                                                                                                                                                                                                                                                                                                                                                                                                                    |
|                               |                                                                                                                                                                                                                                                                                                                                                                                                                                                                                                                                      |

SCHOLARONE™  
Manuscripts

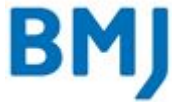

I, the Submitting Author has the right to grant and does grant on behalf of all authors of the Work (as defined in the below author licence), an exclusive licence and/or a non-exclusive licence for contributions from authors who are: i) UK Crown employees; ii) where BMJ has agreed a CC-BY licence shall apply, and/or iii) in accordance with the terms applicable for US Federal Government officers or employees acting as part of their official duties; on a worldwide, perpetual, irrevocable, royalty-free basis to BMJ Publishing Group Ltd ("BMJ") its licensees and where the relevant Journal is co-owned by BMJ to the co-owners of the Journal, to publish the Work in this journal and any other BMJ products and to exploit all rights, as set out in our [licence](#).

The Submitting Author accepts and understands that any supply made under these terms is made by BMJ to the Submitting Author unless you are acting as an employee on behalf of your employer or a postgraduate student of an affiliated institution which is paying any applicable article publishing charge ("APC") for Open Access articles. Where the Submitting Author wishes to make the Work available on an Open Access basis (and intends to pay the relevant APC), the terms of reuse of such Open Access shall be governed by a Creative Commons licence – details of these licences and which [Creative Commons](#) licence will apply to this Work are set out in our licence referred to above.

Other than as permitted in any relevant BMJ Author's Self Archiving Policies, I confirm this Work has not been accepted for publication elsewhere, is not being considered for publication elsewhere and does not duplicate material already published. I confirm all authors consent to publication of this Work and authorise the granting of this licence.

1  
2  
3 **School-based interventions for preventing substance use in**  
4 **Indigenous children ages 7-13: A scoping review protocol**

5  
6 **Authors:**

- 7  
8 1. \*Dr. Geoffrey Maina, Assistant Professor, College of Nursing, University of Saskatchewan.  
9 210-1301 Central Avenue, Prince Albert, S5V 4W1 SK.

10  
11 Tel: 306-765-3887; email: [geoffrey.maina@usask.ca](mailto:geoffrey.maina@usask.ca)

- 12  
13 2. Taryn Phaneuf, Undergraduate Nursing student, College of Nursing, University of  
14 Saskatchewan. Email: [tlp044@mail.usask.ca](mailto:tlp044@mail.usask.ca)  
15  
16 3. Megan Kennedy, Former Librarian, Leslie & Irene Dubé Health Sciences Library, University of  
17 Saskatchewan. Email: [megan.kennedy@usask.ca](mailto:megan.kennedy@usask.ca).  
18  
19 4. Maeve Mclean, Graduate student, Master of Public Health, University of Saskatchewan,  
20 Saskatoon Campus. [Maeve.mclean@usask.ca](mailto:Maeve.mclean@usask.ca)  
21  
22 5. Dr. Ann Gakumo, Associate Professor of Nursing, University of Massachusetts, Boston. Email:  
23 [ann.gakumo@umb.edu](mailto:ann.gakumo@umb.edu)  
24  
25 6. Dr. Joseph D. Nguemo Djiometio, weSpeak Postdoc fellow, Daphne Cockwell School of  
26 Nursing, Faculty of Community Services, Ryerson University. Email:  
27 [jnguemodjiometio@ryerson.ca](mailto:jnguemodjiometio@ryerson.ca)  
28  
29 7. Dr. Alexandra King, Cameco Chair in Indigenous Health, University of Saskatchewan. Email:  
30 [alexandra.king@usask.ca](mailto:alexandra.king@usask.ca)  
31

32  
33  
34 \* Corresponding author: Dr. Geoffrey Maina  
35  
36  
37  
38  
39  
40  
41  
42  
43  
44  
45  
46  
47  
48  
49  
50  
51  
52  
53  
54  
55  
56  
57  
58  
59  
60

## Abstract

**Introduction:** Throughout the world, Indigenous peoples share traumatic colonial experiences that have caused gross inequalities for them and continue to impact every aspect of their lives. The effect of intergenerational trauma and other health disparities have been remarkable for Indigenous children and adolescents, who are at a greater risk of adverse mental health and addiction outcomes compared to non-Indigenous people of the same age. Most Indigenous children are exposed to addictive substances at an early age which often leads to early initiation of substance use and is associated with subsequent physical and mental health issues, poor social and relational functioning, and occupational and legal problems.

**Aim:** The aim of this scoping review is to examine and map the evidence on school-based interventions for substance use prevention in Indigenous children ages 7-13 living in Canada, the US, Australia, and New Zealand.

**Research questions:** This scoping review seeks to answer the following questions: 1) What is known about Indigenous school-based interventions for preventing substance use 2) What are the characteristics and outcomes of school-based interventions for preventing substance use?

**Methods:** This scoping review will use steps described by Arksey and O'Malley (2005) & Levac, Colquhoun, & O'Brien (2010): (1) identifying the research question(s); (2) identifying relevant studies; (3) selecting the studies; (4) charting the data; (5) collating, summarizing and reporting the results; and (6) consulting with experts. Our findings will be reported according to the guidelines set by the Preferred Reporting Items for Systematic Reviews and Meta-Analyses extension for Scoping Reviews (PRISMA-ScR).

**Conclusion:** This study will contribute to a better understanding of the types and outcomes of school-based interventions aimed at preventing early substance use in Indigenous children in Canada. This information is critical for improving interventions and protecting vulnerable Indigenous youth from the devastating long-term impacts of early substance use.

## Article summary

### Strengths and limitations of this study

- This scoping review will lead to a better understanding of the nature, characteristics and outcomes of interventions for Indigenous pre-teen alcohol and substance use prevention.
- This review will highlight the critical need for early interventions for alcohol and substance use prevention, given the complexities of substance use disorder treatment.
- This study is limited to literature published in English between 2009 and 2019.
- This study is also limited to research in Canada, the US, Australia, and New Zealand, and the findings will only be relevant to these countries.

Key words: alcohol; substance use; addiction; prevention; elementary school; Indigenous

## Background

1  
2  
3  
4  
5  
6  
7  
8  
9  
10  
11  
12  
13  
14  
15  
16  
17  
18  
19  
20  
21  
22  
23  
24  
25  
26  
27  
28  
29  
30  
31  
32  
33  
34  
35  
36  
37  
38  
39  
40  
41  
42  
43  
44  
45  
46  
47  
48  
49  
50  
51  
52  
53  
54  
55  
56  
57  
58  
59  
60

Indigenous peoples worldwide share traumatic colonial experiences that continue to impact every aspect of their lives (1, 2). These historical socio-political processes have been attributed to causing gross inequalities for this population(3). In Canada, residential school experiences of physical, sexual, and emotional violence, along with other legacies of colonisation, have had dramatic and far-reaching impacts that continue to cause negative health consequences for Indigenous people (4). The resultant intergenerational trauma, which gets institutionalised within the family and the community, is associated with increased risks of mental health problems and addictions(5–7).

Indigenous peoples carry a disproportionate burden of harms associated with substance use (8). For example, compared to non-Indigenous injection drug users, Indigenous injection drug users are more likely to be infected with HIV and Hepatitis C and are less likely to receive treatment for substance use or have the support needed to remain on treatment(9,10). The rates of opioid use and opioid use disorder, as well as associated mortality and morbidity, are higher among Indigenous peoples compared to the general population. Furthermore, Indigenous youth, young adults, and young mothers are disproportionately affected by the opiate emergency(11–13).

The socio-political factors that arose from colonial practices against Indigenous people have also produced significant personal and structural barriers to health services (3). For example, Indigenous people often experience racism in the health care system, limiting their access to health services (14).

The effect of intergenerational trauma and other health disparities have been remarkable for Indigenous children and adolescents, who are at a greater risk of adverse mental health outcomes (15). Suicide rates among Indigenous children and youth in Canada are three times higher (24.8 deaths per 100 000 people) compared to non-Indigenous people (16). These rates are double for those living on reserve (6 times higher) and are nine times higher for the Inuit population (16).

1  
2  
3 2019). Alcohol and substance misuse are risk factors for both committing and attempting suicide  
4  
5 (17).  
6

7 About 20% of indigenous youth use substance use, of which 33% are under the age of 15  
8  
9 years (18). These early exposures frequently occur in the children's homes and communities. For  
10  
11 example, a Statistics Canada (19) report on Indigenous persons found that 35% of First Nation  
12  
13 people living off reserve, 30% of Metis, and 39% of Inuit reported heavy drinking at least once a  
14  
15 month for the past year, compared to 23% of non-Indigenous people. Further, 34.5% of First Nations  
16  
17 adults reported drinking alcohol two to three times a month, 17.9% drank two to three times a  
18  
19 week, and 3.2% drank daily (11). Roughly two-thirds (63.6%) of First Nations adults who had  
20  
21 consumed alcohol in the past 12 months meet the criteria for heavy drinking, with 16.0% reporting  
22  
23 heavy drinking weekly (11).  
24  
25  
26

27 Early initiation of substance use is associated with development later in life of substance-use  
28  
29 related mental health issues, poor social and relational functioning, and legal and occupational  
30  
31 problems (20–22). Early onset of substance use may be a manifestation of an underlying  
32  
33 vulnerability towards addictive behaviours or exposures to environmental conditions that increase  
34  
35 or reinforce an individual's propensity towards substance use problems later in life (23–26). For  
36  
37 instance, adolescents that use one class of substances, such as alcohol or tobacco, are more likely to  
38  
39 progress to other illicit substances such as cannabis, methamphetamine, or cocaine (20,24,27,28).  
40  
41 Disruption of brain development in adolescents using substances can increase risk of substance use  
42  
43 disorders later in life (29). Early use of alcohol and substances can also complicate treatment  
44  
45 outcomes for clients, who often manifest with physical and mental impacts of chronic poly-  
46  
47 substance use (10).  
48  
49  
50

#### 51 **School as an ideal setting for implementing substance use interventions for this population**

52  
53 Chen, Storr, & Anthony (20) have established a link between the early onset of substance  
54  
55 use and a greater propensity for substance use disorders later in life. Numerous studies suggest that  
56  
57 the rate of substance use increases during adolescence, peaks in young adulthood, and decreases in  
58  
59  
60



1  
2  
3 subsequent years(30,31). Delaying the onset of substance use can therefore minimize the trajectory  
4  
5 of substance use during adolescence and prevent the development of substance use disorders in  
6  
7 adulthood (32,33).  
8  
9

10 Elementary schools are a primary setting where pre-adolescent problems arise and where  
11 they can be prevented. School-based prevention programs can target large numbers of pre-  
12 adolescents in a relatively cost-effective and efficient manner (34). Randomised control trials have  
13  
14 been central to legitimizing school-based substance use prevention programs(35,36). Reviews of  
15  
16 these trials have found that evidence-based programming in schools is effective in preventing the  
17  
18 early onset of substance use and the escalation of substance use in adolescence ((37,38).(39)  
19  
20  
21  
22

23 Effective school-based programs often involve social-emotional learning competencies,  
24  
25 cognitive-behavioural approaches, changes in school climate, and multi-year and multi-component  
26  
27 approaches (40). Efforts such as these may delay or prevent the onset of substance use among pre-  
28  
29 adolescents.  
30  
31

32 There is a critical need to understand how to design and implement effective school-based  
33  
34 interventions for substance use prevention aimed at Indigenous youth ages 7 -13. This scoping  
35  
36 review aims to explore the research from Canada, the US, Australia, and New Zealand on types of  
37  
38 interventions and their outcomes.  
39  
40

## 41 **Methods**

42  
43 Scoping review methodology has proven to be very useful for investigating the extent of the  
44  
45 research in a given topic area. This type of synthesis review methodology was selected because of its  
46  
47 rigorous and methodical approach that allows for openly framed research questions. Further, it was  
48  
49 important that this review not be limited to only one evidence type (e.g., only randomized controlled  
50  
51 trials), as our preliminary search determined that the literature included a variety of qualitative  
52  
53 evidence sources.  
54  
55

56  
57 To ensure accurate and thorough reporting, the scoping review will be conducted following  
58  
59 the six-stage approach described by (41) and refined by Levac, Colquhoun, & O'Brien (42): (1)  
60

1  
2  
3 Identifying the research question(s), (2) identifying relevant studies, (3) selecting the studies, (4)  
4 charting the data, (5) collating, summarizing, and reporting the results, and (6) consulting with  
5 experts. Further, the review will be reported using guidelines from the Preferred Reporting Items for  
6 Systematic reviews and Meta-Analyses extension for Scoping Reviews (PRISMA-ScR).  
7  
8  
9

### 10 **Stage 1: Identifying the Research Questions**

11  
12 To start, the research team identified one broad research question: 1) What is known about  
13 indigenous school-based interventions for preventing substance use prevention? We chose to focus  
14 on this population because GM's research indicating that clients with addictions had been exposed  
15 to substances at a very young age (10). The librarian (MK) ran a trial search to determine feasibility  
16 of this research question. Following Arksey and O'Malley (41), our research question was refined as  
17 we became more familiar with the literature. Aiming to carefully examine and map the evidence on  
18 school-based interventions for preventing substance use in Indigenous children ages 7-13, we  
19 developed the following research questions:  
20  
21  
22  
23  
24  
25  
26  
27  
28  
29  
30

- 31 1. What is known about Indigenous school-based interventions for preventing substance use?
- 32 2. What are the characteristics and outcomes of school-based interventions for preventing  
33 substance use?  
34  
35  
36  
37  
38

### 39 **Stage 2: Identifying Relevant Studies**

40  
41 As scoping reviews allow for flexibility in evidence type, our review will not be limited to any  
42 specific qualitative or quantitative study design. To efficiently conduct searches in electronic  
43 databases, some parameters are needed to help guide the search strategy.  
44  
45  
46  
47

#### 48 **Eligibility Criteria**

49  
50 The following inclusion criteria were identified and used to guide the searches and review  
51 the articles: 1) Only English language articles published between 2009-2019 will be included; 2) The  
52 population targeted in the studies will be primarily Indigenous children ages 7-13 living in North  
53 America (Canada or US), Australia, or New Zealand; 3) Studies that comment on mixed-age  
54 populations of Indigenous children and adolescents will be included for full-text analysis to further  
55  
56  
57  
58  
59  
60

1  
2  
3 explore their suitability for inclusion; 4) Studies will be discussing or presenting the intervention or  
4 the results of interventions for school-based substance use prevention for this target population;  
5  
6 the results of interventions for school-based substance use prevention for this target population;  
7  
8 and 5) Concepts related to substance use prevention and age group (children) will be found in  
9  
10 either the title or abstract during the screening phase.

### 11 **Exclusion Criteria**

12  
13  
14 The following exclusion criteria were identified: 1) Articles discussing interventions for addictions  
15  
16 such as smoking, gambling, internet/social media/technology, and 2) articles discussing a population  
17  
18 of mixed ages and adults (ages 18+)

### 19 **Database searches**

20  
21  
22  
23 An experienced health sciences librarian, familiar with evidence synthesis and reporting, will  
24  
25 establish and test the search strategy in MEDLINE. The following electronic databases will be  
26  
27 searched for published literature: MEDLINE in-process and other nonindexed citations (Ovid) – 1946  
28  
29 – Present; PubMed – 1966 – Present; EMBASE Classic (Ovid) – 1947 – Present; Cumulative Index of  
30  
31 Nursing and Allied Health Literature (CINAHL) (EBSCO) – 1937 – Present; Educational Resources  
32  
33 Information Center (ERIC) (Ovid) – 1965 – Present; Scopus (Elsevier) – 1970 – Present; and Cochrane  
34  
35 Library (Wiley).

36  
37  
38  
39 In consultation with the research team, the librarian will identify relevant keywords. Controlled  
40  
41 vocabulary will be used to enhance sensitivity and specificity within the search. The results from  
42  
43 each database search will be documented and saved, and references will be imported into EndNote,  
44  
45 a bibliographic management software. Following the removal of duplicate references from EndNote,  
46  
47 references will be imported into Rayyan, a review software ((43) for title and abstract screening.  
48  
49 Google Forms will be used to collect data during full-text analysis.

50  
51  
52 With input from the research team, the health sciences librarian developed a MEDLINE  
53  
54 strategy for the search. This preliminary search was developed and run to determine the feasibility  
55  
56 of the scoping review and inform the searches in additional databases. To facilitate retrieval of  
57  
58 relevant articles, the search was limited by language (English) and publication date (2009-2019). See  
59  
60

1  
2  
3 Appendix A for full MEDLINE search strategies. In addition to searching electronic databases, we will  
4  
5 develop a web search for relevant grey literature. We will also check reference lists of included  
6  
7 studies to identify any that had not been found in our other searches.  
8  
9

### 10 **Stage 3: Study selection**

11  
12 Rayyan will be used for the title/abstract screening process. The research team will identify  
13  
14 inclusion/exclusion keywords. Two reviewers will independently review all articles. Should these 2  
15  
16 reviewers not reach a consensus, a third reviewer will complete the title and abstract screening. This  
17  
18 process will be repeated during the full-text analysis; however, the mechanism for recording data  
19  
20 and reviewing full-text articles will be by EndNote. Google survey will be used to collect data (see  
21  
22 below, "Charting the data").  
23  
24

### 25 **Stage 4: Charting the data**

26  
27 Review data extracted into a Google survey will include a) author(s), title, year of publication, b) age  
28  
29 groups of target population, c) Indigenous population identified, including the country of residence,  
30  
31 d) summary of intervention characteristics, and e) intervention outcomes (Yes/No).  
32  
33

### 34 **Stage 5: Collating, summarizing, and reporting the results**

35  
36 The purpose of a scoping review is to map and aggregate findings to present an overview of the  
37  
38 topic. Accordingly, we plan to a) map the results (main sources, locations, and quantity), b) provide  
39  
40 a descriptive summary and qualitative analysis, c) identify conceptual definitions, d) provide a  
41  
42 glossary of terms to clarify definitions found in the literature, and e) report our results using the  
43  
44 PRISMA-ScR guidelines for scoping reviews to enhance transparency and reproducibility. Because  
45  
46 this is a scoping review, we will not appraise the quality of the studies or offer statistical analysis.  
47  
48

### 49 **Stage 6: Consulting**

50  
51 We will seek and incorporate community engagement advice from an advisory group comprised of  
52  
53 an elder, a knowledge keeper, elementary school leadership, and community members. We  
54  
55 anticipate that this consultation will lead to a knowledge translation event where our findings will be  
56  
57 shared with a community chosen by the committee.  
58  
59  
60

## Results

The searches, title, and abstract screening are now complete. In the coming months, two independent reviewers will conduct full-text analyses. During the process of full-text screening, we will also extract data from the marked studies. We expect the scoping review to be completed by late 2019/early 2020.

## Discussion

Understanding interventions to prevent substance use among Indigenous youth aged 7-13 is vital to addressing substance use and addictions in the Indigenous population as whole. The problem of substance use and addictions cannot be overstated: evidence shows that early exposure to substance use leads to life-long poly-substance use, which not only causes complex comorbid conditions that are difficult and expensive to treat, but also severely impacts the quality of life of these individuals and their families.

The proposed scoping review has the potential to influence future policy, programs, and services supporting the health and well being of Indigenous youth in Canada and beyond. It will describe the nature and value of early strategies to prevent substance use in this group, and it will provide exemplars of interventions that can be implemented in a Canadian, Australian, New Zealand, US settings.

## Reference

1. Gracey, M., & King M. Indigenous health part 1: Determinants and disease patterns. *Lancet*. 2009;374:65 – 75.
2. Reid, J., Taylor-Moore, K., & Varona G. Towards a social-structural model for understanding current disparities in Maori health and well-being. *J Loss Trauma*. 2014;19(6):514–36.
3. Zambas, S. I., & Wright J. Impact of colonialism on Māori and Indigenous healthcare access: a discussion paper. *Contemp Nurse*. 2016;52(4):398–409.
4. Bombay A, Matheson K, Anisman H. The intergenerational effects of Indian Residential

- 1  
2  
3 Schools: Implications for the concept of historical trauma. *Transcult Psychiatry* [Internet].  
4  
5 2014 Jun 24;51(3):320–38. Available from:  
6  
7 <http://journals.sagepub.com/doi/10.1177/1363461513503380>  
8  
9
- 10 5. Marsh TN, Coholic D, Cote-Meek S, Najavits LM. Blending Aboriginal and Western healing  
11  
12 methods to treat intergenerational trauma with substance use disorder in Aboriginal peoples  
13  
14 who live in Northeastern Ontario, Canada. *Harm Reduct J* [Internet]. 2015 Dec 20;12(1):14.  
15  
16 Available from: <http://www.harmreductionjournal.com/content/12/1/14>  
17  
18
- 19 6. M G. The role of dependency and colonialism in generation trauma in First Nations citizens:  
20  
21 The James Bay Cree. In: Y D, editor. *Intergenerational handbook of multigenerational legacies*  
22  
23 of trauma. New York: Plenum Press; 1998. p. 355–71.  
24
- 25 7. Ross A, Dion J, Cantinotti M, Collin-Vézina D, Paquette L. Impact of residential schooling and  
26  
27 of child abuse on substance use problem in Indigenous Peoples. *Addict Behav* [Internet]. 2015  
28  
29 Dec;51:184–92. Available from:  
30  
31 <https://linkinghub.elsevier.com/retrieve/pii/S0306460315002701>  
32  
33
- 34 8. Urbanoski KA. Need for equity in treatment of substance use among Indigenous people in  
35  
36 Canada. *Can Med Assoc J* [Internet]. 2017 Nov 6;189(44):E1350–1. Available from:  
37  
38 <http://www.cmaj.ca/lookup/doi/10.1503/cmaj.171002>  
39  
40
- 41 9. Population Health Branch M of H. HIV Prevention and Control Program Report for 2015.  
42  
43 2016.  
44
- 45 10. Maina G, Crizzle A, Maposa S, Fournier B. Sociodemographic Profiles and Clinical Outcomes  
46  
47 for Clients on Methadone Maintenance Treatment in a Western Canadian Clinic. *J Forensic*  
48  
49 *Nurs* [Internet]. 2019 Jul;1. Available from: [http://insights.ovid.com/crossref?an=01263942-](http://insights.ovid.com/crossref?an=01263942-900000000-00001)  
50  
51 [900000000-00001](http://insights.ovid.com/crossref?an=01263942-900000000-00001)  
52  
53
- 54 11. Centre FNIG. *First Nations Regional Health Survey (RHS) 2008/10: National report on adults,*  
55  
56 *youth and children living in First Nations communities.* Ottawa; 2012.  
57  
58
- 59 12. Russell, C., Firestone, M., Kelly, L., Mushquash, C., Fischer B. Prescription opioid prescribing,  
60

- 1  
2  
3 use/misuse, harms and treatment among Indigenous people in Canada: a narrative review of  
4 available data and indicators. *Rural Remote Heal.* 2016;16(14):3974.  
5  
6  
7  
8 13. Kanate D, Folk D, Cirone S, Gordon J, Kirlew M, Veale T, Bocking N, Rea S KL. Community-wide  
9 measures of wellness in a remote First Nations community experiencing opioid dependence:  
10 evaluating outpatient buprenorphine-naloxone substitution therapy in the context of a First  
11 Nations healing program. *Can Fam Physician.* 2016;61(2):160–5.  
12  
13  
14  
15  
16 14. Herring, S., Spangaro, J., Lauw, M., & McNamara L (2013). The intersection of trauma, racism,  
17 and cultural competence in effective work with Indigenous people: Waiting for trust. *Aust Soc*  
18 *Work.* 2013;66(1):104–17.  
19  
20  
21  
22  
23 15. Journal. CKC. Colonialism as a broader social determinant of health. *Int Indig Policy.*  
24 2011;2(1):5.  
25  
26  
27  
28 16. Canada S. Suicide among First Nations people, Metis and Inuit (2011-2016): Findings from the  
29 2011 Canadian Census Health and Environment Cohort (CanCHEC). [Internet]. 2019. Available  
30 from: <https://www150.statcan.gc.ca/n1/pub/99-011-x/99-011-x2019001-eng.htm>  
31  
32  
33  
34 17. Prevention C for DC and. Suicide Risks and Protective Factors. [Internet]. 2018. Available  
35 from: <https://www.cdc.gov/violenceprevention/suicide/riskprotectivefactors.html>  
36  
37  
38  
39 18. Jetty R. Tobacco use and misuse among Indigenous children and youth in Canada. *Paediatr*  
40 *Child Health.* 22(7):395–9.  
41  
42  
43 19. Statistics Canada. Indigenous Peoples: Fact Sheet for Canada [Internet]. 2015. Available from:  
44 <https://www150.statcan.gc.ca/n1/pub/89-656-x/89-656-x2015001-eng.htm>  
45  
46  
47  
48 20. Moss HB, Chen CM, Yi H. Early adolescent patterns of alcohol, cigarettes, and marijuana  
49 polysubstance use and young adult substance use outcomes in a nationally representative  
50 sample. *Drug Alcohol Depend* [Internet]. 2014 Mar;136:51–62. Available from:  
51 <https://linkinghub.elsevier.com/retrieve/pii/S0376871613005279>  
52  
53  
54  
55  
56 21. U.S. Department of Health and Human Services (HHS) SA and M, (SAMHSA) HSA. No Title  
57 [Internet]. 2017. Available from:  
58  
59  
60

- 1  
2  
3 [https://alcoholpolicy.niaaa.nih.gov/sites/default/files/imce/users/u1743/stop\\_act\\_rtc\\_2017.](https://alcoholpolicy.niaaa.nih.gov/sites/default/files/imce/users/u1743/stop_act_rtc_2017.pdf)  
4  
5 pdf  
6  
7  
8 22. Swahn MH, Bossarte RM, Ashby JS, Meyers J. Pre-teen alcohol use initiation and suicide  
9  
10 attempts among middle and high school students: Findings from the 2006 Georgia Student  
11  
12 Health Survey. *Addict Behav* [Internet]. 2010 May;35(5):452–8. Available from:  
13  
14 <https://linkinghub.elsevier.com/retrieve/pii/S030646030900344X>  
15  
16  
17 23. King KM, Chassin L. A Prospective Study of the Effects of Age of Initiation of Alcohol and Drug  
18  
19 Use on Young Adult Substance Dependence\*. *J Stud Alcohol Drugs* [Internet]. 2007  
20  
21 Mar;68(2):256–65. Available from: <http://www.jsad.com/doi/10.15288/jsad.2007.68.256>  
22  
23  
24 24. Kirisci L, Tarter R, Ridenour T, Zhai ZW, Fishbein D, Reynolds M, et al. Age of alcohol and  
25  
26 cannabis use onset mediates the association of transmissible risk in childhood and  
27  
28 development of alcohol and cannabis disorders: Evidence for common liability. *Exp Clin*  
29  
30 *Psychopharmacol* [Internet]. 2013;21(1):38–45. Available from:  
31  
32 <http://doi.apa.org/getdoi.cfm?doi=10.1037/a0030742>  
33  
34  
35 25. Hicks JA, Friedman RS, Gable PA, Davis WE. Interactive effects of approach motivational  
36  
37 intensity and alcohol cues on the scope of perceptual attention. *Addiction* [Internet]. 2012  
38  
39 Jun;107(6):1074–80. Available from: <http://doi.wiley.com/10.1111/j.1360-0443.2012.03781.x>  
40  
41  
42 26. Kennett J, Vincent NA, Snoek A. Drug Addiction and Criminal Responsibility. In: *Handbook of*  
43  
44 *Neuroethics* [Internet]. Dordrecht: Springer Netherlands; 2015. p. 1065–83. Available from:  
45  
46 [http://link.springer.com/10.1007/978-94-007-4707-4\\_71](http://link.springer.com/10.1007/978-94-007-4707-4_71)  
47  
48  
49 27. Degenhardt L, Randall D, Hall W, Law M, Butler T, Burns L. Mortality among clients of a state-  
50  
51 wide opioid pharmacotherapy program over 20 years: Risk factors and lives saved. *Drug*  
52  
53 *Alcohol Depend* [Internet]. 2009 Nov;105(1–2):9–15. Available from:  
54  
55 <https://linkinghub.elsevier.com/retrieve/pii/S0376871609002300>  
56  
57  
58 28. Sartor CE, Waldron M, Duncan AE, Grant JD, McCutcheon V V., Nelson EC, et al. Childhood  
59  
60 sexual abuse and early substance use in adolescent girls: the role of familial influences.



- 1  
2  
3  
4  
5  
6  
7  
8  
9  
10  
11  
12  
13  
14  
15  
16  
17  
18  
19  
20  
21  
22  
23  
24  
25  
26  
27  
28  
29  
30  
31  
32  
33  
34  
35  
36  
37  
38  
39  
40  
41  
42  
43  
44  
45  
46  
47  
48  
49  
50  
51  
52  
53  
54  
55  
56  
57  
58  
59  
60
- Addiction [Internet]. 2013 May;108(5):993–1000. Available from:  
<http://doi.wiley.com/10.1111/add.12115>
29. Chambers RA, Taylor JR, Potenza MN. Developmental Neurocircuitry of Motivation in Adolescence: A Critical Period of Addiction Vulnerability. *Am J Psychiatry* [Internet]. 2003 Jun;160(6):1041–52. Available from:  
<http://psychiatryonline.org/doi/abs/10.1176/appi.ajp.160.6.1041>
30. Bachman, J. G., O'Malley, P. M., Schulenberg, J. E., Johnston, L. D., Bryant, A. L., & Merline AC. The decline of substance use in young adulthood: Changes in social activities, roles, and beliefs. Mahwah, NJ, US: Lawrence Erlbaum Associates Publishers.; 2002.
31. Hammond, C. J., Mayes, L. C., & Potenza MN. Neurobiology of adolescent substance use and addictive behaviors: prevention and treatment implications. *Adolescent medicine. State Arts Rev.* 2014;25(1):15.
32. Lee C-YS, Winters KC, Wall MM. Trajectories of Substance Use Disorders in Youth: Identifying and Predicting Group Memberships. *J Child Adolesc Subst Abuse* [Internet]. 2010 Mar 26;19(2):135–57. Available from:  
<http://www.tandfonline.com/doi/abs/10.1080/10678281003634975>
33. Jordan CJ, Andersen SL. Sensitive periods of substance abuse: Early risk for the transition to dependence. *Dev Cogn Neurosci* [Internet]. 2017 Jun;25:29–44. Available from:  
<https://linkinghub.elsevier.com/retrieve/pii/S1878929316301931>
34. Miller, T.R. and HD. How should governments spend the drug prevention dollar: A buyer's guide. In: Stockwell, T., Gruenewald, P., Toumbourou, J., and Loxley W, editor. Preventing harmful substance use: The evidence base for policy and practice. England: John Wiley & Sons.; 2005. p. 415–31.
35. Faggiano F, Vigna-Taglianti F, Burkhart G, Bohrn K, Cuomo L, Gregori D, et al. The effectiveness of a school-based substance abuse prevention program: 18-Month follow-up of the EU-Dap cluster randomized controlled trial. *Drug Alcohol Depend* [Internet]. 2010

- 1  
2  
3 Apr;108(1–2):56–64. Available from:  
4  
5 <https://linkinghub.elsevier.com/retrieve/pii/S0376871609004384>  
6  
7
- 8 36. Caria MP, Faggiano F, Bellocco R, Galanti MR. Effects of a School-Based Prevention Program  
9  
10 on European Adolescents' Patterns of Alcohol Use. *J Adolesc Heal* [Internet]. 2011  
11  
12 Feb;48(2):182–8. Available from:  
13  
14 <https://linkinghub.elsevier.com/retrieve/pii/S1054139X10002673>  
15  
16
- 17 37. Griffin KW, Bang H, Botvin GJ. Age of alcohol and marijuana use onset predicts weekly  
18  
19 substance use and related psychosocial problems during young adulthood. *J Subst Use*  
20  
21 [Internet]. 2010 Jun 10;15(3):174–83. Available from:  
22  
23 <http://www.tandfonline.com/doi/full/10.3109/14659890903013109>  
24  
25
- 26 38. Salvo, N., Bennett, J., Cheung, A., Chen, Y., Rice, M., Rush, B., Bullock, H., Bowlby A.  
27  
28 Prevention of Of, substance use in children/adolescents with mental disorders: *Can Acad*  
29  
30 *Child Adolesc Psychiatry*. 2012;21(4):245–52.  
31  
32
- 33 39. Logan-Greene P, Semanchin Jones A. Predicting chronic neglect: Understanding risk and  
34  
35 protective factors for CPS-involved families. *Child Fam Soc Work* [Internet]. 2018  
36  
37 May;23(2):264–72. Available from: <http://doi.wiley.com/10.1111/cfs.12414>  
38  
39
- 40 40. Goldberg JM, Sklad M, Elfrink TR, Schreurs KMG, Bohlmeijer ET, Clarke AM. Effectiveness of  
41  
42 interventions adopting a whole school approach to enhancing social and emotional  
43  
44 development: a meta-analysis. *Eur J Psychol Educ* [Internet]. 2019 Oct 30;34(4):755–82.  
45  
46 Available from: <http://link.springer.com/10.1007/s10212-018-0406-9>  
47  
48
- 49 41. Arksey H, O'Malley L. Scoping studies: towards a methodological framework. *Int J Soc Res*  
50  
51 *Methodol* [Internet]. 2005 Feb;8(1):19–32. Available from:  
52  
53 <http://www.tandfonline.com/doi/abs/10.1080/1364557032000119616>  
54  
55
- 56 42. Levac D, Colquhoun H, O'Brien KK. Scoping studies: advancing the methodology. *Implement*  
57  
58 *Sci* [Internet]. 2010 Dec 20;5(1):69. Available from:  
59  
60 <http://implementationscience.biomedcentral.com/articles/10.1186/1748-5908-5-69>

- 1  
2  
3 43. Ouzzani M, Hammady H, Fedorowicz Z, Elmagarmid A. Rayyan—a web and mobile app for  
4 systematic reviews. Syst Rev [Internet]. 2016 Dec 5;5(1):210. Available from:  
5  
6  
7 <http://systematicreviewsjournal.biomedcentral.com/articles/10.1186/s13643-016-0384-4>  
8  
9  
10  
11  
12  
13  
14  
15  
16  
17  
18  
19  
20  
21  
22  
23  
24  
25  
26  
27  
28  
29  
30  
31  
32  
33  
34  
35  
36  
37  
38  
39  
40  
41  
42  
43  
44  
45  
46  
47  
48  
49  
50  
51  
52  
53  
54  
55  
56  
57  
58  
59  
60

For peer review only

### Contributions:

- Dr. Geoffrey Maina was involved in the conceptualisation and writing of the protocol.
- Taryn Phaneuf was involved in the literature search, writing the introductory section, and proofreading the protocol.
- Maeve Mclean was involved in the literature search, writing the introductory section, and proofreading the protocol.
- Megan Kennedy was involved in designing the search strategy and writing the methods section.
- Dr. Ann Gakumo was involved in editing and proofreading the manuscript.
- Dr. Joseph Nguemo was involved in editing and proofreading the manuscript.
- Dr. Alexandra King was involved in editing and proofreading the manuscript.

### Funding

This work was supported by the Faculty Recruitment and Retention Fund, University of Saskatchewan fund no. 419054.

**Conflicts of interests':** The authors have no conflicts of interest to declare.

Word count: 2080

## Appendix A

## Search Strategy – MEDLINE

The following search was run in Ovid MEDLINE on April 22, 2019:

|    |                                                                                                                                                                                                                        |  |
|----|------------------------------------------------------------------------------------------------------------------------------------------------------------------------------------------------------------------------|--|
| 1  | alaska natives/ or indians, central american/ or indians, north american/ or indians,<br>south american/ or inuits/                                                                                                    |  |
| 2  | Oceanic Ancestry Group/                                                                                                                                                                                                |  |
| 3  | (indigenous or Indigenous* or "first nation" or "first nations" or metis or native or<br>natives or "first people" or "first peoples" or "on reserve" or "off reserve" or inuit* or<br>eskimo* or maori*).ab,ti,kw,kf. |  |
| 4  | Health Services, Indigenous/                                                                                                                                                                                           |  |
| 5  | or/1-4                                                                                                                                                                                                                 |  |
| 6  | Child/                                                                                                                                                                                                                 |  |
| 7  | (children? or child? or young or youth? or juvenile? or kid or kids or underage* or<br>preteen* or preadolescen*).ab,ti,kw.                                                                                            |  |
| 8  | ((school or under) adj1 age*) or (pre adj1 (teen* or adolescen*))).ab,ti,kf                                                                                                                                            |  |
| 9  | ((elementary or primary or middle or grade or grammar or junior or secondary) adj1<br>school*).ab,ti,kf.                                                                                                               |  |
| 10 | "junior high".ab,ti,tw.                                                                                                                                                                                                |  |
| 11 | Schools/                                                                                                                                                                                                               |  |
| 12 | or/6-11                                                                                                                                                                                                                |  |
| 13 | 5 and 12                                                                                                                                                                                                               |  |
| 14 | exp Substance-Related Disorders/ed, pc, px [Education, Prevention & Control,<br>Psychology]                                                                                                                            |  |
| 15 | exp Alcohol-Related Disorders/pc, px [Prevention & Control, Psychology]                                                                                                                                                |  |
| 16 | exp Opioid-Related Disorders/pc, px [Prevention & Control, Psychology]                                                                                                                                                 |  |

|    |                                                                                                                                                                                                                               |  |
|----|-------------------------------------------------------------------------------------------------------------------------------------------------------------------------------------------------------------------------------|--|
| 17 | exp Prescription Drug Misuse/pc, px [Prevention & Control, Psychology]                                                                                                                                                        |  |
| 18 | or/ 14-17                                                                                                                                                                                                                     |  |
| 19 | Underage Drinking/                                                                                                                                                                                                            |  |
| 20 | Drug-Seeking Behavior/                                                                                                                                                                                                        |  |
| 21 | exp "Marijuana Use"/                                                                                                                                                                                                          |  |
| 22 | ((legal* or illegal* or prescription or illicit or street or club) adj1 (drug? or medication?)).ab,ti,kf.                                                                                                                     |  |
| 23 | ((binge or underage or "under age" or teen or adolescent?) adj1 (drink* or alcohol)).ab,ti,kf.                                                                                                                                |  |
| 24 | controlled substances/ or medical marijuana/ or prescription drugs/ or exp street drugs/ or exp synthetic drugs/                                                                                                              |  |
| 25 | exp "hypnotics and sedatives"/ or exp narcotics/ or exp analgesics, opioid/ or exp hallucinogens/ or performance-enhancing substances/                                                                                        |  |
| 26 | opium/ or (heroin or opium or smack or dope or horse or "china white").ab,ti,tw                                                                                                                                               |  |
| 27 | exp cannabinoids/ or cannabis/ or (marijuana or weed or pot or hash or hashish or ganja or blunt? or joint? or "mary jane" or reefer or CBD or cannbin* or cannabis).ab,ti,tw                                                 |  |
| 28 | Central Nervous System Stimulants/ or (cocaine or coke or "crack cocaine" or amphetamine? or methamphetamine? or meth or crank or speed or upper? or "club drug" or "club drugs" or MDMA or ecstasy or molly or GHB).ab,ti,tw |  |
| 29 | ketamine/ or phencyclidine/ or exp salvia/ or dextromethorphan/ or ("dissociative drugs" or "dissociative drug" or "special k" or PCP or "angel dust" or robotripping).ab,ti,tw.                                              |  |

|    |                                                                                                                                                                               |  |
|----|-------------------------------------------------------------------------------------------------------------------------------------------------------------------------------|--|
| 30 | mescaline/ or psilocybin/ or exp testosterone congeners/ or (hallucinogen* or LSD or acid or peyote or "magic mushrooms" or shrooms or "anabolic steroids" or roids).ab,ti,tw |  |
| 31 | nitrous oxide/ or (inhalant? or "laughing gas" or popper? or snapper? or whippets or huffing).ab,ti,tw                                                                        |  |
| 32 | Or/ 19-31                                                                                                                                                                     |  |
| 33 | (abus* or misus* or "inappropriate use").ab,ti,tw                                                                                                                             |  |
| 34 | (prevent* or intervention or intervene or program? or programme? or activit* or support* or initiative?).ab,ti,tw.                                                            |  |
| 35 | school health services/ or health education/ or health promotion/                                                                                                             |  |
| 36 | 34 or 35                                                                                                                                                                      |  |
| 37 | 32 and 33 and 36                                                                                                                                                              |  |
| 38 | 18 or 37                                                                                                                                                                      |  |
| 39 | 13 and 38                                                                                                                                                                     |  |
| 40 | limit 39 to (english language and yr="2009 -Current")                                                                                                                         |  |

# BMJ Open

## School-based interventions for preventing substance use in Indigenous children ages 7-13: A scoping review protocol

|                                 |                                                                                                                                                                                                                                                                                                                                                                                                                                                                                                                                                                                                                  |
|---------------------------------|------------------------------------------------------------------------------------------------------------------------------------------------------------------------------------------------------------------------------------------------------------------------------------------------------------------------------------------------------------------------------------------------------------------------------------------------------------------------------------------------------------------------------------------------------------------------------------------------------------------|
| Journal:                        | <i>BMJ Open</i>                                                                                                                                                                                                                                                                                                                                                                                                                                                                                                                                                                                                  |
| Manuscript ID                   | bmjopen-2019-034032.R1                                                                                                                                                                                                                                                                                                                                                                                                                                                                                                                                                                                           |
| Article Type:                   | Protocol                                                                                                                                                                                                                                                                                                                                                                                                                                                                                                                                                                                                         |
| Date Submitted by the Author:   | 22-Nov-2019                                                                                                                                                                                                                                                                                                                                                                                                                                                                                                                                                                                                      |
| Complete List of Authors:       | Maina , Geoffrey; University of Saskatchewan, College of Nursing<br>Phaneuf, Taryn; University of Saskatchewan College of Nursing<br>Kennedy, Megan ; University of Saskatchewan Health Sciences Library<br>Mclean, Maeve ; University of Saskatchewan College of Graduate Studies and Research, Public Health<br>Gakumo, Ann ; University of Massachusetts Boston, Nursing<br>Nguemo, Joseph; Ryerson University, Daphne Cockwell School of Nursing;<br>King , Alexandra ; University of Saskatchewan College of Medicine, Medicine<br>Mcharo, Solomon ; University of Saskatchewan College of Nursing, Nursing |
| <b>Primary Subject Heading</b>: | Addiction                                                                                                                                                                                                                                                                                                                                                                                                                                                                                                                                                                                                        |
| Secondary Subject Heading:      | Addiction, Public health                                                                                                                                                                                                                                                                                                                                                                                                                                                                                                                                                                                         |
| Keywords:                       | alcohol, substance use, addiction, elementary schools, prevention                                                                                                                                                                                                                                                                                                                                                                                                                                                                                                                                                |
|                                 |                                                                                                                                                                                                                                                                                                                                                                                                                                                                                                                                                                                                                  |

SCHOLARONE™  
Manuscripts





I, the Submitting Author has the right to grant and does grant on behalf of all authors of the Work (as defined in the below author licence), an exclusive licence and/or a non-exclusive licence for contributions from authors who are: i) UK Crown employees; ii) where BMJ has agreed a CC-BY licence shall apply, and/or iii) in accordance with the terms applicable for US Federal Government officers or employees acting as part of their official duties; on a worldwide, perpetual, irrevocable, royalty-free basis to BMJ Publishing Group Ltd ("BMJ") its licensees and where the relevant Journal is co-owned by BMJ to the co-owners of the Journal, to publish the Work in this journal and any other BMJ products and to exploit all rights, as set out in our [licence](#).

The Submitting Author accepts and understands that any supply made under these terms is made by BMJ to the Submitting Author unless you are acting as an employee on behalf of your employer or a postgraduate student of an affiliated institution which is paying any applicable article publishing charge ("APC") for Open Access articles. Where the Submitting Author wishes to make the Work available on an Open Access basis (and intends to pay the relevant APC), the terms of reuse of such Open Access shall be governed by a Creative Commons licence – details of these licences and which [Creative Commons](#) licence will apply to this Work are set out in our licence referred to above.

Other than as permitted in any relevant BMJ Author's Self Archiving Policies, I confirm this Work has not been accepted for publication elsewhere, is not being considered for publication elsewhere and does not duplicate material already published. I confirm all authors consent to publication of this Work and authorise the granting of this licence.

1  
2  
3 **School-based interventions for preventing substance use in Indigenous children ages 7-13: A**  
4  
5 **scoping review protocol**  
6  
7

8 **Authors:**  
9

- 10 1. \*Dr. Geoffrey Maina, Assistant Professor, College of Nursing, University of Saskatchewan.  
11  
12 210-1301 Central Avenue, Prince Albert, S5V 4W1 SK.  
13  
14 Tel: 306-765-3887; email: [geoffrey.maina@usask.ca](mailto:geoffrey.maina@usask.ca)  
15  
16 2. Taryn Phaneuf, Undergraduate Nursing student, College of Nursing, University of  
17  
18 Saskatchewan. Email: [tlp044@mail.usask.ca](mailto:tlp044@mail.usask.ca)  
19  
20 3. Megan Kennedy, Former Librarian, Leslie & Irene Dubé Health Sciences Library, University of  
21  
22 Saskatchewan. Email: [megan.kennedy@usask.ca](mailto:megan.kennedy@usask.ca).  
23  
24 4. Maeve Mclean, Graduate student, Master of Public Health, University of Saskatchewan,  
25  
26 Saskatoon Campus. [Maeve.mclean@usask.ca](mailto:Maeve.mclean@usask.ca)  
27  
28 5. Dr. Ann Gakumo, Associate Professor of Nursing, and Department Chair of Nursing,  
29  
30 University of Massachusetts, Boston. Email: [ann.gakumo@umb.edu](mailto:ann.gakumo@umb.edu)  
31  
32 6. Dr. Joseph D. Nguemo Djimetio, weSpeak Postdoc fellow, Daphne Cockwell School of  
33  
34 Nursing, Faculty of Community Services, Ryerson University. Email:  
35  
36 [jnguemodjimetio@ryerson.ca](mailto:jnguemodjimetio@ryerson.ca)  
37  
38 7. Dr. Alexandra King, Cameco Chair in Indigenous Health, University of Saskatchewan. Email:  
39  
40 [alexandra.king@usask.ca](mailto:alexandra.king@usask.ca)  
41  
42 8. Solomon Kasha Mcharo, PhD(c). College of Nursing, University of Saskatchewan. Saskatoon  
43  
44 Campus. Email: [kasha.mcharo@usask.ca](mailto:kasha.mcharo@usask.ca)  
45  
46  
47  
48  
49  
50  
51

52 \* Corresponding author: Dr. Geoffrey Maina  
53  
54  
55  
56  
57  
58  
59  
60

## Abstract

**Introduction:** Throughout the world, Indigenous peoples share traumatic colonial experiences that have caused gross inequalities for them and continue to impact every aspect of their lives. The effect of intergenerational trauma and other health disparities have been remarkable for Indigenous children and adolescents, who are at a greater risk of adverse mental health and addiction outcomes compared to non-Indigenous people of the same age. Most Indigenous children are exposed to addictive substances at an early age which often leads to early initiation of substance use and is associated with subsequent physical and mental health issues, poor social and relational functioning, and occupational and legal problems.

**Aim:** The aim of this paper is to report the protocol for the scoping review of school-based interventions for substance use prevention in Indigenous children ages 7-13 living in Canada, the US, Australia, and New Zealand.

**Research questions:** This scoping review seeks to answer the following questions: 1) What is known about Indigenous school-based interventions for preventing substance use 2) What are the characteristics and outcomes of school-based interventions for preventing substance use?

**Methods:** This scoping review will use steps described by Arksey and O'Malley (2005) & Levac, Colquhoun, & O'Brien (2010): (1) identifying the research question(s); (2) identifying relevant studies; (3) selecting the studies; (4) charting the data; (5) collating, summarizing and reporting the results; and (6) consulting with experts. Our findings will be reported according to the guidelines set by the Preferred Reporting Items for Systematic Reviews and Meta-Analyses extension for Scoping Reviews (PRISMA-ScR).

**Ethics and dissemination:** Ethics review approval is not required for this project. Findings from this study will be presented to lay public, at scientific conferences and published in a peer-reviewed journal.

## Article summary

### Strengths and limitations of this study

- This scoping review will lead to a better understanding of the nature, characteristics, and outcomes of interventions for Indigenous pre-teen alcohol and substance use prevention.
- This study is limited to literature published in English between January 2009 and December 2019.
- Since the scoping review aims to assess the research activity on a topic and not the quality of the research thereof, this project will provide an overview of all the intervention focussing on elementary school-based Indigenous substance use prevention.
- This study is also limited to research in Canada, the US, Australia, and New Zealand, and the findings will only be relevant to these countries.

Keywords: alcohol; substance use; addiction; prevention; elementary school; Indigenous

review only

## Background

Indigenous peoples worldwide share traumatic colonial experiences that continue to impact every aspect of their lives (1, 2). These historical socio-political processes have been attributed to causing gross inequalities for this population(3). Colonization, the imposition of colonial institutions and rules, and subsequent disruption of the Aboriginal way of life continue to have significant negative impacts on the lives and health of indigenous people. In Canada, residential school experiences of physical, sexual, and emotional violence, along with other legacies of colonization, have had dramatic and far-reaching impacts that continue to cause negative health consequences for Indigenous people (4). The resultant intergenerational trauma, which gets institutionalized within the family and the community, is associated with increased risks of mental health problems and addictions (5-11)

Colonization is now regarded as a determinant of health, as it impacts many aspects of Indigenous peoples' wellbeing (12). Moreover, in Canada, Aboriginal status is regarded as a determinant of health due to the numerous determinants of health they contend with, which are potentiated by colonial experiences (13-16). Thus, Indigenous peoples lag the general population in social, economic and health indicators (17, 18). Poverty, malnutrition, overcrowding, and inadequate health care services continue to impact the health of the indigenous people (19).

Indigenous peoples carry a disproportionate burden of harms associated with substance use (20). For example, compared to non-Indigenous injection drug users, Indigenous injection drug users are more likely to be infected with HIV and Hepatitis C and are less likely to receive treatment for substance use or have the support needed to remain on treatment (21,22). The rates of opioid use and opioid use disorder, as well as associated mortality and morbidity, are higher among Indigenous peoples compared to the general population. Furthermore, Indigenous youth, young adults, and young mothers are disproportionately affected by the opiate emergency (23-25).

The socio-political factors that arose from colonial practices against Indigenous people have also produced significant personal and structural barriers to health services (3). For example,

1  
2  
3 Indigenous people often experience racism in the health care system, limiting their access to health  
4 services (26).  
5  
6

7  
8 The effect of intergenerational trauma and other health disparities have been remarkable  
9  
10 for Indigenous children and adolescents, who are at a greater risk of adverse mental health  
11 outcomes (26). Suicide rates among Indigenous children and youth in Canada are three to five times  
12 compared to non-Indigenous people (27). Among the Inuit youth, suicide rates are 11 times higher  
13 than the national average. Alcohol and substance use are risk factors for both committing and  
14 attempting suicide (28-30).  
15  
16  
17  
18  
19

20  
21 About 20% of indigenous youth use substance use, of which 33% are under the age of 15  
22 years (31). These early exposures frequently occur in children's homes and communities. For  
23 example, a Statistics Canada (32) report on Indigenous persons found that 35% of First Nation  
24 people living off-reserve, 30% of Metis, and 39% of Inuit reported heavy drinking at least once a  
25 month for the past year, compared to 23% of non-Indigenous people. Further, 34.5% of First Nations  
26 adults reported drinking alcohol two to three times a month, 17.9% drank two to three times a  
27 week, and 3.2% drank daily (23). Roughly two-thirds (63.6%) of First Nations adults who had  
28 consumed alcohol in the past 12 months meet the criteria for heavy drinking, with 16.0% reporting  
29 heavy drinking weekly (23).  
30  
31  
32  
33  
34  
35  
36  
37  
38  
39

40  
41 Early initiation of substance use is associated with development later in life of substance-use  
42 related mental health issues, poor social and relational functioning, and legal and occupational  
43 problems (33-35). Early-onset of substance use may be a manifestation of an underlying vulnerability  
44 towards addictive behaviors or exposures to environmental conditions that increase or reinforce an  
45 individual's propensity towards substance use problems later in life (36-39). For instance,  
46 adolescents that use one class of substances, such as alcohol or tobacco, are more likely to progress  
47 to other illicit substances such as cannabis, methamphetamine, or cocaine (33,37,40,41). Disruption  
48 of brain development in adolescents using substances can increase risk of substance use disorders  
49  
50  
51  
52  
53  
54  
55  
56  
57  
58  
59  
60

1  
2  
3 later in life (42). Early use of alcohol and substances can also complicate treatment outcomes for  
4  
5 clients, who often manifest with physical and mental impacts of chronic poly-substance use (18).  
6

7  
8         Chen, Storr, & Anthony (42) have established a link between the early onset of substance  
9  
10 use and a greater propensity for substance use disorders later in life. Numerous studies suggest that  
11  
12 the rate of substance use increases during adolescence, peaks in young adulthood, and decreases in  
13  
14 subsequent years(43,44). Delaying the onset of substance use can, therefore, minimize the  
15  
16 trajectory of substance use during adolescence and prevent the development of substance use  
17  
18 disorders in adulthood (45,46). A study authored by GM, an author in this manuscript on clients  
19  
20 receiving methadone treatment for opiate use disorder, showed that clients were exposed to  
21  
22 diverse substances at an early age- alcohol 6 years, marijuana, 7 years, Dilaudid, morphine, and  
23  
24 cocaine (11 years), ritatin (8 years) and valium (13years). Considering this early exposure to  
25  
26 substance use, and the difficult these clients faced on opiate replacement therapy treatment, a need  
27  
28 was expressed to explore substance use prevention for this age group.  
29  
30  
31

32  
33         Elementary schools are a primary setting where pre-adolescent problems arise and where  
34  
35 they can be prevented. School-based prevention programs can target large numbers of pre-  
36  
37 adolescents in a relatively cost-effective and efficient manner (47). Randomized control trials have  
38  
39 been central to legitimizing school-based substance use prevention programs(48,49). Reviews of  
40  
41 these trials have found that evidence-based programming in schools is effective in preventing the  
42  
43 early onset of substance use and the escalation of substance use in adolescence (50-52).  
44

45  
46         Effective school-based programs often involve social-emotional learning competencies,  
47  
48 cognitive-behavioral approaches, changes in school climate, and multi-year and multi-component  
49  
50 approaches (53). Efforts such as these may delay or prevent the onset of substance use among pre-  
51  
52 adolescents.  
53

54  
55         There is a critical need to understand how to design and implement effective school-based  
56  
57 interventions for substance use prevention aimed at Indigenous youth ages 7 -13. This scoping  
58  
59 review aims to explore the research focusing on Indigenous people living in developed countries i.e.  
60

1  
2  
3 Canada, the US, Australia, and New Zealand. Although the authors recognize the distinct cultural and  
4  
5 experiential differences between Indigenous peoples of these countries, they share common  
6  
7 historical experiences that impact their health. The authors intend to carry out interventions  
8  
9 focusing on these populations in Canada. Therefore, limiting the literature search to these four  
10  
11 countries will ensure that the results are relatable to the Canadian context.  
12  
13

### 14 **Methods**

15  
16 The scoping review methodology has proven to be very useful for investigating the extent of  
17  
18 the research in a given topic area. This type of synthesis review methodology was selected because  
19  
20 of its rigorous and methodical approach that allows for openly framed research questions. Further, it  
21  
22 was important that this review not be limited to only one evidence type (e.g., only randomized  
23  
24 controlled trials), as our preliminary search determined that the literature included a variety of  
25  
26 qualitative evidence sources.  
27  
28

29  
30 To ensure accurate and thorough reporting, the scoping review will be conducted following  
31  
32 the six-stage approach described by Arksey and O'Malley (54) and refined by Levac, Colquhoun, &  
33  
34 O'Brien (55): (1) Identifying the research question(s), (2) identifying relevant studies, (3) selecting the  
35  
36 studies, (4) charting the data, (5) collating, summarizing, and reporting the results, and (6) consulting  
37  
38 with experts. Further, the review will be reported using guidelines from the Preferred Reporting  
39  
40 Items for Systematic reviews and Meta-Analyses extension for Scoping Reviews (PRISMA-ScR).  
41  
42

43 **Ethics and dissemination:** Ethics review approval is not required for this project as the  
44  
45 project is aimed at providing evidence for the presence of substance use interventions for  
46  
47 Indigenous Elementary School children. Findings from this study will be presented to lay public, at  
48  
49 scientific conferences and published in a peer reviewed journal.  
50  
51

### 52 **Stage 1: Identifying the Research Questions**

53  
54 To start, the research team identified one broad research question: 1) what is known about  
55  
56 indigenous elementary school-based interventions for preventing substance use? We chose to focus  
57  
58 on this population because GM's research indicating that clients with addictions had been exposed  
59  
60



1  
2  
3 to substances at a very young age (22). The librarian (MK) ran a trial search to determine the  
4 feasibility of this research question. Following Arksey and O'Malley (54), our research question was  
5 refined as we became more familiar with the literature. Aiming to carefully examine and map the  
6 evidence on school-based interventions for preventing substance use in Indigenous children ages 7-  
7  
8  
9  
10  
11  
12 13, we developed the following research questions:

- 14 1. What is known about elementary Indigenous school-based interventions for preventing  
15 substance use?  
16
- 17 2. What are the characteristics and outcomes of elementary school-based interventions for  
18 preventing substance use?  
19  
20  
21  
22

### 23 **Stage 2: Identifying Relevant Studies**

24  
25 As scoping reviews allow for flexibility in evidence type, our review will not be limited to any  
26 specific qualitative or quantitative study design. To efficiently conduct searches in electronic  
27 databases, some parameters are needed to help guide the search strategy.  
28  
29  
30  
31

#### 32 **Eligibility Criteria**

33  
34 The following inclusion criteria were identified and used to guide the searches and review  
35 the articles: 1) Only English language articles published between 2009-2019 will be included. Limiting  
36 the project to the last 10 years is informed by the authors' belief that due to ever-changing and  
37 dynamic substance use and addiction landscape, interventions older than ten years might not be  
38 clinically relevant for informing interventions for elementary school children. 2) The population  
39 targeted in the studies that identify Indigenous children ages 7-13 living in North America (Canada or  
40 US), Australia, or New Zealand as one of the target population for intervention; 3) Studies that  
41 comment on mixed-age populations of Indigenous children and adolescents will be included for full-  
42 text analysis to further explore their suitability for inclusion; 4) Studies will be discussing or  
43 presenting the intervention or the results of interventions for school-based substance use  
44 prevention for this target population.  
45  
46  
47  
48  
49  
50  
51  
52  
53  
54  
55  
56  
57  
58

#### 59 **Exclusion Criteria**

1  
2  
3 The following exclusion criteria were identified: 1) Articles discussing interventions for addictions  
4 such as smoking, gambling, internet/social media/technology, 2) articles discussing adult population  
5 (ages 18+), and 3). Review articles and commentaries.  
6  
7  
8

### 9 **Database searches**

10  
11  
12 With input and in consultation with the research team, MK, an experienced health sciences  
13 librarian and familiar with evidence synthesis and reporting, established and tested the search  
14 strategy in MEDLINE identified relevant keywords. Controlled vocabulary was used to enhance  
15 sensitivity and specificity within the search. This preliminary search was developed and run to  
16 determine the feasibility of the scoping review and inform the searches in additional databases.  
17  
18  
19  
20  
21  
22

23  
24 The following electronic databases will be searched for published literature: MEDLINE in-process  
25 and other nonindexed citations (Ovid) – 1946 – Present; PubMed – 1966 – Present; EMBASE Classic  
26 (Ovid) – 1947 – Present; Cumulative Index of Nursing and Allied Health Literature (CINAHL) (EBSCO)  
27 – 1937 – Present; Educational Resources Information Center (ERIC) (Ovid) – 1965 – Present; Scopus  
28 (Elsevier) – 1970 – Present; and Cochrane Library (Wiley).  
29  
30  
31  
32  
33

34  
35 The results from each database search will be documented and saved, and references will be  
36 imported into EndNote, a bibliographic management software. Following the removal of duplicate  
37 references from EndNote, references will be imported into Rayyan, a review software (56) for title  
38 and abstract screening. Google Forms will be used to collect data during full-text analysis.  
39  
40  
41  
42

43  
44 To facilitate retrieval of relevant articles, the search was limited by language (English) and  
45 publication date (2009-2019). See Appendix A for full MEDLINE search strategies. In addition to  
46 searching electronic databases, the Canadian Agency for Drug and Technology in Health (CADTH)  
47 (57) tool will be used to search for relevant grey literature. The relevant areas to be searched from  
48 the CADTH (57) tool will include Health Technology Assessment (HTA) agencies (Canada, Australia,  
49 and USA), free and subscription-based databases, internet search engines, mental health, and  
50 nursing. Keywords identified throughout our search process will be utilized in the search process. We  
51  
52  
53  
54  
55  
56  
57  
58  
59  
60

1  
2  
3 will also check reference lists of included studies to identify any that had not been found in our other  
4  
5 searches.

### 6 7 **Stage 3: Study selection**

8  
9  
10 Rayyan will be used for the title/abstract screening process. The research team will identify  
11  
12 inclusion/exclusion keywords in correlation with identified inclusion and exclusion criteria. For  
13  
14 example, exclusion keywords for smoking, gambling, etc. as identified in exclusion criterion 1. Two  
15  
16 reviewers will independently review all articles. Should these 2 reviewers not reach a consensus, a  
17  
18 third reviewer will complete the title and abstract screening. This process will be repeated during the  
19  
20 full-text analysis; however, the mechanism for recording data and reviewing full-text articles will be  
21  
22 by EndNote. Google survey will be used to collect data (see below, "Charting the data").  
23  
24

### 25 26 **Stage 4: Charting the data**

27  
28 Review data extracted into a Google survey will include a) author(s), title, b) age groups of the target  
29  
30 population, c) Indigenous population identified, including the country of residence, d) summary of  
31  
32 intervention characteristics and e) intervention outcomes (Yes/No).  
33

### 34 35 **Stage 5: Collating, summarizing, and reporting the results**

36  
37 The purpose of a scoping review is to map and aggregate findings to present an overview of the  
38  
39 topic. Accordingly, we plan to a) map the results (main sources, locations, and quantity), b) provide  
40  
41 a descriptive summary and qualitative analysis, c) identify conceptual definitions, d) provide a  
42  
43 glossary of terms to clarify definitions found in the literature and e) report our results using the  
44  
45 PRISMA-ScR guidelines for scoping reviews to enhance transparency and reproducibility. Because  
46  
47 this is a scoping review, we will not appraise the quality of the studies or offer statistical analysis.  
48  
49 Information to be extracted and compiled into a table include; title of the articles, country of focus,  
50  
51 substance use intervention, intervention type, main findings, and lessons that can be learned.  
52  
53 Thematic analysis will be applied to identify common threads that will emerge from the data.  
54  
55  
56  
57  
58  
59  
60

## Stage 6: Consulting

We will present the preliminary findings of this scoping review to an advisory group comprised of an Indigenous elder, a knowledge keeper, elementary school leadership, and community members of one of the communities GM has a collaborative relationship with and one whose children are impacted by substance use. Community partners working with GM will help identify the appropriate advisory team members to join the committee. Presenting the findings to this committee will assist in the validation of the results with the community and provide a basis for reflection and feedback on the relevance of similar interventions in the community. Advisory committee feedback will inform the discussion, recommendations, and implication for the practice section of the manuscript.

## Patient and Public Involvement

This is a scoping review of literature aims to document evidence for the substance use prevention for Indigenous elementary school children and is partly informed by project that GM is involved that show early substance use for patients on opiate replacement therapy. Patients and public were not involved in the conceptualisation of the project, or the research question.

## Results

The searches, title, and abstract screening are now complete. In the coming months, two independent reviewers will conduct full-text analyses. During the process of full-text screening, we will also extract data from the marked studies. We expect the scoping review to be completed by late 2019/early 2020.

## Discussion

The decision to focus on Indigenous substance use prevention among elementary school children was informed by a project undertaken by GM, on characteristics and predictors of clinical experiences of clients on methadone project (22, 58). In this study, it became clear that the age of exposure to an addictive substance such as opiates, alcohol, and marijuana is between 6-11 years. Further, most of the clients on opiate replacement therapy struggle with treatment and recovery with more than 70% dropping out of ORT in the first year. Furthermore, considering that 95% of the

1  
2  
3 clients on this study self-identified as Indigenous, who contend with diverse social determinants of  
4 health that are a major barrier to the recovery from addiction, we believe that that emphasis should  
5 be placed on understanding the substance use prevention intervention for elementary school  
6 children, who are at a risk of substance use.  
7  
8  
9  
10

11  
12 To start the process, we assembled a team of scholars with experiences working with  
13 Indigenous and marginalized communities. Consultations with the Health Science librarian helped  
14 her identify key phrases and words that represented the broader focus of Indigenous Elementary  
15 Substance use prevention.  
16  
17  
18  
19

20  
21 Understanding interventions to prevent substance use among Indigenous youth aged 7-13 is  
22 vital to addressing substance use and addictions in the Indigenous population. Of interest, we will  
23 seek to identify the philosophical and theoretical underpinnings that characterize these  
24 interventions and the extent to which Indigenous knowledge is incorporated in these projects. The  
25 problem of substance use and addictions cannot be overstated: findings of numerous studies show  
26 that suggests that early exposure to substance use leads to life-long poly-substance use, which not  
27 only causes complex comorbid conditions that are difficult and expensive to treat but also severely  
28 impacts the quality of life of these individuals and their families (59-61). We, therefore, argue that  
29 prevention is the best intervention for Indigenous communities struggling with substance use  
30 challenges, considering they also contend with other social determinants of health.  
31  
32  
33  
34  
35  
36  
37  
38  
39  
40  
41  
42

43 The proposed scoping review has the potential to influence future policy, programs, and  
44 services supporting the health and well being of Indigenous youth in Canada and beyond. It will  
45 describe the nature and value of early strategies to prevent substance use in this group, and it will  
46 provide exemplars of interventions that can be implemented in a Canadian, Australian, New Zealand,  
47 and US settings.  
48  
49  
50  
51  
52  
53  
54  
55  
56  
57  
58  
59  
60

## Reference

1. Gracey, M., & King M. Indigenous health part 1: Determinants and disease patterns. *Lancet*. 2009;374:65 – 75.
2. Reid, J., Taylor-Moore, K., & Varona G. Towards a social-structural model for understanding current disparities in Maori health and well-being. *J Loss Trauma*. 2014;19(6):514–36.
3. Zambas, S. I., & Wright J. Impact of colonialism on Māori and Indigenous healthcare access: a discussion paper. *Contemp Nurse*. 2016;52(4):398–409.
4. Bombay A, Matheson K, Anisman H. The intergenerational effects of Indian Residential Schools: Implications for the concept of historical trauma. *Transcult Psychiatry* [Internet]. 2014 Jun 24;51(3):320–38. Available from: <http://journals.sagepub.com/doi/10.1177/1363461513503380>
5. Hirini PR, Collings SC. Whakamomori, He Whakaaro, He Kōrero Noa. Ministry of Health; 2005.
6. Rege S. State of indigenous mental health in Australia-a colonial legacy? *International Psychiatry*. 2009 Oct;6(4):98-100.
7. Wirihana R, Smith C. Historical trauma, healing and well-being in Māori communities. *HE RAU MURIMURI AROHA*. 2019:2.
8. Kirmayer LJ, Brass GM, Tait CL. The mental health of Aboriginal peoples: Transformations of identity and community. *The Canadian Journal of Psychiatry*. 2000 Sep;45(7):607-16.
9. Marsh TN, Coholic D, Cote-Meek S, Najavits LM. Blending Aboriginal and Western healing methods to treat intergenerational trauma with substance use disorder in Aboriginal peoples who live in Northeastern Ontario, Canada. *Harm Reduct J* [Internet]. 2015 Dec 20;12(1):14. Available from: <http://www.harmreductionjournal.com/content/12/1/14>
10. Gagne, MA. The role of dependency and colonialism in generation trauma in First Nations citizens: The James Bay Cree. In: Y D, editor. *Intergenerational handbook of*

- 1  
2  
3 multigenerational legacies of trauma. New York: Plenum Press; 1998. p. 355–71.  
4  
5  
6 11. Ross A, Dion J, Cantinotti M, Collin-Vézina D, Paquette L. Impact of residential schooling  
7 and of child abuse on substance use problem in Indigenous Peoples. *Addict Behav*  
8 [Internet]. 2015 Dec;51:184–92. Available from:  
9  
10 <https://linkinghub.elsevier.com/retrieve/pii/S0306460315002701>  
11  
12  
13  
14 12. Nelson, S. (2013). Challenging hidden assumptions: colonial norms as determinants of  
15 Aboriginal mental health. National Collaborating Centre for Aboriginal Health.  
16  
17  
18 13. Mikkonen, J., & Raphael, D. (2010). *Social Determinants of Health: The Canadian Facts*.  
19 Toronto: York University School of Health Policy and Management.  
20  
21  
22 [//www.thecanadianfacts.org/](http://www.thecanadianfacts.org/)  
23  
24  
25 14. Reading, C., & Wien, F. (2013). Health inequalities and social determinants of health of  
26 aboriginal people. National Collaborating centre for Aboriginal Health. Prince George BC.  
27  
28  
29 15. Gracey, M., & King, M. (2009). Indigenous health part 1: determinants and disease  
30 patterns. *The Lancet*, 374(9683), 65-75.  
31  
32  
33 16. Kolahdooz, F., Nader, F., Yi, K. J., & Sharma, S. (2015). Understanding the social  
34 determinants of health among Indigenous Canadians: priorities for health promotion  
35 policies and actions. *Global health action*, 8, 27968. doi:10.3402/gha.v8.27968  
36  
37  
38 17. King, M., Smith, A., & Gracey, M. (2009). Indigenous health part 2: the underlying causes of  
39 the health gap. *The lancet*, 374(9683), 76-85  
40  
41  
42 18. First Peoples Worldwide. (n.d). The challenges we face. Accessed at  
43 <http://www.firstpeoples.org/the-challenges-we-face.htm>  
44  
45  
46 19. National collaborating Centre for Aboriginal health ( n.d.). Setting the context: An overview  
47 of Aboriginal Health in Canada. Accessed at [https://www.ccnsa-nccah.ca/docs/context/FS-](https://www.ccnsa-nccah.ca/docs/context/FS-OverviewAboriginalHealth-EN.pdf)  
48 [OverviewAboriginalHealth-EN.pdf](https://www.ccnsa-nccah.ca/docs/context/FS-OverviewAboriginalHealth-EN.pdf)  
49  
50  
51  
52 20. Urbanoski KA. Need for equity in treatment of substance use among Indigenous people in  
53 Canada. *Can Med Assoc J* [Internet]. 2017 Nov 6;189(44):E1350–1. Available from:  
54  
55  
56  
57  
58  
59  
60

- 1  
2  
3 <http://www.cmaj.ca/lookup/doi/10.1503/cmaj.171002>  
4  
5  
6 21. Population Health Branch M of H. HIV Prevention and Control Program Report for 2015.  
7  
8 2016.  
9  
10 22. Maina G, Crizzle A, Maposa S, Fournier B. Sociodemographic Profiles and Clinical Outcomes  
11  
12 for Clients on Methadone Maintenance Treatment in a Western Canadian Clinic. *J Forensic*  
13  
14 *Nurs* [Internet]. 2019 Jul;1. Available from:  
15  
16 <http://insights.ovid.com/crossref?an=01263942-900000000-00001>  
17  
18 23. Centre FNIG. First Nations Regional Health Survey (RHS) 2008/10: National report on adults,  
19  
20 youth and children living in First Nations communities. Ottawa; 2012.  
21  
22 24. Russell, C., Firestone, M., Kelly, L., Mushquash, C., Fischer B. Prescription opioid prescribing,  
23  
24 use/misuse, harms and treatment among Indigenous people in Canada: a narrative review  
25  
26 of available data and indicators. *Rural Remote Heal*. 2016;16(14):3974.  
27  
28 25. Kanate D, Folk D, Cirone S, Gordon J, Kirlaw M, Veale T, Bocking N, Rea S KL. Community-  
29  
30 wide measures of wellness in a remote First Nations community experiencing opioid  
31  
32 dependence: evaluating outpatient buprenorphine-naloxone substitution therapy in the  
33  
34 context of a First Nations healing program. *Can Fam Physician*. 2016;61(2):160–5.  
35  
36 26. Herring, S., Spangaro, J., Lauw, M., & McNamara L (2013). The intersection of trauma, racism,  
37  
38 and cultural competence in effective work with Indigenous people: Waiting for trust. *Aust*  
39  
40 *Soc Work*. 2013;66(1):104–17.  
41  
42 27. Czyzewski, K. (2011). Colonialism as a Broader Social Determinant of Health. *The*  
43  
44 *International Indigenous Policy Journal*, 2(1) . Retrieved from:  
45  
46 <https://ir.lib.uwo.ca/iipj/vol2/iss1/5>. DOI: 10.18584/iipj.2011.2.1.5  
47  
48 28. Canada S. Suicide among First Nations people, Metis and Inuit (2011-2016): Findings from  
49  
50 the 2011 Canadian Census Health and Environment Cohort (CanCHEC). [Internet]. 2019.  
51  
52 Available from: <https://www150.statcan.gc.ca/n1/pub/99-011-x/99-011-x2019001->  
53  
54 [eng.htm](https://www150.statcan.gc.ca/n1/pub/99-011-x/99-011-x2019001-eng.htm)  
55  
56  
57  
58  
59  
60



- 1  
2  
3 29. Centre for Disease Prevention ( CDC). Suicide Risks and Protective Factors. [Internet]. 2018.  
4  
5 Available from:  
6  
7 <https://www.cdc.gov/violenceprevention/suicide/riskprotectivefactors.html>  
8  
9
- 10 30. Kirmayer, L. J., Boothroyd, L. J., & Hodgins, S. (1998). Attempted suicide among Inuit youth:  
11  
12 psychosocial correlates and implications for prevention. *Canadian Journal of Psychiatry*,  
13  
14 43(8), 816–822  
15
- 16 31. Jetty R. Tobacco use and misuse among Indigenous children and youth in Canada. *Paediatr*  
17  
18 *Child Health*. 2017. 22(7):395–9.  
19
- 20 32. Statistics Canada. Indigenous Peoples: Fact Sheet for Canada [Internet]. 2015. Available  
21  
22 from: <https://www150.statcan.gc.ca/n1/pub/89-656-x/89-656-x2015001-eng.htm>  
23  
24
- 25 33. Moss HB, Chen CM, Yi H. Early adolescent patterns of alcohol, cigarettes, and marijuana  
26  
27 polysubstance use and young adult substance use outcomes in a nationally representative  
28  
29 sample. *Drug Alcohol Depend* [Internet]. 2014 Mar;136:51–62. Available from:  
30  
31 <https://linkinghub.elsevier.com/retrieve/pii/S0376871613005279>  
32  
33
- 34 34. U.S. Department of Health and Human Services (HHS) SA and M, (SAMHSA) HSA. No Title  
35  
36 [Internet]. 2017. Available from:  
37  
38 [https://alcoholpolicy.niaaa.nih.gov/sites/default/files/imce/users/u1743/stop\\_act\\_rtc\\_201](https://alcoholpolicy.niaaa.nih.gov/sites/default/files/imce/users/u1743/stop_act_rtc_2017.pdf)  
39  
40  
41 7.pdf  
42
- 43 35. Swahn MH, Bossarte RM, Ashby JS, Meyers J. Pre-teen alcohol use initiation and suicide  
44  
45 attempts among middle and high school students: Findings from the 2006 Georgia Student  
46  
47 Health Survey. *Addict Behav* [Internet]. 2010 May;35(5):452–8. Available from:  
48  
49 <https://linkinghub.elsevier.com/retrieve/pii/S030646030900344X>  
50  
51
- 52 36. King KM, Chassin L. A Prospective Study of the Effects of Age of Initiation of Alcohol and  
53  
54 Drug Use on Young Adult Substance Dependence\*. *J Stud Alcohol Drugs* [Internet]. 2007  
55  
56 Mar;68(2):256–65. Available from: <http://www.jsad.com/doi/10.15288/jsad.2007.68.256>  
57  
58
- 59 37. Kirisci L, Tarter R, Ridenour T, Zhai ZW, Fishbein D, Reynolds M, et al. Age of alcohol and  
60

- 1  
2  
3 cannabis use onset mediates the association of transmissible risk in childhood and  
4  
5 development of alcohol and cannabis disorders: Evidence for common liability. *Exp Clin*  
6  
7 *Psychopharmacol* [Internet]. 2013;21(1):38–45. Available from:  
8  
9 <http://doi.apa.org/getdoi.cfm?doi=10.1037/a0030742>  
10  
11
- 12 38. Hicks JA, Friedman RS, Gable PA, Davis WE. Interactive effects of approach motivational  
13  
14 intensity and alcohol cues on the scope of perceptual attention. *Addiction* [Internet]. 2012  
15  
16 Jun;107(6):1074–80. Available from: [http://doi.wiley.com/10.1111/j.1360-](http://doi.wiley.com/10.1111/j.1360-0443.2012.03781.x)  
17  
18 [0443.2012.03781.x](http://doi.wiley.com/10.1111/j.1360-0443.2012.03781.x)  
19  
20
- 21 39. Kennett J, Vincent NA, Snoek A. Drug Addiction and Criminal Responsibility. In: *Handbook*  
22  
23 *of Neuroethics* [Internet]. Dordrecht: Springer Netherlands; 2015. p. 1065–83. Available  
24  
25 from: [http://link.springer.com/10.1007/978-94-007-4707-4\\_71](http://link.springer.com/10.1007/978-94-007-4707-4_71)  
26  
27
- 28 40. Degenhardt L, Randall D, Hall W, Law M, Butler T, Burns L. Mortality among clients of a  
29  
30 state-wide opioid pharmacotherapy program over 20 years: Risk factors and lives saved.  
31  
32 *Drug Alcohol Depend* [Internet]. 2009 Nov;105(1–2):9–15. Available from:  
33  
34 <https://linkinghub.elsevier.com/retrieve/pii/S0376871609002300>  
35  
36
- 37 41. Sartor CE, Waldron M, Duncan AE, Grant JD, McCutcheon V V., Nelson EC, et al. Childhood  
38  
39 sexual abuse and early substance use in adolescent girls: the role of familial influences.  
40  
41 *Addiction* [Internet]. 2013 May;108(5):993–1000. Available from:  
42  
43 <http://doi.wiley.com/10.1111/add.12115>  
44  
45
- 46 42. Chen CY, Storr CL, Anthony JC. Early-onset drug use and risk for drug dependence  
47  
48 problems. *Addictive behaviors*. 2009 Mar 1;34(3):319-22.  
49
- 50 43. Bachman, J. G., O'Malley, P. M., Schulenberg, J. E., Johnston, L. D., Bryant, A. L., & Merline  
51  
52 AC. *The decline of substance use in young adulthood: Changes in social activities, roles, and*  
53  
54 *beliefs*. Mahwah, NJ, US: Lawrence Erlbaum Associates Publishers.; 2002.  
55  
56
- 57 44. Hammond, C. J., Mayes, L. C., & Potenza MN. *Neurobiology of adolescent substance use*  
58  
59 *and addictive behaviors: prevention and treatment implications*. *Adolescent medicine*.  
60

- 1  
2  
3 State Arts Rev. 2014;25(1):15.  
4  
5  
6 45. Lee C-YS, Winters KC, Wall MM. Trajectories of Substance Use Disorders in Youth:  
7 Identifying and Predicting Group Memberships. *J Child Adolesc Subst Abuse* [Internet].  
8 2010 Mar 26;19(2):135–57. Available from:  
9  
10 <http://www.tandfonline.com/doi/abs/10.1080/10678281003634975>  
11  
12  
13  
14 46. Jordan CJ, Andersen SL. Sensitive periods of substance abuse: Early risk for the transition to  
15 dependence. *Dev Cogn Neurosci* [Internet]. 2017 Jun;25:29–44. Available from:  
16  
17 <https://linkinghub.elsevier.com/retrieve/pii/S1878929316301931>  
18  
19  
20  
21 47. Miller, T.R. and HD. How should governments spend the drug prevention dollar: A buyer's  
22 guide. In: Stockwell, T., Gruenewald, P., Toumbourou, J., and Loxley W, editor. *Preventing*  
23 *harmful substance use: The evidence base for policy and practice*. England: John Wiley &  
24 *Sons.*; 2005. p. 415–31.  
25  
26  
27  
28  
29  
30 48. Faggiano F, Vigna-Taglianti F, Burkhart G, Bohrn K, Cuomo L, Gregori D, et al. The  
31 effectiveness of a school-based substance abuse prevention program: 18-Month follow-up  
32 of the EU-Dap cluster randomized controlled trial. *Drug Alcohol Depend* [Internet]. 2010  
33 Apr;108(1–2):56–64. Available from:  
34  
35 <https://linkinghub.elsevier.com/retrieve/pii/S0376871609004384>  
36  
37  
38  
39  
40  
41 49. Caria MP, Faggiano F, Bellocco R, Galanti MR. Effects of a School-Based Prevention Program  
42 on European Adolescents' Patterns of Alcohol Use. *J Adolesc Heal* [Internet]. 2011  
43 Feb;48(2):182–8. Available from:  
44  
45 <https://linkinghub.elsevier.com/retrieve/pii/S1054139X10002673>  
46  
47  
48  
49  
50 50. Griffin KW, Bang H, Botvin GJ. Age of alcohol and marijuana use onset predicts weekly  
51 substance use and related psychosocial problems during young adulthood. *J Subst Use*  
52 [Internet]. 2010 Jun 10;15(3):174–83. Available from:  
53  
54 <http://www.tandfonline.com/doi/full/10.3109/14659890903013109>  
55  
56  
57  
58  
59 51. Salvo, N., Bennett, J., Cheung, A., Chen, Y., Rice, M., Rush, B., Bullock, H., Bowlby A.  
60

- 1  
2  
3 Prevention of Of, substance use in children/adolescents with mental disorders: Can Acad  
4 Child Adolesc Psychiatry. 2012;21(4):245–52.  
5  
6  
7  
8 52. Logan-Greene P, Semanchin Jones A. Predicting chronic neglect: Understanding risk and  
9 protective factors for CPS-involved families. Child Fam Soc Work [Internet]. 2018  
10 May;23(2):264–72. Available from: <http://doi.wiley.com/10.1111/cfs.12414>  
11  
12  
13  
14 53. Goldberg JM, Sklad M, Elfrink TR, Schreurs KMG, Bohlmeijer ET, Clarke AM. Effectiveness of  
15 interventions adopting a whole school approach to enhancing social and emotional  
16 development: a meta-analysis. Eur J Psychol Educ [Internet]. 2019 Oct 30;34(4):755–82.  
17 Available from: <http://link.springer.com/10.1007/s10212-018-0406-9>  
18  
19  
20  
21  
22  
23 54. Arksey H, O'Malley L. Scoping studies: towards a methodological framework. Int J Soc Res  
24 Methodol [Internet]. 2005 Feb;8(1):19–32. Available from:  
25  
26 <http://www.tandfonline.com/doi/abs/10.1080/1364557032000119616>  
27  
28  
29  
30 55. Levac D, Colquhoun H, O'Brien KK. Scoping studies: advancing the methodology. Implement  
31 Sci [Internet]. 2010 Dec 20;5(1):69. Available from:  
32  
33 <http://implementationscience.biomedcentral.com/articles/10.1186/1748-5908-5-69>  
34  
35  
36  
37 56. Ouzzani M, Hammady H, Fedorowicz Z, Elmagarmid A. Rayyan—a web and mobile app for  
38 systematic reviews. Syst Rev [Internet]. 2016 Dec 5;5(1):210. Available from:  
39  
40 <http://systematicreviewsjournal.biomedcentral.com/articles/10.1186/s13643-016-0384-4>  
41  
42  
43 57. CADTH. Grey matters: a practical tool for searching health-related grey literature (internet).  
44 Ottawa, <https://www.cadth.ca/resources/finding-evidence> (2018, accessed 14 November  
45 2019).  
46  
47  
48  
49  
50 58. Maina G, Tahir H, Docabo A, Kahia N, Brunelle C. Exploring health-care providers'  
51 experiences in the care of clients on opioid agonist treatment in two western Canadian  
52 clinics. Canadian Journal of Nursing Research. 2019 Apr 16:0844562119842751.  
53  
54  
55  
56  
57 59. Charles, N. E., Mathias, C. W., Acheson, A., & Dougherty, D. M. (2017). Preadolescent  
58 sensation seeking and early adolescent stress relate to at-risk adolescents' substance use  
59  
60

- 1  
2  
3 by age 15. Addictive behaviors, 69, 1-7.  
4  
5 60. De Genna, N. M., Larkby, C., & Cornelius, M. D. (2007). Early and adverse experiences with  
6 sex and alcohol are associated with adolescent drinking before and during pregnancy.  
7 Addictive behaviors, 32(12), 2799-2810.  
8  
9  
10  
11 61. Odgers, C. L., Caspi, A., Nagin, D. S., Piquero, A. R., Slutske, W. S., Milne, B. J., ... & Moffitt,  
12 T. E. (2008). Is it important to prevent early exposure to drugs and alcohol among  
13 adolescents?. Psychological Science, 19(10), 1037-1044.  
14  
15  
16  
17  
18  
19  
20  
21  
22  
23  
24  
25  
26  
27  
28  
29  
30  
31  
32  
33  
34  
35  
36  
37  
38  
39  
40  
41  
42  
43  
44  
45  
46  
47  
48  
49  
50  
51  
52  
53  
54  
55  
56  
57  
58  
59  
60

For review only

### Contributions:

- Dr. Geoffrey Maina was involved in the conceptualisation and writing of the protocol.
- Taryn Phaneuf was involved in the literature search, writing the introductory section, and proofreading the protocol.
- Maeve Mclean was involved in the literature search, writing the introductory section, and proofreading the protocol.
- Megan Kennedy was involved in designing the search strategy and writing the methods section.
- Dr. Ann Gakumo was involved in editing and proofreading the manuscript.
- Dr. Joseph Nguemo was involved in editing and proofreading the manuscript.
- Dr. Alexandra King was involved in editing and proofreading the manuscript.
- Solomon Kasha Mcharo was involved in the revision and formatting of the manuscript.

### Funding

This work was supported by the Faculty Recruitment and Retention Fund, University of Saskatchewan fund no. 419054.

**Conflicts of interests':** The authors have no conflicts of interest to declare.

Word count: 3255

## Appendix A

## Search Strategy – MEDLINE

The following search was run in Ovid MEDLINE on April 22, 2019:

|    |                                                                                                                                                                                                                        |  |
|----|------------------------------------------------------------------------------------------------------------------------------------------------------------------------------------------------------------------------|--|
| 1  | alaska natives/ or indians, central american/ or indians, north american/ or indians,<br>south american/ or inuits/                                                                                                    |  |
| 2  | Oceanic Ancestry Group/                                                                                                                                                                                                |  |
| 3  | (indigenous or Indigenous* or "first nation" or "first nations" or metis or native or<br>natives or "first people" or "first peoples" or "on reserve" or "off reserve" or inuit* or<br>eskimo* or maori*).ab,ti,kw,kf. |  |
| 4  | Health Services, Indigenous/                                                                                                                                                                                           |  |
| 5  | or/1-4                                                                                                                                                                                                                 |  |
| 6  | Child/                                                                                                                                                                                                                 |  |
| 7  | (children? or child? or young or youth? or juvenile? or kid or kids or underage* or<br>preteen* or preadolescen*).ab,ti,kw.                                                                                            |  |
| 8  | ((school or under) adj1 age*) or (pre adj1 (teen* or adolescen*))).ab,ti,kf                                                                                                                                            |  |
| 9  | ((elementary or primary or middle or grade or grammar or junior or secondary) adj1<br>school*).ab,ti,kf.                                                                                                               |  |
| 10 | "junior high".ab,ti,tw.                                                                                                                                                                                                |  |
| 11 | Schools/                                                                                                                                                                                                               |  |
| 12 | or/6-11                                                                                                                                                                                                                |  |
| 13 | 5 and 12                                                                                                                                                                                                               |  |
| 14 | exp Substance-Related Disorders/ed, pc, px [Education, Prevention & Control,<br>Psychology]                                                                                                                            |  |
| 15 | exp Alcohol-Related Disorders/pc, px [Prevention & Control, Psychology]                                                                                                                                                |  |
| 16 | exp Opioid-Related Disorders/pc, px [Prevention & Control, Psychology]                                                                                                                                                 |  |

|    |                                                                                                                                                                                                                               |  |
|----|-------------------------------------------------------------------------------------------------------------------------------------------------------------------------------------------------------------------------------|--|
| 17 | exp Prescription Drug Misuse/pc, px [Prevention & Control, Psychology]                                                                                                                                                        |  |
| 18 | or/ 14-17                                                                                                                                                                                                                     |  |
| 19 | Underage Drinking/                                                                                                                                                                                                            |  |
| 20 | Drug-Seeking Behavior/                                                                                                                                                                                                        |  |
| 21 | exp "Marijuana Use"/                                                                                                                                                                                                          |  |
| 22 | ((legal* or illegal* or prescription or illicit or street or club) adj1 (drug? or medication?)).ab,ti,kf.                                                                                                                     |  |
| 23 | ((binge or underage or "under age" or teen or adolescent?) adj1 (drink* or alcohol)).ab,ti,kf.                                                                                                                                |  |
| 24 | controlled substances/ or medical marijuana/ or prescription drugs/ or exp street drugs/ or exp synthetic drugs/                                                                                                              |  |
| 25 | exp "hypnotics and sedatives"/ or exp narcotics/ or exp analgesics, opioid/ or exp hallucinogens/ or performance-enhancing substances/                                                                                        |  |
| 26 | opium/ or (heroin or opium or smack or dope or horse or "china white").ab,ti,tw                                                                                                                                               |  |
| 27 | exp cannabinoids/ or cannabis/ or (marijuana or weed or pot or hash or hashish or ganja or blunt? or joint? or "mary jane" or reefer or CBD or cannbin* or cannabis).ab,ti,tw                                                 |  |
| 28 | Central Nervous System Stimulants/ or (cocaine or coke or "crack cocaine" or amphetamine? or methamphetamine? or meth or crank or speed or upper? or "club drug" or "club drugs" or MDMA or ecstasy or molly or GHB).ab,ti,tw |  |
| 29 | ketamine/ or phencyclidine/ or exp salvia/ or dextromethorphan/ or ("dissociative drugs" or "dissociative drug" or "special k" or PCP or "angel dust" or robotripping).ab,ti,tw.                                              |  |



|    |                                                                                                                                                                               |  |
|----|-------------------------------------------------------------------------------------------------------------------------------------------------------------------------------|--|
| 30 | mescaline/ or psilocybin/ or exp testosterone congeners/ or (hallucinogen* or LSD or acid or peyote or "magic mushrooms" or shrooms or "anabolic steroids" or roids).ab,ti,tw |  |
| 31 | nitrous oxide/ or (inhalant? or "laughing gas" or popper? or snapper? or whippets or huffing).ab,ti,tw                                                                        |  |
| 32 | Or/ 19-31                                                                                                                                                                     |  |
| 33 | (abus* or misus* or "inappropriate use").ab,ti,tw                                                                                                                             |  |
| 34 | (prevent* or intervention or intervene or program? or programme? or activit* or support* or initiative?).ab,ti,tw.                                                            |  |
| 35 | school health services/ or health education/ or health promotion/                                                                                                             |  |
| 36 | 34 or 35                                                                                                                                                                      |  |
| 37 | 32 and 33 and 36                                                                                                                                                              |  |
| 38 | 18 or 37                                                                                                                                                                      |  |
| 39 | 13 and 38                                                                                                                                                                     |  |
| 40 | limit 39 to (english language and yr="2009 -Current")                                                                                                                         |  |

# BMJ Open

## School-based interventions for preventing substance use in Indigenous children ages 7-13: A scoping review protocol

|                                 |                                                                                                                                                                                                                                                                                                                                                                                                                                                                                                                                                                                                                  |
|---------------------------------|------------------------------------------------------------------------------------------------------------------------------------------------------------------------------------------------------------------------------------------------------------------------------------------------------------------------------------------------------------------------------------------------------------------------------------------------------------------------------------------------------------------------------------------------------------------------------------------------------------------|
| Journal:                        | <i>BMJ Open</i>                                                                                                                                                                                                                                                                                                                                                                                                                                                                                                                                                                                                  |
| Manuscript ID                   | bmjopen-2019-034032.R2                                                                                                                                                                                                                                                                                                                                                                                                                                                                                                                                                                                           |
| Article Type:                   | Protocol                                                                                                                                                                                                                                                                                                                                                                                                                                                                                                                                                                                                         |
| Date Submitted by the Author:   | 20-Dec-2019                                                                                                                                                                                                                                                                                                                                                                                                                                                                                                                                                                                                      |
| Complete List of Authors:       | Maina , Geoffrey; University of Saskatchewan, College of Nursing<br>Phaneuf, Taryn; University of Saskatchewan College of Nursing<br>Kennedy, Megan ; University of Saskatchewan Health Sciences Library<br>Mclean, Maeve ; University of Saskatchewan College of Graduate Studies and Research, Public Health<br>Gakumo, Ann ; University of Massachusetts Boston, Nursing<br>Nguemo, Joseph; Ryerson University, Daphne Cockwell School of Nursing;<br>King , Alexandra ; University of Saskatchewan College of Medicine, Medicine<br>Mcharo, Solomon ; University of Saskatchewan College of Nursing, Nursing |
| <b>Primary Subject Heading</b>: | Addiction                                                                                                                                                                                                                                                                                                                                                                                                                                                                                                                                                                                                        |
| Secondary Subject Heading:      | Addiction, Public health                                                                                                                                                                                                                                                                                                                                                                                                                                                                                                                                                                                         |
| Keywords:                       | alcohol, substance use, addiction, elementary schools, prevention                                                                                                                                                                                                                                                                                                                                                                                                                                                                                                                                                |
|                                 |                                                                                                                                                                                                                                                                                                                                                                                                                                                                                                                                                                                                                  |

SCHOLARONE™  
Manuscripts



I, the Submitting Author has the right to grant and does grant on behalf of all authors of the Work (as defined in the below author licence), an exclusive licence and/or a non-exclusive licence for contributions from authors who are: i) UK Crown employees; ii) where BMJ has agreed a CC-BY licence shall apply, and/or iii) in accordance with the terms applicable for US Federal Government officers or employees acting as part of their official duties; on a worldwide, perpetual, irrevocable, royalty-free basis to BMJ Publishing Group Ltd ("BMJ") its licensees and where the relevant Journal is co-owned by BMJ to the co-owners of the Journal, to publish the Work in this journal and any other BMJ products and to exploit all rights, as set out in our [licence](#).

The Submitting Author accepts and understands that any supply made under these terms is made by BMJ to the Submitting Author unless you are acting as an employee on behalf of your employer or a postgraduate student of an affiliated institution which is paying any applicable article publishing charge ("APC") for Open Access articles. Where the Submitting Author wishes to make the Work available on an Open Access basis (and intends to pay the relevant APC), the terms of reuse of such Open Access shall be governed by a Creative Commons licence – details of these licences and which [Creative Commons](#) licence will apply to this Work are set out in our licence referred to above.

Other than as permitted in any relevant BMJ Author's Self Archiving Policies, I confirm this Work has not been accepted for publication elsewhere, is not being considered for publication elsewhere and does not duplicate material already published. I confirm all authors consent to publication of this Work and authorise the granting of this licence.

1  
2  
3 **School-based interventions for preventing substance use in Indigenous children ages 7-13: A**  
4  
5 **scoping review protocol**  
6  
7

8 **Authors:**  
9

- 10 1. \*Dr. Geoffrey Maina, Assistant Professor, College of Nursing, University of Saskatchewan.  
11  
12 210-1301 Central Avenue, Prince Albert, S5V 4W1 SK.  
13  
14 Tel: 306-765-3887; email: [geoffrey.maina@usask.ca](mailto:geoffrey.maina@usask.ca)  
15  
16 2. Taryn Phaneuf, Undergraduate Nursing student, College of Nursing, University of  
17  
18 Saskatchewan. Email: [tlp044@mail.usask.ca](mailto:tlp044@mail.usask.ca)  
19  
20 3. Megan Kennedy, Former Librarian, Leslie & Irene Dubé Health Sciences Library, University of  
21  
22 Saskatchewan. Email: [megan.kennedy@usask.ca](mailto:megan.kennedy@usask.ca).  
23  
24 4. Maeve Mclean, Graduate student, Master of Public Health, University of Saskatchewan,  
25  
26 Saskatoon Campus. [Maeve.mclean@usask.ca](mailto:Maeve.mclean@usask.ca)  
27  
28 5. Dr. Ann Gakumo, Associate Professor of Nursing, and Department Chair of Nursing,  
29  
30 University of Massachusetts, Boston. Email: [ann.gakumo@umb.edu](mailto:ann.gakumo@umb.edu)  
31  
32 6. Dr. Joseph D. Nguemo Djimetio, weSpeak Postdoc fellow, Daphne Cockwell School of  
33  
34 Nursing, Faculty of Community Services, Ryerson University. Email:  
35  
36 [jnguemodjimetio@ryerson.ca](mailto:jnguemodjimetio@ryerson.ca)  
37  
38 7. Dr. Alexandra King, Cameco Chair in Indigenous Health, University of Saskatchewan. Email:  
39  
40 [alexandra.king@usask.ca](mailto:alexandra.king@usask.ca)  
41  
42 8. Solomon Kasha Mcharo, PhD(c). College of Nursing, University of Saskatchewan. Saskatoon  
43  
44 Campus. Email: [kasha.mcharo@usask.ca](mailto:kasha.mcharo@usask.ca)  
45  
46  
47  
48  
49  
50  
51

52 \* Corresponding author: Dr. Geoffrey Maina  
53  
54  
55  
56  
57  
58  
59  
60

## Abstract

**Introduction:** Throughout the world, Indigenous peoples share traumatic colonial experiences that have caused gross inequalities for them and continue to impact every aspect of their lives. The effect of intergenerational trauma and other health disparities have been remarkable for Indigenous children and adolescents, who are at a greater risk of adverse mental health and addiction outcomes compared to non-Indigenous people of the same age. Most Indigenous children are exposed to addictive substances at an early age which often leads to early initiation of substance use and is associated with subsequent physical and mental health issues, poor social and relational functioning, and occupational and legal problems. The aim of this paper is to report the protocol for the scoping review of school-based interventions for substance use prevention in Indigenous children ages 7-13 living in Canada, the US, Australia, and New Zealand. This scoping review seeks to answer the following questions: 1) What is known about Indigenous school-based interventions for preventing substance use 2) What are the characteristics and outcomes of school-based interventions for preventing substance use?

**Methods and analysis:** This scoping review will use steps described by Arksey and O'Malley (2005) & Levac, Colquhoun, & O'Brien (2010): (1) identifying the research question(s); (2) identifying relevant studies; (3) selecting the studies; (4) charting the data; (5) collating, summarizing and reporting the results; and (6) consulting with experts. Our findings will be reported according to the guidelines set by the Preferred Reporting Items for Systematic Reviews and Meta-Analyses extension for Scoping Reviews (PRISMA-ScR).

**Ethics and dissemination:** Ethics review approval is not required for this project. Findings from this study will be presented to lay public, at scientific conferences and published in a peer-reviewed journal.

## Article summary

### Strengths and limitations of this study

- This scoping review will lead to a better understanding of the nature, characteristics, and outcomes of interventions for Indigenous pre-teen alcohol and substance use prevention.
- This study is limited to literature published in English between January 2009 and December 2019.
- Since the scoping review aims to assess the research activity on a topic and not the quality of the research thereof, this project will provide an overview of all the intervention focussing on elementary school-based Indigenous substance use prevention.
- This study is also limited to research in Canada, the US, Australia, and New Zealand, and the findings will only be relevant to these countries.

Keywords: alcohol; substance use; addiction; prevention; elementary school; Indigenous

review only

## Background

1  
2  
3  
4  
5  
6  
7  
8  
9  
10  
11  
12  
13  
14  
15  
16  
17  
18  
19  
20  
21  
22  
23  
24  
25  
26  
27  
28  
29  
30  
31  
32  
33  
34  
35  
36  
37  
38  
39  
40  
41  
42  
43  
44  
45  
46  
47  
48  
49  
50  
51  
52  
53  
54  
55  
56  
57  
58  
59  
60

Indigenous peoples worldwide share traumatic colonial experiences that continue to impact every aspect of their lives (1, 2). These historical socio-political processes have been attributed to causing gross inequalities for this population(3). Colonization, the imposition of colonial institutions and rules, and subsequent disruption of the Aboriginal way of life continue to have significant negative impacts on the lives and health of indigenous people. In Canada, residential school experiences of physical, sexual, and emotional violence, along with other legacies of colonization, have had dramatic and far-reaching impacts that continue to cause negative health consequences for Indigenous people (4). The resultant intergenerational trauma, which gets institutionalized within the family and the community, is associated with increased risks of mental health problems and addictions (5-11)

Colonization is now regarded as a determinant of health, as it impacts many aspects of Indigenous peoples' wellbeing (12). Moreover, in Canada, Aboriginal status is regarded as a determinant of health due to the numerous determinants of health they contend with, which are potentiated by colonial experiences (13-16). Thus, Indigenous peoples lag the general population in social, economic and health indicators (17, 18). Poverty, malnutrition, overcrowding, and inadequate health care services continue to impact the health of the indigenous people (19).

Indigenous peoples carry a disproportionate burden of harms associated with substance use (20). For example, compared to non-Indigenous people who inject drugs, Indigenous people who inject drugs are more likely to be infected with HIV and Hepatitis C and are less likely to receive treatment for substance use or have the support needed to remain on treatment (21,22). The rates of opioid use and opioid use disorder, as well as associated mortality and morbidity, are higher among Indigenous peoples compared to the general population. Furthermore, Indigenous youth, young adults, and young mothers are disproportionately affected by the opiate emergency (23-25).

The socio-political factors that arose from colonial practices against Indigenous people have also produced significant personal and structural barriers to health services (3). For example,

1  
2  
3 Indigenous people often experience racism in the health care system, limiting their access to health  
4 services (26,27,28).  
5  
6

7           The effect of intergenerational trauma and other health disparities have been remarkable  
8 for Indigenous children and adolescents, who are at a greater risk of adverse mental health  
9 outcomes (26). Suicide rates among Indigenous children and youth in Canada are 5-6 times higher  
10 than the national average (29-32). Among the Inuit youth, suicide rates are 11 times higher than the  
11 national average. Alcohol and substance use are risk factors for both committing and attempting  
12 suicide (33-35).  
13  
14  
15  
16  
17  
18  
19  
20

21           About 20% of Indigenous youth use substance use, of which 33% are under the age of 15  
22 years (36). These early exposures frequently occur in children's homes and communities. For  
23 example, a Statistics Canada (37) report on Indigenous persons found that 35% of First Nation  
24 people living off-reserve, 30% of Metis, and 39% of Inuit reported heavy drinking at least once a  
25 month for the past year, compared to 23% of non-Indigenous people. Further, 34.5% of First Nations  
26 adults reported drinking alcohol two to three times a month, 17.9% drank two to three times a  
27 week, and 3.2% drank daily (23). Roughly two-thirds (63.6%) of First Nations adults who had  
28 consumed alcohol in the past 12 months meet the criteria for heavy drinking, with 16.0% reporting  
29 heavy drinking weekly (23).  
30  
31  
32  
33  
34  
35  
36  
37  
38  
39  
40

41           Early initiation of substance use is associated with development later in life of substance-use  
42 related mental health issues, poor social and relational functioning, and legal and occupational  
43 problems (38-40). Early-onset of substance use may be a manifestation of an underlying vulnerability  
44 towards addictive behaviors or exposures to environmental conditions that increase or reinforce an  
45 individual's propensity towards substance use problems later in life (41-44). For instance,  
46 adolescents that use one class of substances, such as alcohol or tobacco, are more likely to progress  
47 to other illicit substances such as cannabis, methamphetamine, or cocaine (38,42,45,46). Disruption  
48 of brain development in adolescents using substances can increase risk of substance use disorders  
49  
50  
51  
52  
53  
54  
55  
56  
57  
58  
59  
60



1  
2  
3 later in life (47). Early use of alcohol and substances can also complicate treatment outcomes for  
4 clients, who often manifest with physical and mental impacts of chronic poly-substance use (18).  
5  
6

7  
8         Chen, Storr, & Anthony (42) have established a link between the early onset of substance  
9 use and a greater propensity for substance use disorders later in life. Numerous studies suggest that  
10 the rate of substance use increases during adolescence, peaks in young adulthood, and decreases in  
11 subsequent years(48,49). Delaying the onset of substance use can, therefore, minimize the  
12 trajectory of substance use during adolescence and prevent the development of substance use  
13 disorders in adulthood (50,51). A study authored by GM, an author in this manuscript on clients  
14 receiving methadone treatment for opiate use disorder, showed that clients were exposed to  
15 diverse substances at an early age- alcohol 6 years, marijuana, 7 years, Dilaudid, morphine, and  
16 cocaine (11 years), ritatin (8 years) and valium (13years) [22]. Studies show that Indigenous children  
17 experience early exposure to substance use compared to non-Indigenous people and are, likely to  
18 encounter diverse barriers, and determinants of health that may hinder access and retention to care  
19 (22, 52,53). Hence the need to focus on preventative measure for this population.  
20  
21  
22  
23  
24  
25  
26  
27  
28  
29  
30  
31  
32  
33

34         Elementary schools are a primary setting where pre-adolescent problems arise and where  
35 they can be prevented. School-based prevention programs can target large numbers of pre-  
36 adolescents in a relatively cost-effective and efficient manner (54). Randomized control trials have  
37 been central to legitimizing school-based substance use prevention programs(55,56). Reviews of  
38 these trials have found that evidence-based programming in schools is effective in preventing the  
39 early onset of substance use and the escalation of substance use in adolescence (57-59).  
40  
41  
42  
43  
44  
45  
46  
47

48         Effective school-based programs often involve social-emotional learning competencies,  
49 cognitive-behavioral approaches, changes in school climate, and multi-year and multi-component  
50 approaches (60). Efforts such as these may delay or prevent the onset of substance use among pre-  
51 adolescents.  
52  
53  
54  
55

56         There is a critical need to understand how to design and implement effective school-based  
57 interventions for substance use prevention aimed at Indigenous youth ages 7 -13. This scoping  
58  
59  
60

1  
2  
3 review aims to explore the research focusing on Indigenous people living in developed countries i.e.  
4 Canada, the US, Australia, and New Zealand. Although the authors recognize the distinct cultural and  
5 experiential differences between Indigenous peoples of these countries, they share common  
6 historical experiences that impact their health. The authors intend to carry out interventions  
7 focusing on these populations in Canada. Therefore, limiting the literature search to these four  
8 countries will ensure that the results are relatable to the Canadian context.  
9  
10  
11  
12  
13  
14  
15

## 16 **Methods**

17  
18  
19 The scoping review methodology has proven to be very useful for investigating the extent of  
20 the research in a given topic area. This type of synthesis review methodology was selected because  
21 of its rigorous and methodical approach that allows for openly framed research questions. Further, it  
22 was important that this review not be limited to only one evidence type (e.g., only randomized  
23 controlled trials), as our preliminary search determined that the literature included a variety of  
24 qualitative evidence sources.  
25  
26  
27  
28  
29  
30  
31

32 To ensure accurate and thorough reporting, the scoping review will be conducted following  
33 the six-stage approach described by Arksey and O'Malley (61) and refined by Levac, Colquhoun, &  
34 O'Brien (62): (1) Identifying the research question(s), (2) identifying relevant studies, (3) selecting the  
35 studies, (4) charting the data, (5) collating, summarizing, and reporting the results, and (6) consulting  
36 with experts. Further, the review will be reported using guidelines from the Preferred Reporting  
37 Items for Systematic reviews and Meta-Analyses extension for Scoping Reviews (PRISMA-ScR).  
38  
39  
40  
41  
42  
43  
44

45 **Ethics and dissemination:** Ethics review approval is not required for this project as the  
46 project is aimed at providing evidence for the presence of substance use interventions for  
47 Indigenous Elementary School children. Findings from this study will be presented to lay public, at  
48 scientific conferences and published in a peer reviewed journal.  
49  
50  
51  
52  
53

### 54 **Stage 1: Identifying the Research Questions**

55  
56 To start the process, we assembled a team of scholars with experiences working with  
57 Indigenous and marginalized communities. Consultations with the Health Science librarian helped  
58  
59  
60

1  
2  
3 her identify key phrases and words that represented the broader focus of Indigenous Elementary  
4 Substance use prevention. The research team identified one broad research question: 1) what is  
5 known about Indigenous elementary school-based interventions for preventing substance use? We  
6  
7 chose to focus on this population because GM's research indicating that clients with addictions had  
8  
9 been exposed to substances at a very young age (22). The librarian (MK) ran a trial search to  
10  
11 determine the feasibility of this research question. Following Arksey and O'Malley (61), our research  
12  
13 question was refined as we became more familiar with the literature. Aiming to carefully examine  
14  
15 and map the evidence on school-based interventions for preventing substance use in Indigenous  
16  
17 children ages 7-13, we developed the following research questions:  
18  
19  
20  
21

- 22  
23 1. What is known about elementary Indigenous school-based interventions for preventing  
24  
25 substance use?  
26  
27
- 28 2. What are the characteristics and outcomes of elementary school-based interventions for  
29  
30 preventing substance use?  
31

## 32 **Stage 2: Identifying Relevant Studies**

33  
34 As scoping reviews allow for flexibility in evidence type, our review will not be limited to any  
35  
36 specific qualitative or quantitative study design. To efficiently conduct searches in electronic  
37  
38 databases, some parameters are needed to help guide the search strategy.  
39  
40

### 41 **Eligibility Criteria**

42  
43 The following inclusion criteria were identified and used to guide the searches and review  
44  
45 the articles: 1) Only English language articles published between 2009-2019 will be included. Limiting  
46  
47 the project to the last 10 years is informed by the authors' belief that due to ever-changing and  
48  
49 dynamic substance use and addiction landscape, interventions older than ten years might not be  
50  
51 clinically relevant for informing interventions for elementary school children. 2) The population  
52  
53 targeted in the studies that identify Indigenous children ages 7-13 living in North America (Canada or  
54  
55 US), Australia, or New Zealand as one of the target population for intervention; 3) Studies that  
56  
57 comment on mixed-age populations of Indigenous children and adolescents will be included for full-  
58  
59  
60

1  
2  
3 text analysis to further explore their suitability for inclusion; 4) Studies will be discussing or  
4 presenting the intervention or the results of interventions for school-based substance use  
5 prevention for this target population.  
6  
7  
8

### 9 **Exclusion Criteria**

10 The following exclusion criteria were identified: 1) Articles discussing interventions for addictions  
11 such as smoking, gambling, internet/social media/technology, 2) articles discussing adult population  
12 (ages 18+), and 3). Review articles and commentaries.  
13  
14  
15  
16  
17

### 18 **Database searches**

19  
20 With input and in consultation with the research team, MK, an experienced health sciences  
21 librarian and familiar with evidence synthesis and reporting, established and tested the search  
22 strategy in MEDLINE identified relevant keywords. Controlled vocabulary was used to enhance  
23 sensitivity and specificity within the search. This preliminary search was developed and run to  
24 determine the feasibility of the scoping review and inform the searches in additional databases.  
25  
26  
27  
28  
29  
30

31  
32 The following electronic databases will be searched for published literature: MEDLINE in-process  
33 and other nonindexed citations (Ovid) – 1946 – Present; PubMed – 1966 – Present; EMBASE Classic  
34 (Ovid) – 1947 – Present; Cumulative Index of Nursing and Allied Health Literature (CINAHL) (EBSCO)  
35 – 1937 – Present; Educational Resources Information Center (ERIC) (Ovid) – 1965 – Present; Scopus  
36 (Elsevier) – 1970 – Present; and Cochrane Library (Wiley) and PsycINFO.  
37  
38  
39  
40  
41  
42

43 The results from each database search will be documented and saved, and references will be  
44 imported into EndNote, a bibliographic management software. Following the removal of duplicate  
45 references from EndNote, references will be imported into Rayyan, a review software (63) for title  
46 and abstract screening. Google Forms will be used to collect data during full-text analysis.  
47  
48  
49  
50  
51

52 To facilitate retrieval of relevant articles, the search was limited by language (English) and  
53 publication date (2009-2019). See Appendix A for full MEDLINE search strategies. In addition to  
54 searching electronic databases, the Canadian Agency for Drug and Technology in Health (CADTH)  
55 (64) tool will be used to search for relevant grey literature. The relevant areas to be searched from  
56  
57  
58  
59  
60

1  
2  
3 the CADTH (64) tool will include Health Technology Assessment (HTA) agencies (Canada, Australia,  
4 and USA), free and subscription-based databases, internet search engines, mental health, and  
5 nursing. Keywords identified throughout our search process will be utilized in the search process. We  
6  
7 will also check reference lists of included studies to identify any that had not been found in our other  
8  
9 searches.  
10  
11  
12

### 13 **Stage 3: Study selection**

14  
15 Rayyan will be used for the title/abstract screening process. The research team will identify  
16  
17 inclusion/exclusion keywords in correlation with identified inclusion and exclusion criteria. For  
18  
19 example, exclusion keywords for smoking, gambling, etc. as identified in exclusion criterion 1. Two  
20  
21 reviewers will independently review all articles. Should these 2 reviewers not reach a consensus, a  
22  
23 third reviewer will complete the title and abstract screening. This process will be repeated during the  
24  
25 full-text analysis; however, the mechanism for recording data and reviewing full-text articles will be  
26  
27 by EndNote. Google survey will be used to collect data (see below, "Charting the data").  
28  
29  
30  
31

### 32 **Stage 4: Charting the data**

33  
34 Review data extracted into a Google survey will include a) author(s), title, b) age groups of the target  
35  
36 population, c) Indigenous population identified, including the country of residence, d) summary of  
37  
38 intervention characteristics and e) intervention outcomes (Yes/No).  
39  
40

### 41 **Stage 5: Collating, summarizing, and reporting the results**

42  
43 The purpose of a scoping review is to map and aggregate findings to present an overview of the  
44  
45 topic. Accordingly, we plan to a) map the results (main sources, locations, and quantity), b) provide  
46  
47 a descriptive summary and qualitative analysis, c) identify conceptual definitions, d) provide a  
48  
49 glossary of terms to clarify definitions found in the literature and e) report our results using the  
50  
51 PRISMA-ScR guidelines for scoping reviews to enhance transparency and reproducibility. Because  
52  
53 this is a scoping review, we will not appraise the quality of the studies or offer statistical analysis.  
54  
55  
56  
57  
58  
59  
60

1  
2  
3 Information to be extracted and compiled into a table include; title of the articles, country of focus,  
4  
5 substance use intervention, intervention type, main findings, and lessons that can be learned.  
6

7 Thematic analysis will be applied to identify common threads that will emerge from the data.  
8  
9

### 10 **Stage 6: Consulting**

11  
12 We will present the preliminary findings of this scoping review to an advisory group comprised of an  
13  
14 Indigenous elder, a knowledge keeper, elementary school leadership, and community members of  
15  
16 one of the communities GM has a collaborative relationship with and one whose children are  
17  
18 impacted by substance use. Community partners working with GM will help identify the appropriate  
19  
20 advisory team members to join the committee. Presenting the findings to this committee will assist  
21  
22 in the validation of the results with the community and provide a basis for reflection and feedback  
23  
24 on the relevance of similar interventions in the community. Advisory committee feedback will inform  
25  
26 the discussion, recommendations, and implication for the practice section of the manuscript.  
27  
28  
29

### 30 **Patient and Public Involvement**

31  
32 This is a scoping review of literature aims to document evidence for the substance use prevention  
33  
34 for Indigenous elementary school children and is partly informed by project that GM is involved that  
35  
36 show early substance use for patients on opiate opioid agonist treatment which showed that clients  
37  
38 on this treatment were exposed to polysubstance from 6-13 years [22].. Patients and public were  
39  
40 not involved in the conceptualisation of the project, or the research question.  
41  
42  
43

### 44 **Results**

45  
46 The searches, title, and abstract screening are now complete. In the coming months, two  
47  
48 independent reviewers will conduct full-text analyses. During the process of full-text screening, we  
49  
50 will also extract data from the marked studies. We expect the scoping review to be completed by  
51  
52 late 2019/early 2020.  
53  
54

### 55 **Discussion**

56  
57 The decision to focus on Indigenous substance use prevention among elementary school  
58  
59 children was informed by a project undertaken by GM, on characteristics and predictors of clinical  
60

1  
2  
3 experiences of clients on methadone project (22, 65). In this study, it became clear that the age of  
4 exposure to an addictive substance such as opiates, alcohol, and marijuana is between 6-11 years.  
5  
6 Further, most of the clients on opiate replacement therapy struggle with treatment and recovery  
7  
8 with more than 70% dropping out of ORT in the first year. Furthermore, considering that 95% of the  
9  
10 clients on this study self-identified as Indigenous, who contend with diverse social determinants of  
11  
12 health that are a major barrier to the recovery from addiction, we believe that that emphasis should  
13  
14 be placed on understanding the substance use prevention intervention for elementary school  
15  
16 children, who are at a risk of substance use.  
17  
18  
19

20  
21 Understanding interventions to prevent substance use among Indigenous youth aged 7-13 is  
22  
23 vital to addressing substance use and addictions in the Indigenous population. Of interest, we will  
24  
25 seek to identify the philosophical and theoretical underpinnings that characterize these  
26  
27 interventions and the extent to which Indigenous knowledge is incorporated in these projects. The  
28  
29 problem of substance use and addictions cannot be overstated: findings of numerous studies show  
30  
31 that suggests that early exposure to substance use leads to life-long poly-substance use, which not  
32  
33 only causes complex comorbid conditions that are difficult and expensive to treat but also severely  
34  
35 impacts the quality of life of these individuals and their families (66-68). We, therefore, argue that  
36  
37 prevention is the best intervention for Indigenous communities struggling with substance use  
38  
39 challenges, considering they also content with other social determinants of health.  
40  
41  
42

43 The proposed scoping review has the potential to influence future policy, programs, and  
44  
45 services supporting the health and well being of Indigenous youth in Canada and beyond. It will  
46  
47 describe the nature and value of early strategies to prevent substance use in this group, and it will  
48  
49 provide exemplars of interventions that can be implemented in a Canadian, Australian, New Zealand,  
50  
51 and US settings.  
52  
53

#### 54 **Limitations of the review**

55  
56 Since the scoping review aims to assess the research activity on a topic and not the quality of the  
57  
58 research thereof, this project will provide an overview of all the intervention focussing on elementary  
59  
60

1  
2  
3 school-based Indigenous substance use prevention. The research team recognizes that focusing  
4 exclusively on substance use prevention projects catering to the 7-13 years old population may limit  
5 the number of reviews that can be included in the review. Therefore, some projects which might have  
6 provided relevant information to this review might be excluded on account of the age limit. Also, the  
7 exclusive focus on school-based interventions, means that any community-based substance use  
8 prevention focusing on this age group will be excluded. As a result, the review will not encompass the  
9 totality of diverse substance use prevention interventions for this population.  
10  
11  
12  
13  
14  
15  
16  
17  
18  
19  
20  
21  
22  
23  
24

#### 25 Reference

- 26  
27  
28 1. Gracey, M., & King M. Indigenous health part 1: Determinants and disease patterns. *Lancet*.  
29 2009;374:65 – 75.
- 30  
31  
32 2. Reid, J., Taylor-Moore, K., & Varona G. Towards a social-structural model for understanding  
33 current disparities in Maori health and well-being. *J Loss Trauma*. 2014;19(6):514–36.
- 34  
35  
36 3. Zambas, S. I., & Wright J. Impact of colonialism on Māori and Indigenous healthcare access:  
37 a discussion paper. *Contemp Nurse*. 2016;52(4):398–409.
- 38  
39  
40 4. Bombay A, Matheson K, Anisman H. The intergenerational effects of Indian Residential  
41 Schools: Implications for the concept of historical trauma. *Transcult Psychiatry* [Internet].  
42 2014 Jun 24;51(3):320–38. Available from:  
43 <http://journals.sagepub.com/doi/10.1177/1363461513503380>  
44  
45  
46  
47  
48  
49
- 50 5. Hirini PR, Collings SC. Whakamomori, He Whakaaro, He Kōrero Noa. Ministry of Health;  
51 2005.
- 52  
53  
54 6. Rege S. State of Indigenous mental health in Australia-a colonial legacy? *International*  
55 *Psychiatry*. 2009 Oct;6(4):98-100.
- 56  
57  
58  
59 7. Wirihana R, Smith C. Historical trauma, healing and well-being in Māori communities. *HE*  
60



- 1  
2  
3 RAU MURIMURI AROHA. 2019:2.  
4  
5  
6 8. Kirmayer LJ, Brass GM, Tait CL. The mental health of Aboriginal peoples: Transformations of  
7  
8 identity and community. *The Canadian Journal of Psychiatry*. 2000 Sep;45(7):607-16.  
9  
10 9. Marsh TN, Coholic D, Cote-Meek S, Najavits LM. Blending Aboriginal and Western healing  
11  
12 methods to treat intergenerational trauma with substance use disorder in Aboriginal  
13  
14 peoples who live in Northeastern Ontario, Canada. *Harm Reduct J [Internet]*. 2015 Dec  
15  
16 20;12(1):14. Available from: <http://www.harmreductionjournal.com/content/12/1/14>  
17  
18  
19 10. Gagne, MA. The role of dependency and colonialism in generation trauma in First Nations  
20  
21 citizens: The James Bay Cree. In: Y D, editor. *Intergenerational handbook of*  
22  
23 *multigenerational legacies of trauma*. New York: Plenum Press; 1998. p. 355–71.  
24  
25 11. Ross A, Dion J, Cantinotti M, Collin-Vézina D, Paquette L. Impact of residential schooling  
26  
27 and of child abuse on substance use problem in Indigenous Peoples. *Addict Behav*  
28  
29 *[Internet]*. 2015 Dec;51:184–92. Available from:  
30  
31 <https://linkinghub.elsevier.com/retrieve/pii/S0306460315002701>  
32  
33  
34 12. Nelson, S. (2013). Challenging hidden assumptions: colonial norms as determinants of  
35  
36 Aboriginal mental health. National Collaborating Centre for Aboriginal Health.  
37  
38  
39 13. Mikkonen, J., & Raphael, D. (2010). *Social Determinants of Health: The Canadian Facts*.  
40  
41 Toronto: York University School of Health Policy and Management.  
42  
43 [//www.thecanadianfacts.org/](http://www.thecanadianfacts.org/)  
44  
45 14. Reading, C., & Wien, F. (2013). Health inequalities and social determinants of health of  
46  
47 aboriginal people. National Collaborating centre for Aboriginal Health. Prince George BC.  
48  
49  
50 15. Gracey, M., & King, M. (2009). Indigenous health part 1: determinants and disease  
51  
52 patterns. *The Lancet*, 374(9683), 65-75.  
53  
54 16. Kolahdooz, F., Nader, F., Yi, K. J., & Sharma, S. (2015). Understanding the social  
55  
56 determinants of health among Indigenous Canadians: priorities for health promotion  
57  
58 policies and actions. *Global health action*, 8, 27968. doi:10.3402/gha.v8.27968  
59  
60

- 1  
2  
3 17. King, M., Smith, A., & Gracey, M. (2009). Indigenous health part 2: the underlying causes of  
4 the health gap. *The lancet*, 374(9683), 76-85
- 5  
6  
7 18. First Peoples Worldwide. (n.d). The challenges we face. Accessed at  
8  
9 <http://www.firstpeoples.org/the-challenges-we-face.htm>
- 10  
11  
12 19. National collaborating Centre for Aboriginal health ( n.d.). Setting the context: An overview  
13 of Aborigiginal Health in Canada. Accessed at [https://www.ccnca-nccah.ca/docs/context/FS-](https://www.ccnca-nccah.ca/docs/context/FS-OverviewAbororiginalHealth-EN.pdf)  
14 [OverviewAbororiginalHealth-EN.pdf](https://www.ccnca-nccah.ca/docs/context/FS-OverviewAbororiginalHealth-EN.pdf)
- 15  
16  
17 20. Urbanoski KA. Need for equity in treatment of substance use among Indigenous people in  
18 Canada. *Can Med Assoc J* [Internet]. 2017 Nov 6;189(44):E1350–1. Available from:  
19  
20  
21 <http://www.cmaj.ca/lookup/doi/10.1503/cmaj.171002>
- 22  
23  
24 21. Population Health Branch M of H. HIV Prevention and Control Program Report for 2015.  
25  
26 2016.
- 27  
28  
29 22. Maina G, Crizzle A, Maposa S, Fournier B. Sociodemographic Profiles and Clinical Outcomes  
30 for Clients on Methadone Maintenance Treatment in a Western Canadian Clinic. *J Forensic*  
31  
32  
33  
34  
35  
36  
37  
38  
39  
40  
41  
42  
43  
44  
45  
46  
47  
48  
49  
50  
51  
52  
53  
54  
55  
56  
57  
58  
59  
60 23. Centre FNIG. First Nations Regional Health Survey (RHS) 2008/10: National report on adults,  
youth and children living in First Nations communities. Ottawa; 2012.
24. Russell, C., Firestone, M., Kelly, L., Mushquash, C., Fischer B. Prescription opioid prescribing,  
use/misuse, harms and treatment among Indigenous people in Canada: a narrative review  
of available data and indicators. *Rural Remote Heal*. 2016;16(14):3974.
25. Kanate D, Folk D, Cirone S, Gordon J, Kirlaw M, Veale T, Bocking N, Rea S KL. Community-  
wide measures of wellness in a remote First Nations community experiencing opioid  
dependence: evaluating outpatient buprenorphine-naloxone substitution therapy in the  
context of a First Nations healing program. *Can Fam Physician*. 2016;61(2):160–5.
26. Herring, S., Spangaro, J., Lauw, M., & McNamara L (2013). he intersection of trauma, racism,

- 1  
2  
3 and cultural competence in effective work with Indigenous people: Waiting for trust. *Aust*  
4  
5 *Soc Work*. 2013;66(1):104–17.  
6  
7  
8 27. Durey, A. Reducing racism in Aboriginal health care in Australia: where does cultural  
9  
10 education fit? *Australian and New Zealand Journal of Public Health*. 2010; 34: S87-S92.  
11  
12 28. Awofeso, N. Racism, a major impediment to optimal indigenous health and health care in  
13  
14 Australia. *Australian Indigenous Health Bulletin*. 2011; 11(3): 1-8.  
15  
16 29. Czyzewski, K. (2011). Colonialism as a Broader Social Determinant of Health. *The*  
17  
18 *International Indigenous Policy Journal*, 2(1) . Retrieved from:  
19  
20  
21 <https://ir.lib.uwo.ca/iipj/vol2/iss1/5>. DOI: 10.18584/iipj.2011.2.1.5  
22  
23 30. Canadian Center on Substance Abuse. Substance use and suicide among youth: prevention  
24  
25 and intervention strategies. 2016. Accessed at.  
26  
27  
28 [https://www.ccsa.ca/sites/default/files/2019-04/CCSA-Substance-Use-Suicide-Prevention-](https://www.ccsa.ca/sites/default/files/2019-04/CCSA-Substance-Use-Suicide-Prevention-Youth-Summary-2016-en.pdf)  
29  
30 [Youth-Summary-2016-en.pdf](https://www.ccsa.ca/sites/default/files/2019-04/CCSA-Substance-Use-Suicide-Prevention-Youth-Summary-2016-en.pdf)  
31  
32 31. Aboriginal Healing Foundation. Suicide among Aboriginal people in Canada. Aboriginal  
33  
34 Healing Foundation. 2007. Ottawa, Ontario <http://www.ahf.ca/downloads/suicide.pdf>  
35  
36 32. Kumar, M. B., & Tjepkema, M. Suicide among First Nations people, Métis and Inuit (2011-  
37  
38 2016): Findings from the 2011 Canadian Census Health and Environment Cohort (CanCHEC).  
39  
40 33. Canada S. Suicide among First Nations people, Metis and Inuit (2011-2016): Findings from  
41  
42 the 2011 Canadian Census Health and Environment Cohort (CanCHEC). [Internet]. 2019.  
43  
44 Available from: [https://www150.statcan.gc.ca/n1/pub/99-011-x/99-011-x2019001-](https://www150.statcan.gc.ca/n1/pub/99-011-x/99-011-x2019001-eng.htm)  
45  
46 [eng.htm](https://www150.statcan.gc.ca/n1/pub/99-011-x/99-011-x2019001-eng.htm)  
47  
48 34. Centre for Disease Prevention ( CDC). Suicide Risks and Protective Factors. [Internet]. 2018.  
49  
50 Available from:  
51  
52 <https://www.cdc.gov/violenceprevention/suicide/riskprotectivefactors.html>  
53  
54 35. Kirmayer, L. J., Boothroyd, L. J., & Hodgins, S. (1998). Attempted suicide among Inuit youth:  
55  
56 psychosocial correlates and implications for prevention. *Canadian Journal of Psychiatry*,  
57  
58  
59  
60

- 1  
2  
3 43(8), 816–822  
4  
5  
6 36. Jetty R. Tobacco use and misuse among Indigenous children and youth in Canada. *Paediatr*  
7  
8 *Child Health*. 2017. 22(7):395–9.  
9  
10 37. Statistics Canada. Indigenous Peoples: Fact Sheet for Canada [Internet]. 2015. Available  
11  
12 from: <https://www150.statcan.gc.ca/n1/pub/89-656-x/89-656-x2015001-eng.htm>  
13  
14 38. Moss HB, Chen CM, Yi H. Early adolescent patterns of alcohol, cigarettes, and marijuana  
15  
16 polysubstance use and young adult substance use outcomes in a nationally representative  
17  
18 sample. *Drug Alcohol Depend* [Internet]. 2014 Mar;136:51–62. Available from:  
19  
20 <https://linkinghub.elsevier.com/retrieve/pii/S0376871613005279>  
21  
22  
23 39. U.S. Department of Health and Human Services (HHS) SA and M, (SAMHSA) HSA. No Title  
24  
25 [Internet]. 2017. Available from:  
26  
27 [https://alcoholpolicy.niaaa.nih.gov/sites/default/files/imce/users/u1743/stop\\_act\\_rtc\\_201](https://alcoholpolicy.niaaa.nih.gov/sites/default/files/imce/users/u1743/stop_act_rtc_2017.pdf)  
28  
29 [7.pdf](https://alcoholpolicy.niaaa.nih.gov/sites/default/files/imce/users/u1743/stop_act_rtc_2017.pdf)  
30  
31  
32 40. Swahn MH, Bossarte RM, Ashby JS, Meyers J. Pre-teen alcohol use initiation and suicide  
33  
34 attempts among middle and high school students: Findings from the 2006 Georgia Student  
35  
36 Health Survey. *Addict Behav* [Internet]. 2010 May;35(5):452–8. Available from:  
37  
38 <https://linkinghub.elsevier.com/retrieve/pii/S030646030900344X>  
39  
40  
41 41. King KM, Chassin L. A Prospective Study of the Effects of Age of Initiation of Alcohol and  
42  
43 Drug Use on Young Adult Substance Dependence\*. *J Stud Alcohol Drugs* [Internet]. 2007  
44  
45 Mar;68(2):256–65. Available from: <http://www.jsad.com/doi/10.15288/jsad.2007.68.256>  
46  
47  
48 42. Kirisci L, Tarter R, Ridenour T, Zhai ZW, Fishbein D, Reynolds M, et al. Age of alcohol and  
49  
50 cannabis use onset mediates the association of transmissible risk in childhood and  
51  
52 development of alcohol and cannabis disorders: Evidence for common liability. *Exp Clin*  
53  
54 *Psychopharmacol* [Internet]. 2013;21(1):38–45. Available from:  
55  
56 <http://doi.apa.org/getdoi.cfm?doi=10.1037/a0030742>  
57  
58  
59 43. Hicks JA, Friedman RS, Gable PA, Davis WE. Interactive effects of approach motivational  
60

- 1  
2  
3 intensity and alcohol cues on the scope of perceptual attention. *Addiction* [Internet]. 2012  
4 Jun;107(6):1074–80. Available from: [http://doi.wiley.com/10.1111/j.1360-](http://doi.wiley.com/10.1111/j.1360-0443.2012.03781.x)  
5  
6  
7 0443.2012.03781.x  
8  
9  
10 44. Kennett J, Vincent NA, Snoek A. Drug Addiction and Criminal Responsibility. In: Handbook  
11 of Neuroethics [Internet]. Dordrecht: Springer Netherlands; 2015. p. 1065–83. Available  
12 from: [http://link.springer.com/10.1007/978-94-007-4707-4\\_71](http://link.springer.com/10.1007/978-94-007-4707-4_71)  
13  
14  
15  
16 45. Degenhardt L, Randall D, Hall W, Law M, Butler T, Burns L. Mortality among clients of a  
17 state-wide opioid pharmacotherapy program over 20 years: Risk factors and lives saved.  
18 *Drug Alcohol Depend* [Internet]. 2009 Nov;105(1–2):9–15. Available from:  
19  
20  
21  
22  
23 <https://linkinghub.elsevier.com/retrieve/pii/S0376871609002300>  
24  
25  
26 46. Sartor CE, Waldron M, Duncan AE, Grant JD, McCutcheon V V., Nelson EC, et al. Childhood  
27 sexual abuse and early substance use in adolescent girls: the role of familial influences.  
28 *Addiction* [Internet]. 2013 May;108(5):993–1000. Available from:  
29  
30  
31  
32  
33 <http://doi.wiley.com/10.1111/add.12115>  
34  
35 47. Chen CY, Storr CL, Anthony JC. Early-onset drug use and risk for drug dependence  
36 problems. *Addictive behaviors*. 2009 Mar 1;34(3):319-22.  
37  
38  
39 48. Bachman, J. G., O'Malley, P. M., Schulenberg, J. E., Johnston, L. D., Bryant, A. L., & Merline  
40 AC. The decline of substance use in young adulthood: Changes in social activities, roles, and  
41 beliefs. Mahwah, NJ, US: Lawrence Erlbaum Associates Publishers.; 2002.  
42  
43  
44  
45 49. Hammond, C. J., Mayes, L. C., & Potenza MN. Neurobiology of adolescent substance use  
46 and addictive behaviors: prevention and treatment implications. *Adolescent medicine*.  
47  
48  
49  
50  
51  
52  
53 50. Lee C-YS, Winters KC, Wall MM. Trajectories of Substance Use Disorders in Youth:  
54 Identifying and Predicting Group Memberships. *J Child Adolesc Subst Abuse* [Internet].  
55  
56  
57  
58  
59  
60 2010 Mar 26;19(2):135–57. Available from:  
<http://www.tandfonline.com/doi/abs/10.1080/10678281003634975>

- 1  
2  
3 51. Jordan CJ, Andersen SL. Sensitive periods of substance abuse: Early risk for the transition to  
4 dependence. *Dev Cogn Neurosci* [Internet]. 2017 Jun;25:29–44. Available from:  
5  
6 <https://linkinghub.elsevier.com/retrieve/pii/S1878929316301931>  
7  
8  
9
- 10 52. Caria MP, Faggiano F, Bellocco R, Galanti MR. Effects of a School-Based Prevention Program  
11 on European Adolescents' Patterns of Alcohol Use. *J Adolesc Heal* [Internet]. 2011  
12 Feb;48(2):182–8. Available from:  
13  
14 <https://linkinghub.elsevier.com/retrieve/pii/S1054139X10002673>  
15  
16  
17  
18
- 19 53. Griffin KW, Bang H, Botvin GJ. Age of alcohol and marijuana use onset predicts weekly  
20 substance use and related psychosocial problems during young adulthood. *J Subst Use*  
21 [Internet]. 2010 Jun 10;15(3):174–83. Available from:  
22  
23 <http://www.tandfonline.com/doi/full/10.3109/14659890903013109>  
24  
25  
26  
27
- 28 54. Salvo, N., Bennett, J., Cheung, A., Chen, Y., Rice, M., Rush, B., Bullock, H., Bowlby A.  
29 Prevention of Of, substance use in children/adolescents with mental disorders: *Can Acad*  
30 *Child Adolesc Psychiatry*. 2012;21(4):245–52.  
31  
32  
33
- 34 55. Logan-Greene P, Semanchin Jones A. Predicting chronic neglect: Understanding risk and  
35 protective factors for CPS-involved families. *Child Fam Soc Work* [Internet]. 2018  
36 May;23(2):264–72. Available from: <http://doi.wiley.com/10.1111/cfs.12414>  
37  
38  
39  
40
- 41 56. Goldberg JM, Sklad M, Elfrink TR, Schreurs KMG, Bohlmeijer ET, Clarke AM. Effectiveness of  
42 interventions adopting a whole school approach to enhancing social and emotional  
43 development: a meta-analysis. *Eur J Psychol Educ* [Internet]. 2019 Oct 30;34(4):755–82.  
44  
45 Available from: <http://link.springer.com/10.1007/s10212-018-0406-9>  
46  
47  
48  
49
- 50 57. Australian Institute of Health and Welfare. Drug use among Aboriginal and Torres Strait  
51 Islander peoples. An assessment of data sources. 2006.  
52  
53 [https://www.aihw.gov.au/getmedia/a72e5e3b-8316-4242-bed5](https://www.aihw.gov.au/getmedia/a72e5e3b-8316-4242-bed5e68ad46c6641/duaatsip.pdf.aspx?inline=true)  
54  
55  
56  
57  
58  
59  
60

- 1  
2  
3 58. Snijder, M., Stapinski, L., Lees, B., Newton, N., Champion, K., Chapman, C., ... & Teesson, M.  
4 Substance use prevention programs for indigenous adolescents in the United States of  
5 America, Canada, Australia and New Zealand: protocol for a systematic review. *JMIR*  
6 research protocols. 2018; 7(2): e38.  
7  
8  
9  
10  
11  
12 59. Miller, T.R. and HD. How should governments spend the drug prevention dollar: A buyer's  
13 guide. In: Stockwell, T., Gruenewald, P., Toumbourou, J., and Loxley W, editor. Preventing  
14 harmful substance use: The evidence base for policy and practice. England: John Wiley &  
15 Sons.; 2005. p. 415–31.  
16  
17  
18  
19  
20  
21 60. Faggiano F, Vigna-Taglianti F, Burkhart G, Bohrn K, Cuomo L, Gregori D, et al. The  
22 effectiveness of a school-based substance abuse prevention program: 18-Month follow-up  
23 of the EU-Dap cluster randomized controlled trial. *Drug Alcohol Depend* [Internet]. 2010  
24 Apr;108(1–2):56–64. Available from:  
25 <https://linkinghub.elsevier.com/retrieve/pii/S0376871609004384>  
26  
27  
28  
29  
30  
31  
32 61. Arksey H, O'Malley L. Scoping studies: towards a methodological framework. *Int J Soc Res*  
33 *Methodol* [Internet]. 2005 Feb;8(1):19–32. Available from:  
34 <http://www.tandfonline.com/doi/abs/10.1080/1364557032000119616>  
35  
36  
37  
38  
39 62. Levac D, Colquhoun H, O'Brien KK. Scoping studies: advancing the methodology. *Implement*  
40 *Sci* [Internet]. 2010 Dec 20;5(1):69. Available from:  
41 <http://implementationscience.biomedcentral.com/articles/10.1186/1748-5908-5-69>  
42  
43  
44  
45 63. Ouzzani M, Hammady H, Fedorowicz Z, Elmagarmid A. Rayyan—a web and mobile app for  
46 systematic reviews. *Syst Rev* [Internet]. 2016 Dec 5;5(1):210. Available from:  
47 <http://systematicreviewsjournal.biomedcentral.com/articles/10.1186/s13643-016-0384-4>  
48  
49  
50  
51  
52 64. CADTH. Grey matters: a practical tool for searching health-related grey literature (internet).  
53 Ottawa, <https://www.cadth.ca/resources/finding-evidence> (2018, accessed 14 November  
54 2019).  
55  
56  
57  
58  
59 65. Maina G, Tahir H, Docabo A, Kahia N, Brunelle C. Exploring health-care providers'  
60

- 1  
2  
3 experiences in the care of clients on opioid agonist treatment in two western Canadian  
4  
5 clinics. *Canadian Journal of Nursing Research*. 2019 Apr 16:0844562119842751.  
6  
7  
8 66. Charles, N. E., Mathias, C. W., Acheson, A., & Dougherty, D. M. (2017). Preadolescent  
9  
10 sensation seeking and early adolescent stress relate to at-risk adolescents' substance use  
11  
12 by age 15. *Addictive behaviors*, 69, 1-7.  
13  
14 67. De Genna, N. M., Larkby, C., & Cornelius, M. D. (2007). Early and adverse experiences with  
15  
16 sex and alcohol are associated with adolescent drinking before and during pregnancy.  
17  
18 *Addictive behaviors*, 32(12), 2799-2810.  
19  
20 68. Odgers, C. L., Caspi, A., Nagin, D. S., Piquero, A. R., Slutske, W. S., Milne, B. J., ... & Moffitt,  
21  
22 T. E. (2008). Is it important to prevent early exposure to drugs and alcohol among  
23  
24 adolescents?. *Psychological Science*, 19(10), 1037-1044.  
25  
26  
27  
28  
29  
30  
31  
32  
33  
34  
35  
36  
37  
38  
39  
40  
41  
42  
43  
44  
45  
46  
47  
48  
49  
50  
51  
52  
53  
54  
55  
56  
57  
58  
59  
60



### Contributions:

- Dr. Geoffrey Maina was involved in the conceptualisation and writing of the protocol.
- Taryn Phaneuf was involved in the literature search, writing the introductory section, and proofreading the protocol.
- Maeve Mclean was involved in the literature search, writing the introductory section, and proofreading the protocol.
- Megan Kennedy was involved in designing the search strategy and writing the methods section.
- Dr. Ann Gakumo was involved in editing and proofreading the manuscript.
- Dr. Joseph Nguemo was involved in editing and proofreading the manuscript.
- Dr. Alexandra King was involved in editing and proofreading the manuscript.
- Solomon Kasha Mcharo was involved in the revision and formatting of the manuscript.

### Funding

This work was supported by the Faculty Recruitment and Retention Fund, University of Saskatchewan fund no. 419054.

**Conflicts of interests':** The authors have no conflicts of interest to declare.

Word count: 3255

## Appendix A

## Search Strategy – MEDLINE

The following search was run in Ovid MEDLINE on April 22, 2019:

|    |                                                                                                                                                                                                                  |  |
|----|------------------------------------------------------------------------------------------------------------------------------------------------------------------------------------------------------------------|--|
| 1  | alaska natives/ or indians, central american/ or indians, north american/ or indians, south american/ or inuits/                                                                                                 |  |
| 2  | Oceanic Ancestry Group/                                                                                                                                                                                          |  |
| 3  | (indigenous or Indigenous* or "first nation" or "first nations" or metis or native or natives or "first people" or "first peoples" or "on reserve" or "off reserve" or inuit* or eskimo* or maori*).ab,ti,kw,kf. |  |
| 4  | Health Services, Indigenous/                                                                                                                                                                                     |  |
| 5  | or/1-4                                                                                                                                                                                                           |  |
| 6  | Child/                                                                                                                                                                                                           |  |
| 7  | (children? or child? or young or youth? or juvenile? or kid or kids or underage* or preteen* or preadolescen*).ab,ti,kw.                                                                                         |  |
| 8  | ((school or under) adj1 age*) or (pre adj1 (teen* or adolescen*))).ab,ti,kf                                                                                                                                      |  |
| 9  | ((elementary or primary or middle or grade or grammar or junior or secondary) adj1 school*).ab,ti,kf.                                                                                                            |  |
| 10 | "junior high".ab,ti,tw.                                                                                                                                                                                          |  |
| 11 | Schools/                                                                                                                                                                                                         |  |
| 12 | or/6-11                                                                                                                                                                                                          |  |
| 13 | 5 and 12                                                                                                                                                                                                         |  |
| 14 | exp Substance-Related Disorders/ed, pc, px [Education, Prevention & Control, Psychology]                                                                                                                         |  |
| 15 | exp Alcohol-Related Disorders/pc, px [Prevention & Control, Psychology]                                                                                                                                          |  |
| 16 | exp Opioid-Related Disorders/pc, px [Prevention & Control, Psychology]                                                                                                                                           |  |

|    |                                                                                                                                                                                                                               |  |
|----|-------------------------------------------------------------------------------------------------------------------------------------------------------------------------------------------------------------------------------|--|
| 17 | exp Prescription Drug Misuse/pc, px [Prevention & Control, Psychology]                                                                                                                                                        |  |
| 18 | or/ 14-17                                                                                                                                                                                                                     |  |
| 19 | Underage Drinking/                                                                                                                                                                                                            |  |
| 20 | Drug-Seeking Behavior/                                                                                                                                                                                                        |  |
| 21 | exp "Marijuana Use"/                                                                                                                                                                                                          |  |
| 22 | ((legal* or illegal* or prescription or illicit or street or club) adj1 (drug? or medication?)).ab,ti,kf.                                                                                                                     |  |
| 23 | ((binge or underage or "under age" or teen or adolescent?) adj1 (drink* or alcohol)).ab,ti,kf.                                                                                                                                |  |
| 24 | controlled substances/ or medical marijuana/ or prescription drugs/ or exp street drugs/ or exp synthetic drugs/                                                                                                              |  |
| 25 | exp "hypnotics and sedatives"/ or exp narcotics/ or exp analgesics, opioid/ or exp hallucinogens/ or performance-enhancing substances/                                                                                        |  |
| 26 | opium/ or (heroin or opium or smack or dope or horse or "china white").ab,ti,tw                                                                                                                                               |  |
| 27 | exp cannabinoids/ or cannabis/ or (marijuana or weed or pot or hash or hashish or ganja or blunt? or joint? or "mary jane" or reefer or CBD or cannbin* or cannabis).ab,ti,tw                                                 |  |
| 28 | Central Nervous System Stimulants/ or (cocaine or coke or "crack cocaine" or amphetamine? or methamphetamine? or meth or crank or speed or upper? or "club drug" or "club drugs" or MDMA or ecstasy or molly or GHB).ab,ti,tw |  |
| 29 | ketamine/ or phencyclidine/ or exp salvia/ or dextromethorphan/ or ("dissociative drugs" or "dissociative drug" or "special k" or PCP or "angel dust" or robotripping).ab,ti,tw.                                              |  |

|    |                                                                                                                                                                               |  |
|----|-------------------------------------------------------------------------------------------------------------------------------------------------------------------------------|--|
| 30 | mescaline/ or psilocybin/ or exp testosterone congeners/ or (hallucinogen* or LSD or acid or peyote or "magic mushrooms" or shrooms or "anabolic steroids" or roids).ab,ti,tw |  |
| 31 | nitrous oxide/ or (inhalant? or "laughing gas" or popper? or snapper? or whippets or huffing).ab,ti,tw                                                                        |  |
| 32 | Or/ 19-31                                                                                                                                                                     |  |
| 33 | (abus* or misus* or "inappropriate use").ab,ti,tw                                                                                                                             |  |
| 34 | (prevent* or intervention or intervene or program? or programme? or activit* or support* or initiative?).ab,ti,tw.                                                            |  |
| 35 | school health services/ or health education/ or health promotion/                                                                                                             |  |
| 36 | 34 or 35                                                                                                                                                                      |  |
| 37 | 32 and 33 and 36                                                                                                                                                              |  |
| 38 | 18 or 37                                                                                                                                                                      |  |
| 39 | 13 and 38                                                                                                                                                                     |  |
| 40 | limit 39 to (english language and yr="2009 -Current")                                                                                                                         |  |

# BMJ Open

## School-based interventions for preventing substance use in Indigenous children ages 7-13: A scoping review protocol

|                                 |                                                                                                                                                                                                                                                                                                                                                                                                                                                                                                                                                                                              |
|---------------------------------|----------------------------------------------------------------------------------------------------------------------------------------------------------------------------------------------------------------------------------------------------------------------------------------------------------------------------------------------------------------------------------------------------------------------------------------------------------------------------------------------------------------------------------------------------------------------------------------------|
| Journal:                        | <i>BMJ Open</i>                                                                                                                                                                                                                                                                                                                                                                                                                                                                                                                                                                              |
| Manuscript ID                   | bmjopen-2019-034032.R3                                                                                                                                                                                                                                                                                                                                                                                                                                                                                                                                                                       |
| Article Type:                   | Protocol                                                                                                                                                                                                                                                                                                                                                                                                                                                                                                                                                                                     |
| Date Submitted by the Author:   | 22-Jan-2020                                                                                                                                                                                                                                                                                                                                                                                                                                                                                                                                                                                  |
| Complete List of Authors:       | Maina , Geoffrey; University of Saskatchewan, College of Nursing<br>Phaneuf, Taryn; University of Saskatchewan College of Nursing<br>Kennedy, Megan ; University of Alberta, Library<br>Mclean, Maeve ; University of Saskatchewan College of Graduate Studies and Research, Public Health<br>Gakumo, Ann ; University of Massachusetts Boston, Nursing<br>Nguemo, Joseph; Ryerson University, Daphne Cockwell School of Nursing;<br>King , Alexandra ; University of Saskatchewan College of Medicine, Medicine<br>Mcharo, Solomon ; University of Saskatchewan College of Nursing, Nursing |
| <b>Primary Subject Heading</b>: | Addiction                                                                                                                                                                                                                                                                                                                                                                                                                                                                                                                                                                                    |
| Secondary Subject Heading:      | Addiction, Public health                                                                                                                                                                                                                                                                                                                                                                                                                                                                                                                                                                     |
| Keywords:                       | alcohol, substance use, addiction, elementary schools, prevention                                                                                                                                                                                                                                                                                                                                                                                                                                                                                                                            |
|                                 |                                                                                                                                                                                                                                                                                                                                                                                                                                                                                                                                                                                              |

SCHOLARONE™  
Manuscripts

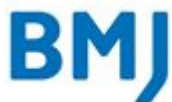

I, the Submitting Author has the right to grant and does grant on behalf of all authors of the Work (as defined in the below author licence), an exclusive licence and/or a non-exclusive licence for contributions from authors who are: i) UK Crown employees; ii) where BMJ has agreed a CC-BY licence shall apply, and/or iii) in accordance with the terms applicable for US Federal Government officers or employees acting as part of their official duties; on a worldwide, perpetual, irrevocable, royalty-free basis to BMJ Publishing Group Ltd ("BMJ") its licensees and where the relevant Journal is co-owned by BMJ to the co-owners of the Journal, to publish the Work in this journal and any other BMJ products and to exploit all rights, as set out in our [licence](#).

The Submitting Author accepts and understands that any supply made under these terms is made by BMJ to the Submitting Author unless you are acting as an employee on behalf of your employer or a postgraduate student of an affiliated institution which is paying any applicable article publishing charge ("APC") for Open Access articles. Where the Submitting Author wishes to make the Work available on an Open Access basis (and intends to pay the relevant APC), the terms of reuse of such Open Access shall be governed by a Creative Commons licence – details of these licences and which [Creative Commons](#) licence will apply to this Work are set out in our licence referred to above.

Other than as permitted in any relevant BMJ Author's Self Archiving Policies, I confirm this Work has not been accepted for publication elsewhere, is not being considered for publication elsewhere and does not duplicate material already published. I confirm all authors consent to publication of this Work and authorise the granting of this licence.

1  
2  
3 **School-based interventions for preventing substance use in Indigenous children ages 7-13: A**  
4  
5 **scoping review protocol**  
6  
7

8 **Authors:**  
9

- 10 1. \*Dr. Geoffrey Maina, Assistant Professor, College of Nursing, University of Saskatchewan.  
11  
12 210-1301 Central Avenue, Prince Albert, S5V 4W1 SK.  
13  
14 Tel: 306-765-3887; email: [geoffrey.maina@usask.ca](mailto:geoffrey.maina@usask.ca)  
15  
16 2. Taryn Phaneuf, Undergraduate Nursing student, College of Nursing, University of  
17  
18 Saskatchewan. Email: [tlp044@mail.usask.ca](mailto:tlp044@mail.usask.ca)  
19  
20 3. Megan Kennedy, Librarian- Library and Museums - Public Services 2, University of Alberta,  
21  
22 Edmonton. Email: [mrkenned@ualberta.ca](mailto:mrkenned@ualberta.ca)  
23  
24 4. Maeve Mclean, Graduate student, Master of Public Health, University of Saskatchewan,  
25  
26 Saskatoon Campus. [Maeve.mclean@usask.ca](mailto:Maeve.mclean@usask.ca)  
27  
28 5. Dr. Ann Gakumo, Associate Professor of Nursing, and Department Chair of Nursing,  
29  
30 University of Massachusetts, Boston. Email: [ann.gakumo@umb.edu](mailto:ann.gakumo@umb.edu)  
31  
32 6. Dr. Joseph D. Nguemo Djimetio, weSpeak Postdoc fellow, Daphne Cockwell School of  
33  
34 Nursing, Faculty of Community Services, Ryerson University. Email:  
35  
36 [jnguemodjimetio@ryerson.ca](mailto:jnguemodjimetio@ryerson.ca)  
37  
38 7. Dr. Alexandra King, Cameco Chair in Indigenous Health, University of Saskatchewan. Email:  
39  
40 [alexandra.king@usask.ca](mailto:alexandra.king@usask.ca)  
41  
42 8. Solomon Kasha Mcharo, PhD(c). College of Nursing, University of Saskatchewan. Saskatoon  
43  
44 Campus. Email: [kasha.mcharo@usask.ca](mailto:kasha.mcharo@usask.ca)  
45  
46  
47  
48  
49  
50  
51

52 \* Corresponding author: Dr. Geoffrey Maina  
53  
54  
55  
56  
57  
58  
59  
60

## Abstract

**Introduction:** Throughout the world, Indigenous peoples share traumatic colonial experiences that have caused gross inequalities for them and continue to impact every aspect of their lives. The effect of intergenerational trauma and other health disparities have been remarkable for Indigenous children and adolescents, who are at a greater risk of adverse mental health and addiction outcomes compared to non-Indigenous people of the same age. Most Indigenous children are exposed to addictive substances at an early age which often leads to early initiation of substance use and is associated with subsequent physical and mental health issues, poor social and relational functioning, and occupational and legal problems. The aim of this paper is to report the protocol for the scoping review of school-based interventions for substance use prevention in Indigenous children ages 7-13 living in Canada, the US, Australia, and New Zealand. This scoping review seeks to answer the following questions: 1) What is known about Indigenous school-based interventions for preventing substance use 2) What are the characteristics and outcomes of school-based interventions for preventing substance use?

**Methods and analysis:** This scoping review will use steps described by Arksey and O'Malley (2005) & Levac, Colquhoun, & O'Brien (2010): (1) identifying the research question(s); (2) identifying relevant studies; (3) selecting the studies; (4) charting the data; (5) collating, summarizing and reporting the results; and (6) consulting with experts. Our findings will be reported according to the guidelines set by the Preferred Reporting Items for Systematic Reviews and Meta-Analyses extension for Scoping Reviews (PRISMA-ScR).

**Ethics and dissemination:** Ethics review approval is not required for this project. Findings from this study will be presented to lay public, at scientific conferences and published in a peer-reviewed journal.



## Article summary

### Strengths and limitations of this study

- This scoping review will lead to a better understanding of the nature, characteristics, and outcomes of interventions for Indigenous pre-teen alcohol and substance use prevention.
- This study is limited to literature published in English between January 2009 and December 2019.
- Since the scoping review aims to assess the research activity on a topic and not the quality of the research thereof, this project will provide an overview of all the intervention focussing on elementary school-based Indigenous substance use prevention.
- This study is also limited to research in Canada, the US, Australia, and New Zealand, and the findings will only be relevant to these countries.

Keywords: alcohol; substance use; addiction; prevention; elementary school; Indigenous

review only

## Background

Indigenous peoples worldwide share traumatic colonial experiences that continue to impact every aspect of their lives (1, 2). These historical socio-political processes have been attributed to causing gross inequalities for this population(3). Colonization, the imposition of colonial institutions and rules, and subsequent disruption of the Aboriginal way of life continue to have significant negative impacts on the lives and health of indigenous people. In Canada, residential school experiences of physical, sexual, and emotional violence, along with other legacies of colonization, have had dramatic and far-reaching impacts that continue to cause negative health consequences for Indigenous people (4). The resultant intergenerational trauma, which gets institutionalized within the family and the community, is associated with increased risks of mental health problems and addictions (5-11)

Colonization is now regarded as a determinant of health, as it impacts many aspects of Indigenous peoples' wellbeing (12). Moreover, in Canada, Aboriginal status is regarded as a determinant of health due to the numerous determinants of health they contend with, which are potentiated by colonial experiences (13-16). Thus, Indigenous peoples lag the general population in social, economic and health indicators (17, 18). Poverty, malnutrition, overcrowding, and inadequate health care services continue to impact the health of the indigenous people (19).

Indigenous peoples carry a disproportionate burden of harms associated with substance use (20). For example, compared to non-Indigenous people who inject drugs, Indigenous people who inject drugs are more likely to be infected with HIV and Hepatitis C and are less likely to receive treatment for substance use or have the support needed to remain on treatment (21,22). The rates of opioid use and opioid use disorder, as well as associated mortality and morbidity, are higher among Indigenous peoples compared to the general population. Furthermore, Indigenous youth, young adults, and young mothers are disproportionately affected by the **opioid** emergency (23-25).

The socio-political factors that arose from colonial practices against Indigenous people have also produced significant personal and structural barriers to health services (3). For example,

1  
2  
3 Indigenous people often experience racism in the health care system, limiting their access to health  
4 services (26,27,28).  
5  
6

7 The effect of intergenerational trauma and other health disparities have been remarkable  
8 for Indigenous children and adolescents, who are at a greater risk of adverse mental health  
9 outcomes (26). Suicide rates among Indigenous children and youth in Canada are 5-6 times higher  
10 than the national average (29-32). Among the Inuit youth, suicide rates are 11 times higher than the  
11 national average. Alcohol and substance use are risk factors for both committing and attempting  
12 suicide (33-35).  
13  
14  
15  
16  
17  
18  
19  
20

21 About 20% of Indigenous youth use substance use, of which 33% are under the age of 15  
22 years (36). These early exposures frequently occur in children's homes and communities. For  
23 example, a Statistics Canada (37) report on Indigenous persons found that 35% of First Nation  
24 people living off-reserve, 30% of Metis, and 39% of Inuit reported heavy drinking at least once a  
25 month for the past year, compared to 23% of non-Indigenous people. Further, 34.5% of First Nations  
26 adults reported drinking alcohol two to three times a month, 17.9% drank two to three times a  
27 week, and 3.2% drank daily (23). Roughly two-thirds (63.6%) of First Nations adults who had  
28 consumed alcohol in the past 12 months meet the criteria for heavy drinking, with 16.0% reporting  
29 heavy drinking weekly (23).  
30  
31  
32  
33  
34  
35  
36  
37  
38  
39  
40

41 Early initiation of substance use is associated with development later in life of substance-use  
42 related mental health issues, poor social and relational functioning, and legal and occupational  
43 problems (38-40). Early-onset of substance use may be a manifestation of an underlying vulnerability  
44 towards addictive behaviors or exposures to environmental conditions that increase or reinforce an  
45 individual's propensity towards substance use problems later in life (41-44). For instance,  
46 adolescents that use one class of substances, such as alcohol or tobacco, are more likely to progress  
47 to other illicit substances such as cannabis, methamphetamine, or cocaine (38,42,45,46). Disruption  
48 of brain development in adolescents using substances can increase risk of substance use disorders  
49  
50  
51  
52  
53  
54  
55  
56  
57  
58  
59  
60

1  
2  
3 later in life (47). Early use of alcohol and substances can also complicate treatment outcomes for  
4 clients, who often manifest with physical and mental impacts of chronic poly-substance use (18).  
5  
6

7  
8         Chen, Storr, & Anthony (42) have established a link between the early onset of substance  
9 use and a greater propensity for substance use disorders later in life. Numerous studies suggest that  
10 the rate of substance use increases during adolescence, peaks in young adulthood, and decreases in  
11 subsequent years(48,49). Delaying the onset of substance use can, therefore, minimize the  
12 trajectory of substance use during adolescence and prevent the development of substance use  
13 disorders in adulthood (50,51). A study authored by GM, an author in this manuscript on clients  
14 receiving methadone treatment for opiate use disorder, showed that clients were exposed to  
15 diverse substances at an early age- alcohol 6 years, marijuana, 7 years, Dilaudid, morphine, and  
16 cocaine (11 years), ritatin (8 years) and valium (13years) [22]. Studies show that Indigenous children  
17 experience early exposure to substance use compared to non-Indigenous people and are, likely to  
18 encounter diverse barriers, and determinants of health that may hinder access and retention to care  
19 (22, 52,53). Hence the need to focus on preventative measure for this population.  
20  
21  
22  
23  
24  
25  
26  
27  
28  
29  
30  
31  
32  
33

34         Elementary schools are a primary setting where pre-adolescent problems arise and where  
35 they can be prevented. School-based prevention programs can target large numbers of pre-  
36 adolescents in a relatively cost-effective and efficient manner (54). Randomized control trials have  
37 been central to legitimizing school-based substance use prevention programs(55,56). Reviews of  
38 these trials have found that evidence-based programming in schools is effective in preventing the  
39 early onset of substance use and the escalation of substance use in adolescence (57-59).  
40  
41  
42  
43  
44  
45  
46  
47

48         Effective school-based programs often involve social-emotional learning competencies,  
49 cognitive-behavioral approaches, changes in school climate, and multi-year and multi-component  
50 approaches (60). Efforts such as these may delay or prevent the onset of substance use among pre-  
51 adolescents.  
52  
53  
54  
55

56  
57         There is a critical need to understand how to design and implement effective school-based  
58 interventions for substance use prevention aimed at Indigenous youth ages 7 -13. This scoping  
59  
60

1  
2  
3 review aims to explore the research focusing on Indigenous people living in developed countries i.e.  
4 Canada, the US, Australia, and New Zealand. Although the authors recognize the distinct cultural and  
5 experiential differences between Indigenous peoples of these countries, they share common  
6 historical experiences that impact their health. The authors intend to carry out interventions  
7 focusing on these populations in Canada. Therefore, limiting the literature search to these four  
8 countries will ensure that the results are relatable to the Canadian context.  
9  
10  
11  
12  
13  
14  
15

## 16 **Methods**

17  
18  
19 The scoping review methodology has proven to be very useful for investigating the extent of  
20 the research in a given topic area. This type of synthesis review methodology was selected because  
21 of its rigorous and methodical approach that allows for openly framed research questions. Further, it  
22 was important that this review not be limited to only one evidence type (e.g., only randomized  
23 controlled trials), as our preliminary search determined that the literature included a variety of  
24 qualitative evidence sources.  
25  
26  
27  
28  
29  
30  
31

32 To ensure accurate and thorough reporting, the scoping review will be conducted following  
33 the six-stage approach described by Arksey and O'Malley (61) and refined by Levac, Colquhoun, &  
34 O'Brien (62): (1) Identifying the research question(s), (2) identifying relevant studies, (3) selecting the  
35 studies, (4) charting the data, (5) collating, summarizing, and reporting the results, and (6) consulting  
36 with experts. Further, the review will be reported using guidelines from the Preferred Reporting  
37 Items for Systematic reviews and Meta-Analyses extension for Scoping Reviews (PRISMA-ScR).  
38  
39  
40  
41  
42  
43  
44

45 **Ethics and dissemination:** Ethics review approval is not required for this project as the  
46 project is aimed at providing evidence for the presence of substance use interventions for  
47 Indigenous Elementary School children. Findings from this study will be presented to lay public, at  
48 scientific conferences and published in a peer reviewed journal.  
49  
50  
51  
52  
53

### 54 **Stage 1: Identifying the Research Questions**

55  
56 To start the process, we assembled a team of scholars with experiences working with  
57 Indigenous and marginalized communities. Consultations with the Health Science librarian helped  
58  
59  
60

1  
2  
3 her identify key phrases and words that represented the broader focus of Indigenous Elementary  
4 Substance use prevention. The research team identified one broad research question: 1) what is  
5 known about Indigenous elementary school-based interventions for preventing substance use? We  
6 chose to focus on this population because GM's research indicating that clients with addictions had  
7 been exposed to substances at a very young age (22). The librarian (MK) ran a trial search to  
8 determine the feasibility of this research question. Following Arksey and O'Malley (61), our research  
9 question was refined as we became more familiar with the literature. Aiming to carefully examine  
10 and map the evidence on school-based interventions for preventing substance use in Indigenous  
11 children ages 7-13, we developed the following research questions:

- 22 1. What is known about elementary Indigenous school-based interventions for preventing  
23 substance use?
- 24 2. What are the characteristics and outcomes of elementary school-based interventions for  
25 preventing substance use?

## 31 **Stage 2: Identifying Relevant Studies**

32 As scoping reviews allow for flexibility in evidence type, our review will not be limited to any  
33 specific qualitative or quantitative study design. To efficiently conduct searches in electronic  
34 databases, some parameters are needed to help guide the search strategy.

### 35 **Eligibility Criteria**

36 The following inclusion criteria were identified and used to guide the searches and review  
37 the articles: 1) Only English language articles published between 2009-2019 will be included. Limiting  
38 the project to the last 10 years is informed by the authors' belief that due to ever-changing and  
39 dynamic substance use and addiction landscape, interventions older than ten years might not be  
40 clinically relevant for informing interventions for elementary school children. 2) The population  
41 targeted in the studies that identify Indigenous children ages 7-13 living in North America (Canada or  
42 US), Australia, or New Zealand as one of the target population for intervention; 3) Studies that  
43 comment on mixed-age populations of Indigenous children and adolescents will be included for full-  
44  
45  
46  
47  
48  
49  
50  
51  
52  
53  
54  
55  
56  
57  
58  
59  
60

1  
2  
3 text analysis to further explore their suitability for inclusion; 4) Studies will be discussing or  
4 presenting the intervention or the results of interventions for school-based substance use  
5 prevention for this target population.  
6  
7

### 8 **Exclusion Criteria**

9  
10 The following exclusion criteria were identified: 1) Articles discussing interventions for addictions  
11 such as smoking, gambling, internet/social media/technology, 2) articles discussing adult population  
12 (ages 18+), and 3). Review articles and commentaries.  
13  
14  
15  
16  
17

### 18 **Database searches**

19  
20 With input and in consultation with the research team, MK, an experienced health sciences  
21 librarian and familiar with evidence synthesis and reporting, established and tested the search  
22 strategy in MEDLINE identified relevant keywords. Controlled vocabulary was used to enhance  
23 sensitivity and specificity within the search. This preliminary search was developed and run to  
24 determine the feasibility of the scoping review and inform the searches in additional databases.  
25  
26  
27  
28  
29  
30

31  
32 The following electronic databases will be searched for published literature: MEDLINE in-process  
33 and other nonindexed citations (Ovid) – 1946 – Present; PubMed – 1966 – Present; EMBASE Classic  
34 (Ovid) – 1947 – Present; Cumulative Index of Nursing and Allied Health Literature (CINAHL) (EBSCO)  
35 – 1937 – Present; Educational Resources Information Center (ERIC) (Ovid) – 1965 – Present; Scopus  
36 (Elsevier) – 1970 – Present; and Cochrane Library (Wiley) and PsycINFO (1806 - present).  
37  
38  
39  
40  
41  
42

43 The results from each database search will be documented and saved, and references will be  
44 imported into EndNote, a bibliographic management software. Following the removal of duplicate  
45 references from EndNote, references will be imported into Rayyan, a review software (63) for title  
46 and abstract screening. Google Forms will be used to collect data during full-text analysis.  
47  
48  
49  
50  
51

52 To facilitate retrieval of relevant articles, the search was limited by language (English) and  
53 publication date (2009-2019). See Appendix A for full MEDLINE search strategies. In addition to  
54 searching electronic databases, the Canadian Agency for Drug and Technology in Health (CADTH)  
55 (64) tool will be used to search for relevant grey literature. The relevant areas to be searched from  
56  
57  
58  
59  
60

1  
2  
3 the CADTH (64) tool will include Health Technology Assessment (HTA) agencies (Canada, Australia,  
4 and USA), free and subscription-based databases, internet search engines, mental health, and  
5 nursing. Keywords identified throughout our search process will be utilized in the search process. We  
6  
7 will also check reference lists of included studies to identify any that had not been found in our other  
8  
9 searches.  
10  
11  
12

### 13 **Stage 3: Study selection**

14  
15 Rayyan will be used for the title/abstract screening process. The research team will identify  
16  
17 inclusion/exclusion keywords in correlation with identified inclusion and exclusion criteria. For  
18  
19 example, exclusion keywords for smoking, gambling, etc. as identified in exclusion criterion 1. Two  
20  
21 reviewers will independently review all articles. Should these 2 reviewers not reach a consensus, a  
22  
23 third reviewer will complete the title and abstract screening. This process will be repeated during the  
24  
25 full-text analysis; however, the mechanism for recording data and reviewing full-text articles will be  
26  
27 by EndNote. Google survey will be used to collect data (see below, "Charting the data").  
28  
29  
30  
31

### 32 **Stage 4: Charting the data**

33  
34 Review data extracted into a Google survey will include a) author(s), title, b) age groups of the target  
35  
36 population, c) Indigenous population identified, including the country of residence, d) summary of  
37  
38 intervention characteristics and e) intervention outcomes (Yes/No).  
39  
40

### 41 **Stage 5: Collating, summarizing, and reporting the results**

42  
43 The purpose of a scoping review is to map and aggregate findings to present an overview of the  
44  
45 topic. Accordingly, we plan to a) map the results (main sources, locations, and quantity), b) provide  
46  
47 a descriptive summary and qualitative analysis, c) identify conceptual definitions, d) provide a  
48  
49 glossary of terms to clarify definitions found in the literature and e) report our results using the  
50  
51 PRISMA-ScR guidelines for scoping reviews to enhance transparency and reproducibility. Because  
52  
53 this is a scoping review, we will not appraise the quality of the studies or offer statistical analysis.  
54  
55  
56  
57  
58  
59  
60



1  
2  
3 Information to be extracted and compiled into a table include; title of the articles, country of focus,  
4  
5 substance use intervention, intervention type, main findings, and lessons that can be learned.

6  
7 Thematic analysis will be applied to identify common threads that will emerge from the data.

### 8 9 10 **Stage 6: Consulting**

11  
12 We will present the preliminary findings of this scoping review to an advisory group comprised of an  
13  
14 Indigenous elder, a knowledge keeper, elementary school leadership, and community members of  
15  
16 one of the communities GM has a collaborative relationship with and one whose children are  
17  
18 impacted by substance use. Community partners working with GM will help identify the appropriate  
19  
20 advisory team members to join the committee. Presenting the findings to this committee will assist  
21  
22 in the validation of the results with the community and provide a basis for reflection and feedback  
23  
24 on the relevance of similar interventions in the community. Advisory committee feedback will inform  
25  
26 the discussion, recommendations, and implication for the practice section of the manuscript.

### 27 28 29 30 **Patient and Public Involvement**

31  
32 This is a scoping review of literature aims to document evidence for the substance use prevention  
33  
34 for Indigenous elementary school children and is partly informed by project that GM is involved that  
35  
36 show early substance use for patients on opioid agonist treatment which showed that clients on this  
37  
38 treatment were exposed to polysubstance from 6-13 years [22].. Patients and public were not  
39  
40 involved in the conceptualisation of the project, or the research question.

### 41 42 43 **Results**

44  
45 The searches, title, and abstract screening are ongoing. In the coming months, two independent  
46  
47 reviewers will conduct full-text analyses. During the process of full-text screening, we will also  
48  
49 extract data from the marked studies. We expect the scoping review to be completed by late  
50  
51 2019/early 2020.

### 52 53 54 **Discussion**

55  
56 The decision to focus on Indigenous substance use prevention among elementary school  
57  
58 children was informed by a project undertaken by GM, on characteristics and predictors of clinical  
59  
60

1  
2  
3 experiences of clients on methadone project (22, 65). In this study, it became clear that the age of  
4 exposure to an addictive substance such as **opioids**, alcohol, and marijuana is between 6-11 years.  
5  
6 Further, most of the clients on opiate replacement therapy struggle with treatment and recovery  
7  
8 with more than 70% dropping out of ORT in the first year. Furthermore, considering that 95% of the  
9  
10 clients on this study self-identified as Indigenous, who contend with diverse social determinants of  
11  
12 health that are a major barrier to the recovery from addiction, we believe that that emphasis should  
13  
14 be placed on understanding the substance use prevention intervention for elementary school  
15  
16 children, who are at a risk of substance use.  
17  
18  
19

20  
21 Understanding interventions to prevent substance use among Indigenous youth aged 7-13 is  
22  
23 vital to addressing substance use and addictions in the Indigenous population. Of interest, we will  
24  
25 seek to identify the philosophical and theoretical underpinnings that characterize these  
26  
27 interventions and the extent to which Indigenous knowledge is incorporated in these projects. The  
28  
29 problem of substance use and addictions cannot be overstated: findings of numerous studies show  
30  
31 that suggests that early exposure to substance use leads to life-long poly-substance use, which not  
32  
33 only causes complex comorbid conditions that are difficult and expensive to treat but also severely  
34  
35 impacts the quality of life of these individuals and their families (66-68). We, therefore, argue that  
36  
37 prevention is the best intervention for Indigenous communities struggling with substance use  
38  
39 challenges, considering they also content with other social determinants of health.  
40  
41  
42

43 The proposed scoping review has the potential to influence future policy, programs, and  
44  
45 services supporting the health and well being of Indigenous youth in Canada and beyond. It will  
46  
47 describe the nature and value of early strategies to prevent substance use in this group, and it will  
48  
49 provide exemplars of interventions that can be implemented in a Canadian, Australian, New Zealand,  
50  
51 and US settings.  
52  
53

#### 54 **Limitations of the review**

55  
56 Since the scoping review aims to assess the research activity on a topic and not the quality of the  
57  
58 research thereof, this project will provide an overview of all the intervention focussing on elementary  
59  
60

1  
2  
3 school-based Indigenous substance use prevention. The research team recognizes that focusing  
4 exclusively on substance use prevention projects catering to the 7-13 years old population may limit  
5 the number of reviews that can be included in the review. Therefore, some projects which might have  
6 provided relevant information to this review might be excluded on account of the age limit. Also, the  
7 exclusive focus on school-based interventions, means that any community-based substance use  
8 prevention focusing on this age group will be excluded. As a result, the review will not encompass the  
9 totality of diverse substance use prevention interventions for this population.  
10  
11  
12  
13  
14  
15  
16  
17  
18  
19  
20  
21  
22  
23  
24

#### 25 Reference

- 26  
27  
28 1. Gracey, M., & King M. Indigenous health part 1: Determinants and disease patterns. *Lancet*.  
29 2009;374:65 – 75.
- 30  
31  
32 2. Reid, J., Taylor-Moore, K., & Varona G. Towards a social-structural model for understanding  
33 current disparities in Maori health and well-being. *J Loss Trauma*. 2014;19(6):514–36.
- 34  
35  
36 3. Zambas, S. I., & Wright J. Impact of colonialism on Māori and Indigenous healthcare access:  
37 a discussion paper. *Contemp Nurse*. 2016;52(4):398–409.
- 38  
39  
40 4. Bombay A, Matheson K, Anisman H. The intergenerational effects of Indian Residential  
41 Schools: Implications for the concept of historical trauma. *Transcult Psychiatry* [Internet].  
42 2014 Jun 24;51(3):320–38. Available from:  
43 <http://journals.sagepub.com/doi/10.1177/1363461513503380>  
44  
45  
46  
47  
48  
49
- 50 5. Hirini PR, Collings SC. Whakamomori, He Whakaaro, He Kōrero Noa. Ministry of Health;  
51 2005.
- 52  
53  
54 6. Rege S. State of Indigenous mental health in Australia-a colonial legacy? *International*  
55 *Psychiatry*. 2009 Oct;6(4):98-100.
- 56  
57  
58  
59 7. Wirihana R, Smith C. Historical trauma, healing and well-being in Māori communities. *HE*  
60

- 1  
2  
3 RAU MURIMURI AROHA. 2019:2.  
4  
5 8. Kirmayer LJ, Brass GM, Tait CL. The mental health of Aboriginal peoples: Transformations of  
6 identity and community. *The Canadian Journal of Psychiatry*. 2000 Sep;45(7):607-16.  
7  
8 9. Marsh TN, Coholic D, Cote-Meek S, Najavits LM. Blending Aboriginal and Western healing  
9 methods to treat intergenerational trauma with substance use disorder in Aboriginal  
10 peoples who live in Northeastern Ontario, Canada. *Harm Reduct J [Internet]*. 2015 Dec  
11 20;12(1):14. Available from: <http://www.harmreductionjournal.com/content/12/1/14>  
12  
13 10. Gagne, MA. The role of dependency and colonialism in generation trauma in First Nations  
14 citizens: The James Bay Cree. In: Y D, editor. *Intergenerational handbook of*  
15 *multigenerational legacies of trauma*. New York: Plenum Press; 1998. p. 355–71.  
16  
17 11. Ross A, Dion J, Cantinotti M, Collin-Vézina D, Paquette L. Impact of residential schooling  
18 and of child abuse on substance use problem in Indigenous Peoples. *Addict Behav*  
19 [Internet]. 2015 Dec;51:184–92. Available from:  
20 <https://linkinghub.elsevier.com/retrieve/pii/S0306460315002701>  
21  
22 12. Nelson, S. (2013). Challenging hidden assumptions: colonial norms as determinants of  
23 Aboriginal mental health. National Collaborating Centre for Aboriginal Health.  
24  
25 13. Mikkonen, J., & Raphael, D. (2010). *Social Determinants of Health: The Canadian Facts*.  
26 Toronto: York University School of Health Policy and Management.  
27 [//www.thecanadianfacts.org/](http://www.thecanadianfacts.org/)  
28  
29 14. Reading, C., & Wien, F. (2013). Health inequalities and social determinants of health of  
30 aboriginal people. National Collaborating centre for Aboriginal Health. Prince George BC.  
31  
32 15. Gracey, M., & King, M. (2009). Indigenous health part 1: determinants and disease  
33 patterns. *The Lancet*, 374(9683), 65-75.  
34  
35 16. Kolahdooz, F., Nader, F., Yi, K. J., & Sharma, S. (2015). Understanding the social  
36 determinants of health among Indigenous Canadians: priorities for health promotion  
37 policies and actions. *Global health action*, 8, 27968. doi:10.3402/gha.v8.27968  
38  
39  
40  
41  
42  
43  
44  
45  
46  
47  
48  
49  
50  
51  
52  
53  
54  
55  
56  
57  
58  
59  
60

- 1  
2  
3 17. King, M., Smith, A., & Gracey, M. (2009). Indigenous health part 2: the underlying causes of  
4 the health gap. *The lancet*, 374(9683), 76-85
- 5  
6  
7 18. First Peoples Worldwide. (n.d). The challenges we face. Accessed at  
8  
9 <http://www.firstpeoples.org/the-challenges-we-face.htm>
- 10  
11  
12 19. National collaborating Centre for Aboriginal health ( n.d.). Setting the context: An overview  
13 of Aborigiginal Health in Canada. Accessed at [https://www.ccnca-nccah.ca/docs/context/FS-](https://www.ccnca-nccah.ca/docs/context/FS-OverviewAbororiginalHealth-EN.pdf)  
14 [OverviewAbororiginalHealth-EN.pdf](https://www.ccnca-nccah.ca/docs/context/FS-OverviewAbororiginalHealth-EN.pdf)
- 15  
16  
17 20. Urbanoski KA. Need for equity in treatment of substance use among Indigenous people in  
18 Canada. *Can Med Assoc J* [Internet]. 2017 Nov 6;189(44):E1350–1. Available from:  
19  
20  
21 <http://www.cmaj.ca/lookup/doi/10.1503/cmaj.171002>
- 22  
23  
24 21. Population Health Branch M of H. HIV Prevention and Control Program Report for 2015.  
25  
26 2016.
- 27  
28  
29 22. Maina G, Crizzle A, Maposa S, Fournier B. Sociodemographic Profiles and Clinical Outcomes  
30 for Clients on Methadone Maintenance Treatment in a Western Canadian Clinic. *J Forensic*  
31  
32  
33  
34  
35  
36  
37  
38  
39  
40  
41  
42  
43  
44  
45  
46  
47  
48  
49  
50  
51  
52  
53  
54  
55  
56  
57  
58  
59  
60 23. Centre FNIG. First Nations Regional Health Survey (RHS) 2008/10: National report on adults,  
youth and children living in First Nations communities. Ottawa; 2012.
24. Russell, C., Firestone, M., Kelly, L., Mushquash, C., Fischer B. Prescription opioid prescribing,  
use/misuse, harms and treatment among Indigenous people in Canada: a narrative review  
of available data and indicators. *Rural Remote Heal*. 2016;16(14):3974.
25. Kanate D, Folk D, Cirone S, Gordon J, Kirlaw M, Veale T, Bocking N, Rea S KL. Community-  
wide measures of wellness in a remote First Nations community experiencing opioid  
dependence: evaluating outpatient buprenorphine-naloxone substitution therapy in the  
context of a First Nations healing program. *Can Fam Physician*. 2016;61(2):160–5.
26. Herring, S., Spangaro, J., Lauw, M., & McNamara L (2013). he intersection of trauma, racism,

- 1  
2  
3 and cultural competence in effective work with Indigenous people: Waiting for trust. *Aust*  
4  
5 *Soc Work*. 2013;66(1):104–17.  
6  
7  
8 27. Durey, A. Reducing racism in Aboriginal health care in Australia: where does cultural  
9  
10 education fit? *Australian and New Zealand Journal of Public Health*. 2010; 34: S87-S92.  
11  
12 28. Awofeso, N. Racism, a major impediment to optimal indigenous health and health care in  
13  
14 Australia. *Australian Indigenous Health Bulletin*. 2011; 11(3): 1-8.  
15  
16 29. Czyzewski, K. (2011). Colonialism as a Broader Social Determinant of Health. *The*  
17  
18 *International Indigenous Policy Journal*, 2(1) . Retrieved from:  
19  
20  
21 <https://ir.lib.uwo.ca/iipj/vol2/iss1/5>. DOI: 10.18584/iipj.2011.2.1.5  
22  
23 30. Canadian Center on Substance Abuse. Substance use and suicide among youth: prevention  
24  
25 and intervention strategies. 2016. Accessed at.  
26  
27  
28 [https://www.ccsa.ca/sites/default/files/2019-04/CCSA-Substance-Use-Suicide-Prevention-](https://www.ccsa.ca/sites/default/files/2019-04/CCSA-Substance-Use-Suicide-Prevention-Youth-Summary-2016-en.pdf)  
29  
30 [Youth-Summary-2016-en.pdf](https://www.ccsa.ca/sites/default/files/2019-04/CCSA-Substance-Use-Suicide-Prevention-Youth-Summary-2016-en.pdf)  
31  
32 31. Aboriginal Healing Foundation. Suicide among Aboriginal people in Canada. Aboriginal  
33  
34 Healing Foundation. 2007. Ottawa, Ontario <http://www.ahf.ca/downloads/suicide.pdf>  
35  
36 32. Kumar, M. B., & Tjepkema, M. Suicide among First Nations people, Métis and Inuit (2011-  
37  
38 2016): Findings from the 2011 Canadian Census Health and Environment Cohort (CanCHEC).  
39  
40 33. Canada S. Suicide among First Nations people, Metis and Inuit (2011-2016): Findings from  
41  
42 the 2011 Canadian Census Health and Environment Cohort (CanCHEC). [Internet]. 2019.  
43  
44 Available from: [https://www150.statcan.gc.ca/n1/pub/99-011-x/99-011-x2019001-](https://www150.statcan.gc.ca/n1/pub/99-011-x/99-011-x2019001-eng.htm)  
45  
46 [eng.htm](https://www150.statcan.gc.ca/n1/pub/99-011-x/99-011-x2019001-eng.htm)  
47  
48 34. Centre for Disease Prevention ( CDC). Suicide Risks and Protective Factors. [Internet]. 2018.  
49  
50 Available from:  
51  
52 <https://www.cdc.gov/violenceprevention/suicide/riskprotectivefactors.html>  
53  
54 35. Kirmayer, L. J., Boothroyd, L. J., & Hodgins, S. (1998). Attempted suicide among Inuit youth:  
55  
56 psychosocial correlates and implications for prevention. *Canadian Journal of Psychiatry*,  
57  
58  
59  
60

- 1  
2  
3 43(8), 816–822  
4  
5  
6 36. Jetty R. Tobacco use and misuse among Indigenous children and youth in Canada. *Paediatr*  
7  
8 *Child Health*. 2017. 22(7):395–9.  
9  
10 37. Statistics Canada. Indigenous Peoples: Fact Sheet for Canada [Internet]. 2015. Available  
11  
12 from: <https://www150.statcan.gc.ca/n1/pub/89-656-x/89-656-x2015001-eng.htm>  
13  
14 38. Moss HB, Chen CM, Yi H. Early adolescent patterns of alcohol, cigarettes, and marijuana  
15  
16 polysubstance use and young adult substance use outcomes in a nationally representative  
17  
18 sample. *Drug Alcohol Depend* [Internet]. 2014 Mar;136:51–62. Available from:  
19  
20 <https://linkinghub.elsevier.com/retrieve/pii/S0376871613005279>  
21  
22  
23 39. U.S. Department of Health and Human Services (HHS) SA and M, (SAMHSA) HSA. No Title  
24  
25 [Internet]. 2017. Available from:  
26  
27 [https://alcoholpolicy.niaaa.nih.gov/sites/default/files/imce/users/u1743/stop\\_act\\_rtc\\_201](https://alcoholpolicy.niaaa.nih.gov/sites/default/files/imce/users/u1743/stop_act_rtc_2017.pdf)  
28  
29 [7.pdf](https://alcoholpolicy.niaaa.nih.gov/sites/default/files/imce/users/u1743/stop_act_rtc_2017.pdf)  
30  
31  
32 40. Swahn MH, Bossarte RM, Ashby JS, Meyers J. Pre-teen alcohol use initiation and suicide  
33  
34 attempts among middle and high school students: Findings from the 2006 Georgia Student  
35  
36 Health Survey. *Addict Behav* [Internet]. 2010 May;35(5):452–8. Available from:  
37  
38 <https://linkinghub.elsevier.com/retrieve/pii/S030646030900344X>  
39  
40  
41 41. King KM, Chassin L. A Prospective Study of the Effects of Age of Initiation of Alcohol and  
42  
43 Drug Use on Young Adult Substance Dependence\*. *J Stud Alcohol Drugs* [Internet]. 2007  
44  
45 Mar;68(2):256–65. Available from: <http://www.jsad.com/doi/10.15288/jsad.2007.68.256>  
46  
47  
48 42. Kirisci L, Tarter R, Ridenour T, Zhai ZW, Fishbein D, Reynolds M, et al. Age of alcohol and  
49  
50 cannabis use onset mediates the association of transmissible risk in childhood and  
51  
52 development of alcohol and cannabis disorders: Evidence for common liability. *Exp Clin*  
53  
54 *Psychopharmacol* [Internet]. 2013;21(1):38–45. Available from:  
55  
56 <http://doi.apa.org/getdoi.cfm?doi=10.1037/a0030742>  
57  
58  
59 43. Hicks JA, Friedman RS, Gable PA, Davis WE. Interactive effects of approach motivational  
60

- 1  
2  
3 intensity and alcohol cues on the scope of perceptual attention. *Addiction* [Internet]. 2012  
4 Jun;107(6):1074–80. Available from: [http://doi.wiley.com/10.1111/j.1360-](http://doi.wiley.com/10.1111/j.1360-0443.2012.03781.x)  
5  
6  
7 0443.2012.03781.x  
8  
9  
10 44. Kennett J, Vincent NA, Snoek A. Drug Addiction and Criminal Responsibility. In: Handbook  
11 of Neuroethics [Internet]. Dordrecht: Springer Netherlands; 2015. p. 1065–83. Available  
12 from: [http://link.springer.com/10.1007/978-94-007-4707-4\\_71](http://link.springer.com/10.1007/978-94-007-4707-4_71)  
13  
14  
15  
16 45. Degenhardt L, Randall D, Hall W, Law M, Butler T, Burns L. Mortality among clients of a  
17 state-wide opioid pharmacotherapy program over 20 years: Risk factors and lives saved.  
18 *Drug Alcohol Depend* [Internet]. 2009 Nov;105(1–2):9–15. Available from:  
19  
20  
21  
22  
23 <https://linkinghub.elsevier.com/retrieve/pii/S0376871609002300>  
24  
25  
26 46. Sartor CE, Waldron M, Duncan AE, Grant JD, McCutcheon V V., Nelson EC, et al. Childhood  
27 sexual abuse and early substance use in adolescent girls: the role of familial influences.  
28 *Addiction* [Internet]. 2013 May;108(5):993–1000. Available from:  
29  
30  
31  
32  
33 <http://doi.wiley.com/10.1111/add.12115>  
34  
35 47. Chen CY, Storr CL, Anthony JC. Early-onset drug use and risk for drug dependence  
36 problems. *Addictive behaviors*. 2009 Mar 1;34(3):319-22.  
37  
38  
39 48. Bachman, J. G., O'Malley, P. M., Schulenberg, J. E., Johnston, L. D., Bryant, A. L., & Merline  
40 AC. The decline of substance use in young adulthood: Changes in social activities, roles, and  
41 beliefs. Mahwah, NJ, US: Lawrence Erlbaum Associates Publishers.; 2002.  
42  
43  
44  
45 49. Hammond, C. J., Mayes, L. C., & Potenza MN. Neurobiology of adolescent substance use  
46 and addictive behaviors: prevention and treatment implications. *Adolescent medicine*.  
47  
48  
49  
50  
51  
52  
53 50. Lee C-YS, Winters KC, Wall MM. Trajectories of Substance Use Disorders in Youth:  
54 Identifying and Predicting Group Memberships. *J Child Adolesc Subst Abuse* [Internet].  
55  
56  
57  
58  
59 2010 Mar 26;19(2):135–57. Available from:  
60  
<http://www.tandfonline.com/doi/abs/10.1080/10678281003634975>



- 1  
2  
3 51. Jordan CJ, Andersen SL. Sensitive periods of substance abuse: Early risk for the transition to  
4 dependence. *Dev Cogn Neurosci* [Internet]. 2017 Jun;25:29–44. Available from:  
5  
6 <https://linkinghub.elsevier.com/retrieve/pii/S1878929316301931>  
7  
8  
9
- 10 52. Caria MP, Faggiano F, Bellocco R, Galanti MR. Effects of a School-Based Prevention Program  
11 on European Adolescents' Patterns of Alcohol Use. *J Adolesc Heal* [Internet]. 2011  
12 Feb;48(2):182–8. Available from:  
13  
14 <https://linkinghub.elsevier.com/retrieve/pii/S1054139X10002673>  
15  
16  
17  
18
- 19 53. Griffin KW, Bang H, Botvin GJ. Age of alcohol and marijuana use onset predicts weekly  
20 substance use and related psychosocial problems during young adulthood. *J Subst Use*  
21 [Internet]. 2010 Jun 10;15(3):174–83. Available from:  
22  
23 <http://www.tandfonline.com/doi/full/10.3109/14659890903013109>  
24  
25  
26  
27
- 28 54. Salvo, N., Bennett, J., Cheung, A., Chen, Y., Rice, M., Rush, B., Bullock, H., Bowlby A.  
29 Prevention of Of, substance use in children/adolescents with mental disorders: *Can Acad*  
30 *Child Adolesc Psychiatry*. 2012;21(4):245–52.  
31  
32  
33
- 34 55. Logan-Greene P, Semanchin Jones A. Predicting chronic neglect: Understanding risk and  
35 protective factors for CPS-involved families. *Child Fam Soc Work* [Internet]. 2018  
36 May;23(2):264–72. Available from: <http://doi.wiley.com/10.1111/cfs.12414>  
37  
38  
39  
40
- 41 56. Goldberg JM, Sklad M, Elfrink TR, Schreurs KMG, Bohlmeijer ET, Clarke AM. Effectiveness of  
42 interventions adopting a whole school approach to enhancing social and emotional  
43 development: a meta-analysis. *Eur J Psychol Educ* [Internet]. 2019 Oct 30;34(4):755–82.  
44  
45 Available from: <http://link.springer.com/10.1007/s10212-018-0406-9>  
46  
47  
48  
49
- 50 57. Australian Institute of Health and Welfare. Drug use among Aboriginal and Torres Strait  
51 Islander peoples. An assessment of data sources. 2006.  
52  
53 [https://www.aihw.gov.au/getmedia/a72e5e3b-8316-4242-bed5](https://www.aihw.gov.au/getmedia/a72e5e3b-8316-4242-bed5e68ad46c6641/duaatsip.pdf.aspx?inline=true)  
54  
55  
56  
57  
58  
59  
60

- 1  
2  
3 58. Snijder, M., Stapinski, L., Lees, B., Newton, N., Champion, K., Chapman, C., ... & Teesson, M.  
4 Substance use prevention programs for indigenous adolescents in the United States of  
5 America, Canada, Australia and New Zealand: protocol for a systematic review. *JMIR*  
6 research protocols. 2018; 7(2): e38.  
7  
8  
9  
10  
11  
12 59. Miller, T.R. and HD. How should governments spend the drug prevention dollar: A buyer's  
13 guide. In: Stockwell, T., Gruenewald, P., Toumbourou, J., and Loxley W, editor. Preventing  
14 harmful substance use: The evidence base for policy and practice. England: John Wiley &  
15 Sons.; 2005. p. 415–31.  
16  
17  
18  
19  
20  
21 60. Faggiano F, Vigna-Taglianti F, Burkhart G, Bohrn K, Cuomo L, Gregori D, et al. The  
22 effectiveness of a school-based substance abuse prevention program: 18-Month follow-up  
23 of the EU-Dap cluster randomized controlled trial. *Drug Alcohol Depend* [Internet]. 2010  
24 Apr;108(1–2):56–64. Available from:  
25 <https://linkinghub.elsevier.com/retrieve/pii/S0376871609004384>  
26  
27  
28  
29  
30  
31  
32 61. Arksey H, O'Malley L. Scoping studies: towards a methodological framework. *Int J Soc Res*  
33 *Methodol* [Internet]. 2005 Feb;8(1):19–32. Available from:  
34 <http://www.tandfonline.com/doi/abs/10.1080/1364557032000119616>  
35  
36  
37  
38  
39 62. Levac D, Colquhoun H, O'Brien KK. Scoping studies: advancing the methodology. *Implement*  
40 *Sci* [Internet]. 2010 Dec 20;5(1):69. Available from:  
41 <http://implementationscience.biomedcentral.com/articles/10.1186/1748-5908-5-69>  
42  
43  
44  
45 63. Ouzzani M, Hammady H, Fedorowicz Z, Elmagarmid A. Rayyan—a web and mobile app for  
46 systematic reviews. *Syst Rev* [Internet]. 2016 Dec 5;5(1):210. Available from:  
47 <http://systematicreviewsjournal.biomedcentral.com/articles/10.1186/s13643-016-0384-4>  
48  
49  
50  
51  
52 64. CADTH. Grey matters: a practical tool for searching health-related grey literature (internet).  
53 Ottawa, <https://www.cadth.ca/resources/finding-evidence> (2018, accessed 14 November  
54 2019).  
55  
56  
57  
58  
59 65. Maina G, Tahir H, Docabo A, Kahia N, Brunelle C. Exploring health-care providers'  
60

- 1  
2  
3 experiences in the care of clients on opioid agonist treatment in two western Canadian  
4  
5 clinics. *Canadian Journal of Nursing Research*. 2019 Apr 16:0844562119842751.  
6  
7  
8 66. Charles, N. E., Mathias, C. W., Acheson, A., & Dougherty, D. M. (2017). Preadolescent  
9  
10 sensation seeking and early adolescent stress relate to at-risk adolescents' substance use  
11  
12 by age 15. *Addictive behaviors*, 69, 1-7.  
13  
14 67. De Genna, N. M., Larkby, C., & Cornelius, M. D. (2007). Early and adverse experiences with  
15  
16 sex and alcohol are associated with adolescent drinking before and during pregnancy.  
17  
18 *Addictive behaviors*, 32(12), 2799-2810.  
19  
20 68. Odgers, C. L., Caspi, A., Nagin, D. S., Piquero, A. R., Slutske, W. S., Milne, B. J., ... & Moffitt,  
21  
22 T. E. (2008). Is it important to prevent early exposure to drugs and alcohol among  
23  
24 adolescents?. *Psychological Science*, 19(10), 1037-1044.  
25  
26  
27  
28  
29  
30  
31  
32  
33  
34  
35  
36  
37  
38  
39  
40  
41  
42  
43  
44  
45  
46  
47  
48  
49  
50  
51  
52  
53  
54  
55  
56  
57  
58  
59  
60

### Contributions:

- Dr. Geoffrey Maina was involved in the conceptualisation and writing of the protocol.
- Taryn Phaneuf was involved in the literature search, writing the introductory section, and proofreading the protocol.
- Maeve Mclean was involved in the literature search, writing the introductory section, and proofreading the protocol.
- Megan Kennedy was involved in designing the search strategy and writing the methods section.
- Dr. Ann Gakumo was involved in editing and proofreading the manuscript.
- Dr. Joseph Nguemo was involved in editing and proofreading the manuscript.
- Dr. Alexandra King was involved in editing and proofreading the manuscript.
- Solomon Kasha Mcharo was involved in the revision and formatting of the manuscript.

### Funding

This work was supported by the Faculty Recruitment and Retention Fund, University of Saskatchewan fund no. 419054.

**Conflicts of interests':** The authors have no conflicts of interest to declare.

Word count: 3255

## Appendix A

## Search Strategy – MEDLINE

The following search was run in Ovid MEDLINE on April 22, 2019:

|    |                                                                                                                                                                                                                        |  |
|----|------------------------------------------------------------------------------------------------------------------------------------------------------------------------------------------------------------------------|--|
| 1  | alaska natives/ or indians, central american/ or indians, north american/ or indians,<br>south american/ or inuits/                                                                                                    |  |
| 2  | Oceanic Ancestry Group/                                                                                                                                                                                                |  |
| 3  | (indigenous or Indigenous* or "first nation" or "first nations" or metis or native or<br>natives or "first people" or "first peoples" or "on reserve" or "off reserve" or inuit* or<br>eskimo* or maori*).ab,ti,kw,kf. |  |
| 4  | Health Services, Indigenous/                                                                                                                                                                                           |  |
| 5  | or/1-4                                                                                                                                                                                                                 |  |
| 6  | Child/                                                                                                                                                                                                                 |  |
| 7  | (children? or child? or young or youth? or juvenile? or kid or kids or underage* or<br>preteen* or preadolescen*).ab,ti,kw.                                                                                            |  |
| 8  | ((school or under) adj1 age*) or (pre adj1 (teen* or adolescen*))).ab,ti,kf                                                                                                                                            |  |
| 9  | ((elementary or primary or middle or grade or grammar or junior or secondary) adj1<br>school*).ab,ti,kf.                                                                                                               |  |
| 10 | "junior high".ab,ti,tw.                                                                                                                                                                                                |  |
| 11 | Schools/                                                                                                                                                                                                               |  |
| 12 | or/6-11                                                                                                                                                                                                                |  |
| 13 | 5 and 12                                                                                                                                                                                                               |  |
| 14 | exp Substance-Related Disorders/ed, pc, px [Education, Prevention & Control,<br>Psychology]                                                                                                                            |  |
| 15 | exp Alcohol-Related Disorders/pc, px [Prevention & Control, Psychology]                                                                                                                                                |  |
| 16 | exp Opioid-Related Disorders/pc, px [Prevention & Control, Psychology]                                                                                                                                                 |  |

|    |                                                                                                                                                                                                                               |  |
|----|-------------------------------------------------------------------------------------------------------------------------------------------------------------------------------------------------------------------------------|--|
| 17 | exp Prescription Drug Misuse/pc, px [Prevention & Control, Psychology]                                                                                                                                                        |  |
| 18 | or/ 14-17                                                                                                                                                                                                                     |  |
| 19 | Underage Drinking/                                                                                                                                                                                                            |  |
| 20 | Drug-Seeking Behavior/                                                                                                                                                                                                        |  |
| 21 | exp "Marijuana Use"/                                                                                                                                                                                                          |  |
| 22 | ((legal* or illegal* or prescription or illicit or street or club) adj1 (drug? or medication?)).ab,ti,kf.                                                                                                                     |  |
| 23 | ((binge or underage or "under age" or teen or adolescent?) adj1 (drink* or alcohol)).ab,ti,kf.                                                                                                                                |  |
| 24 | controlled substances/ or medical marijuana/ or prescription drugs/ or exp street drugs/ or exp synthetic drugs/                                                                                                              |  |
| 25 | exp "hypnotics and sedatives"/ or exp narcotics/ or exp analgesics, opioid/ or exp hallucinogens/ or performance-enhancing substances/                                                                                        |  |
| 26 | opium/ or (heroin or opium or smack or dope or horse or "china white").ab,ti,tw                                                                                                                                               |  |
| 27 | exp cannabinoids/ or cannabis/ or (marijuana or weed or pot or hash or hashish or ganja or blunt? or joint? or "mary jane" or reefer or CBD or cannbin* or cannabis).ab,ti,tw                                                 |  |
| 28 | Central Nervous System Stimulants/ or (cocaine or coke or "crack cocaine" or amphetamine? or methamphetamine? or meth or crank or speed or upper? or "club drug" or "club drugs" or MDMA or ecstasy or molly or GHB).ab,ti,tw |  |
| 29 | ketamine/ or phencyclidine/ or exp salvia/ or dextromethorphan/ or ("dissociative drugs" or "dissociative drug" or "special k" or PCP or "angel dust" or robotripping).ab,ti,tw.                                              |  |

|    |                                                                                                                                                                               |  |
|----|-------------------------------------------------------------------------------------------------------------------------------------------------------------------------------|--|
| 30 | mescaline/ or psilocybin/ or exp testosterone congeners/ or (hallucinogen* or LSD or acid or peyote or "magic mushrooms" or shrooms or "anabolic steroids" or roids).ab,ti,tw |  |
| 31 | nitrous oxide/ or (inhalant? or "laughing gas" or popper? or snapper? or whippets or huffing).ab,ti,tw                                                                        |  |
| 32 | Or/ 19-31                                                                                                                                                                     |  |
| 33 | (abus* or misus* or "inappropriate use").ab,ti,tw                                                                                                                             |  |
| 34 | (prevent* or intervention or intervene or program? or programme? or activit* or support* or initiative?).ab,ti,tw.                                                            |  |
| 35 | school health services/ or health education/ or health promotion/                                                                                                             |  |
| 36 | 34 or 35                                                                                                                                                                      |  |
| 37 | 32 and 33 and 36                                                                                                                                                              |  |
| 38 | 18 or 37                                                                                                                                                                      |  |
| 39 | 13 and 38                                                                                                                                                                     |  |
| 40 | limit 39 to (english language and yr="2009 -Current")                                                                                                                         |  |
