# Supplementary material for: School-based interventions for preventing substance use in indigenous children ages 7–13: a scoping review protocol
Source: PubMed Central journal article supplement — BMJ Open. 2020 Feb 12;10(2):e034032. doi: 10.1136/bmjopen-2019-034032 (PMC7045254; doi:10.1136/bmjopen-2019-034032), 2020-02-12
Supplement: bmjopen-2019-034032supp001.pdf [file bmjopen-2019-034032supp001.pdf]

## Appendix A

## Search Strategy – MEDLINE

The following search was run in Ovid MEDLINE on April 22, 2019:

|    |                                                                                                                                                                                                                  |  |
|----|------------------------------------------------------------------------------------------------------------------------------------------------------------------------------------------------------------------|--|
| 1  | alaska natives/ or indians, central american/ or indians, north american/ or indians, south american/ or inuits/                                                                                                 |  |
| 2  | Oceanic Ancestry Group/                                                                                                                                                                                          |  |
| 3  | (indigenous or Indigenous* or "first nation" or "first nations" or metis or native or natives or "first people" or "first peoples" or "on reserve" or "off reserve" or inuit* or eskimo* or maori*).ab,ti,kw,kf. |  |
| 4  | Health Services, Indigenous/                                                                                                                                                                                     |  |
| 5  | or/1-4                                                                                                                                                                                                           |  |
| 6  | Child/                                                                                                                                                                                                           |  |
| 7  | (children? or child? or young or youth? or juvenile? or kid or kids or underage* or preteen* or preadolescen*).ab,ti,kw.                                                                                         |  |
| 8  | ((school or under) adj1 age*) or (pre adj1 (teen* or adolescen*))).ab,ti,kf                                                                                                                                      |  |
| 9  | ((elementary or primary or middle or grade or grammar or junior or secondary) adj1 school*).ab,ti,kf.                                                                                                            |  |
| 10 | "junior high".ab,ti,tw.                                                                                                                                                                                          |  |
| 11 | Schools/                                                                                                                                                                                                         |  |
| 12 | or/6-11                                                                                                                                                                                                          |  |
| 13 | 5 and 12                                                                                                                                                                                                         |  |
| 14 | exp Substance-Related Disorders/ed, pc, px [Education, Prevention & Control, Psychology]                                                                                                                         |  |
| 15 | exp Alcohol-Related Disorders/pc, px [Prevention & Control, Psychology]                                                                                                                                          |  |
| 16 | exp Opioid-Related Disorders/pc, px [Prevention & Control, Psychology]                                                                                                                                           |  |

|    |                                                                                                                                                                                                                               |  |
|----|-------------------------------------------------------------------------------------------------------------------------------------------------------------------------------------------------------------------------------|--|
| 17 | exp Prescription Drug Misuse/pc, px [Prevention & Control, Psychology]                                                                                                                                                        |  |
| 18 | or/ 14-17                                                                                                                                                                                                                     |  |
| 19 | Underage Drinking/                                                                                                                                                                                                            |  |
| 20 | Drug-Seeking Behavior/                                                                                                                                                                                                        |  |
| 21 | exp "Marijuana Use"/                                                                                                                                                                                                          |  |
| 22 | ((legal* or illegal* or prescription or illicit or street or club) adj1 (drug? or medication?)).ab,ti,kf.                                                                                                                     |  |
| 23 | ((binge or underage or "under age" or teen or adolescent?) adj1 (drink* or alcohol)).ab,ti,kf.                                                                                                                                |  |
| 24 | controlled substances/ or medical marijuana/ or prescription drugs/ or exp street drugs/ or exp synthetic drugs/                                                                                                              |  |
| 25 | exp "hypnotics and sedatives"/ or exp narcotics/ or exp analgesics, opioid/ or exp hallucinogens/ or performance-enhancing substances/                                                                                        |  |
| 26 | opium/ or (heroin or opium or smack or dope or horse or "china white").ab,ti,tw                                                                                                                                               |  |
| 27 | exp cannabinoids/ or cannabis/ or (marijuana or weed or pot or hash or hashish or ganja or blunt? or joint? or "mary jane" or reefer or CBD or cannbin* or cannabis).ab,ti,tw                                                 |  |
| 28 | Central Nervous System Stimulants/ or (cocaine or coke or "crack cocaine" or amphetamine? or methamphetamine? or meth or crank or speed or upper? or "club drug" or "club drugs" or MDMA or ecstasy or molly or GHB).ab,ti,tw |  |
| 29 | ketamine/ or phencyclidine/ or exp salvia/ or dextromethorphan/ or ("dissociative drugs" or "dissociative drug" or "special k" or PCP or "angel dust" or robotripping).ab,ti,tw.                                              |  |

|    |                                                                                                                                                                               |  |
|----|-------------------------------------------------------------------------------------------------------------------------------------------------------------------------------|--|
| 30 | mescaline/ or psilocybin/ or exp testosterone congeners/ or (hallucinogen* or LSD or acid or peyote or "magic mushrooms" or shrooms or "anabolic steroids" or roids).ab,ti,tw |  |
| 31 | nitrous oxide/ or (inhalant? or "laughing gas" or popper? or snapper? or whippets or huffing).ab,ti,tw                                                                        |  |
| 32 | Or/ 19-31                                                                                                                                                                     |  |
| 33 | (abus* or misus* or "inappropriate use").ab,ti,tw                                                                                                                             |  |
| 34 | (prevent* or intervention or intervene or program? or programme? or activit* or support* or initiative?).ab,ti,tw.                                                            |  |
| 35 | school health services/ or health education/ or health promotion/                                                                                                             |  |
| 36 | 34 or 35                                                                                                                                                                      |  |
| 37 | 32 and 33 and 36                                                                                                                                                              |  |
| 38 | 18 or 37                                                                                                                                                                      |  |
| 39 | 13 and 38                                                                                                                                                                     |  |
| 40 | limit 39 to (english language and yr="2009 -Current")                                                                                                                         |  |
